# Supplementary material for: Grassland productivity in response to nutrient additions and herbivory is scale-dependent
Source: PeerJ. 2016 Dec 1;4:e2745. doi: 10.7717/peerj.2745 (PMC5136131; doi:10.7717/peerj.2745)
Supplement: Data S1 — Data includes plot identification (MA, MB, MC, MD, ME, MF), subplot number (1–127), x and y coordinates (meters), subplot size (1 × 1 m, 2 × 2 m, 4 × 4 m), UTM coordinates for x and y plot coordinate, Disc Pasture Meter (DPM reading), grass biomass (grams/m2), soil phosphorus (P) concentration (mg/g), soil nitrogen (N) concentration (%), soil pH, soil carbon (C) content (%), vegetation N concentration (%), vegetation P concentration (mg/g), and vegetation C content (%). [file peerj-04-2745-s001.xlsx]

## Sheet: Metadata
Metadata_Mkambathi fertilization study
Erica Smithwick, Kusum Naithani, Doug Baldwin
Data collected 2011
Empirical Data	Units
DataType		Empirical = collected in field
Plot		MA = fenced, heterogeneous fertized, MB= fenced, unfertilized, MC = fenced, homogenous fertilized, MD = unfenced, homogenous, ME = unfenced, heterogeneous, MF = unfenced, unfertilized
Sub-plot		Subplots were numbered in the field (1-127) as a unique identifier
Sample_ID		subplots were subsampled; 2 locations within 1x1 plots (center and 0.5 m from center (random)); 4 samples within 2 x2 m (a-d); 8 samples within 4x4 plot (a-h))
X		plot coordinate from a 60 x 60 m plot boundary
Y		plot coordinate from a 60 x 60 m plot boundary
Plot_Size		1 = 1x1 m; 2 = 2 x 2 m; 4 = 4 x 4m
UTM_x		UTM coordinate along the x axis
UTM_y		UTM coordinate along the y axis
DPM		Disc pasture meter reading
Biomass	g m-2	Biomass (predicted from the regression of DPM to biomass, calculated on independent subset of plots)
Soil_P	mg kg-1	Soil P concentration
Soil_N	%	Soil N concentration
Soil_pH		Soil pH
Soil_C	%	Soil C content
Veg_C	%	Foliar C concentration
Veg_N	%	Foliar N concentration
Veg_P	%	Foliar P concentration
Simulated Data
DataType		Simulated = neutral model, baed on empirical data
Plot		MA = fenced, heterogeneous fertized, MB= fenced, unfertilized, MC = fenced, homogenous fertilized, MD = unfenced, homogenous, ME = unfenced, heterogeneous, MF = unfenced, unfertilized
Plot_x		plot coordinate from a 60 x 60 m plot boundary
Plot_y		plot coordinate from a 60 x 60 m plot boundary
UTM_x		UTM coordinate along the x axis
UTM_y		UTM coordinate along the y axis
Biomass		Simulated biomass

## Sheet: Field data
DataType	Plot	Sub-plot	Sample_ID	X	Y	Plot_Size	UTM_x	UTM_y	DPM	Biomass	Soil_P	Soil_N	Soil_pH	Soil_C	Veg_C	Veg_N	Veg_P
Empirical	MA	8	a	28.3	2.75	1	210486	6.54153e+06	31	594.6	83.08	0.15	3.8	2.34	NA	0.57	0.04
Empirical	MA	8	b	28.3	2.75	1	210485	6.54153e+06	27.5	542.45	92.72	0.16	3.9	2.27	NA	0.76	0.14
Empirical	MA	9	a	27	1.5	2	210483	6.54153e+06	33	624.4	NA	NA	NA	NA	NA	0.94	0.06
Empirical	MA	9	b	27	1.5	2	210483	6.54153e+06	29	564.8	52.02	0.17	3.8	2.52	NA	0.83	0.05
Empirical	MA	9	c	27	1.5	2	210483	6.54153e+06	38	698.9	161.95	0.18	3.8	2.57	NA	0.74	0.05
Empirical	MA	9	center	27	1.5	2	210483	6.54153e+06	NA	NA	NA	NA	NA	NA	NA	NA	NA
Empirical	MA	9	d	27	1.5	2	210484	6.54153e+06	19.5	423.25	NA	NA	NA	NA	NA	0.61	0.04
Empirical	MA	12	a	57.1	1.9	2	210513	6.54152e+06	16.5	378.55	45	0.22	4.2	2.54	NA	0.7	0.05
Empirical	MA	12	b	57.1	1.9	2	210514	6.54152e+06	14	341.3	225.16	0.19	4.2	2.41	NA	1.14	0.08
Empirical	MA	12	c	57.1	1.9	2	210514	6.54152e+06	29	564.8	336.44	0.18	3.9	2.62	NA	0.91	0.08
Empirical	MA	12	center	57.1	1.9	2	210514	6.54152e+06	NA	NA	NA	NA	NA	NA	NA	NA	NA
Empirical	MA	12	d	57.1	1.9	2	210514	6.54152e+06	28.5	557.35	183.3	0.2	4.2	2.58	NA	0.68	0.06
Empirical	MA	13	a	13.5	1.4	1	210472	6.54153e+06	13	326.4	NA	NA	NA	NA	NA	0.83	0.08
Empirical	MA	13	b	13.5	1.4	1	210472	6.54153e+06	13.5	333.85	NA	NA	NA	NA	NA	0.95	0.06
Empirical	MA	14	a	11.3	8.5	1	210470	6.54153e+06	NA	NA	NA	NA	NA	NA	44.55	0.7	0.04
Empirical	MA	14	b	11.3	8.5	1	210470	6.54153e+06	NA	NA	68.17	0.18	3.9	2.46	43.64	0.45	0.02
Empirical	MA	15	a	21.4	6.7	1	210479	6.54153e+06	31.5	602.05	130.89	0.17	3.9	2.33	NA	0.91	0.07
Empirical	MA	15	b	21.4	6.7	1	210480	6.54153e+06	30	579.7	85.28	0.23	4.4	2.18	NA	0.78	0.04
Empirical	MA	17	a	38.8	8.3	1	210498	6.54152e+06	25.5	512.65	NA	NA	NA	NA	NA	0.76	0.05
Empirical	MA	17	b	38.8	8.3	1	210498	6.54152e+06	36.5	676.55	102.38	0.18	3.9	2.44	NA	0.65	0.03
Empirical	MA	20	a	8.28	7	1	210467	6.54153e+06	14.5	348.75	97.45	0.18	3.9	2.49	NA	0.69	0.04
Empirical	MA	20	b	8.28	7	1	210467	6.54153e+06	18	400.9	71.33	0.19	3.9	2.43	NA	0.94	0.05
Empirical	MA	21	a	6.33	11.8	1	210467	6.54154e+06	30	579.7	NA	NA	NA	NA	NA	1	0.04
Empirical	MA	21	b	6.33	11.8	1	210467	6.54154e+06	26.5	527.55	NA	NA	NA	NA	NA	0.55	0.04
Empirical	MA	22	a	12.4	12.6	2	210473	6.54154e+06	NA	NA	114.99	0.16	3.9	2.44	NA	0.69	0.08
Empirical	MA	22	b	12.4	12.6	2	210473	6.54154e+06	NA	NA	76.92	0.24	4.3	2.48	NA	0.53	0.04
Empirical	MA	22	c	12.4	12.6	2	210474	6.54154e+06	NA	NA	596.05	0.23	4.2	2.68	NA	0.57	0.08
Empirical	MA	22	center	12.4	12.6	2	210473	6.54154e+06	NA	NA	NA	NA	NA	NA	NA	NA	NA
Empirical	MA	22	d	12.4	12.6	2	210474	6.54154e+06	NA	NA	113.59	0.24	4.3	2.65	NA	0.6	0.06
Empirical	MA	26	a	32.4	12.2	1	210495	6.54153e+06	20.4	436.66	223.07	0.18	3.9	2.55	NA	0.82	0.05
Empirical	MA	26	b	32.4	12.2	1	210495	6.54153e+06	29	564.8	NA	NA	NA	NA	NA	0.81	0.05
Empirical	MA	27	a	42.4	13.09	1	210505	6.54153e+06	41	743.6	110.56	0.17	3.8	2.54	NA	0.53	0.04
Empirical	MA	27	b	42.4	13.09	1	210505	6.54153e+06	41	743.6	NA	NA	NA	NA	NA	0.62	0.06
Empirical	MA	29	a	52.5	12.1	4	210511	6.54153e+06	17	386	88.85	0.2	4.1	2.58	NA	0.97	0.06
Empirical	MA	29	b	52.5	12.1	4	210511	6.54153e+06	14	341.3	79.7	0.2	3.9	2.6	NA	0.8	0.04
Empirical	MA	29	c	52.5	12.1	4	210511	6.54152e+06	24.5	497.75	264.86	0.2	3.8	2.64	NA	0.91	0.1
Empirical	MA	29	center	52.5	12.1	4	210511	6.54153e+06	NA	NA	NA	NA	NA	NA	NA	NA	NA
Empirical	MA	29	d	52.5	12.1	4	210511	6.54153e+06	21	445.6	473.16	0.22	4.4	2.21	NA	0.74	0.06
Empirical	MA	29	e	52.5	12.1	4	210512	6.54153e+06	40	728.7	532.56	0.23	3.9	2.68	NA	0.63	0.06
Empirical	MA	29	f	52.5	12.1	4	210512	6.54153e+06	26	520.1	85.91	0.2	4	2.7	NA	0.67	0.05
Empirical	MA	29	g	52.5	12.1	4	210512	6.54153e+06	13	326.4	335.61	0.23	3.9	2.65	NA	0.64	0.06
Empirical	MA	29	h	52.5	12.1	4	210512	6.54153e+06	15.5	363.65	45.7	0.13	3.8	1.98	NA	0.87	0.04
Empirical	MA	32	a	3	18.23	4	210463	6.54154e+06	37	684	61.37	0.16	3.9	2.44	NA	0.68	0.08
Empirical	MA	32	b	3	18.23	4	210463	6.54154e+06	17	386	74.92	0.2	3.8	2.31	NA	0.72	0.04
Empirical	MA	32	c	3	18.23	4	210463	6.54154e+06	18	400.9	62.08	0.18	3.8	2.6	NA	0.68	0.05
Empirical	MA	32	center	3	18.23	4	210464	6.54154e+06	NA	NA	NA	NA	NA	NA	NA	NA	NA
Empirical	MA	32	d	3	18.23	4	210464	6.54154e+06	39	713.8	349.15	0.26	4.2	2.52	NA	0.77	0.11
Empirical	MA	32	e	3	18.23	4	210464	6.54154e+06	12	311.5	309.47	0.19	3.9	2.47	NA	0.64	0.07
Empirical	MA	32	f	3	18.23	4	210464	6.54154e+06	10	281.7	72.81	0.19	4.3	2.42	NA	0.85	0.05
Empirical	MA	32	g	3	18.23	4	210464	6.54154e+06	15	356.2	88.37	0.17	4	2.06	NA	0.54	0.03
Empirical	MA	32	h	3	18.23	4	210465	6.54154e+06	10	281.7	82.81	0.17	4	2.46	NA	0.56	0.04
Empirical	MA	34	a	7.4	16.65	1	210468	6.54154e+06	31	594.6	117.71	0.2	4	2.5	NA	0.8	0.06
Empirical	MA	34	b	7.4	16.65	1	210468	6.54154e+06	34.5	646.75	387.12	0.17	3.9	2.54	NA	0.75	0.05
Empirical	MA	45	a	7.43	23.5	1	210471	6.54155e+06	25	505.2	NA	NA	NA	NA	NA	0.75	0.05
Empirical	MA	45	b	7.43	23.5	1	210472	6.54155e+06	22.5	467.95	NA	NA	NA	NA	NA	0.64	0.07
Empirical	MA	46	a	12.7	22.5	4	210475	6.54155e+06	23.5	482.85	64.68	0.17	4	2.6	NA	0.54	0.04
Empirical	MA	46	b	12.7	22.5	4	210475	6.54155e+06	23.5	482.85	446.71	0.16	3.8	2.57	NA	0.55	0.09
Empirical	MA	46	c	12.7	22.5	4	210475	6.54155e+06	19	415.8	53.62	0.15	3.9	2.55	NA	0.81	0.05
Empirical	MA	46	center	12.7	22.5	4	210475	6.54155e+06	NA	NA	NA	NA	NA	NA	NA	NA	NA
Empirical	MA	46	d	12.7	22.5	4	210475	6.54155e+06	17	386	NA	NA	NA	NA	NA	0.9	0.06
Empirical	MA	46	e	12.7	22.5	4	210476	6.54155e+06	14	341.3	NA	NA	NA	NA	NA	0.88	0.05
Empirical	MA	46	f	12.7	22.5	4	210476	6.54155e+06	24	490.3	41.78	0.17	3.9	2.48	NA	0.78	0.04
Empirical	MA	46	g	12.7	22.5	4	210476	6.54155e+06	17.5	393.45	66.59	0.27	4.2	2.36	NA	1.15	0.06
Empirical	MA	46	h	12.7	22.5	4	210476	6.54155e+06	27	535	89.88	0.2	4.4	2.49	NA	0.61	0.04
Empirical	MA	55	a	7.4	26.41	1	210468	6.54155e+06	22	460.5	286.09	0.18	3.9	2.44	NA	0.9	0.06
Empirical	MA	55	b	7.4	26.41	1	210469	6.54155e+06	26	520.1	NA	NA	NA	NA	NA	0.75	0.05
Empirical	MA	56	a	17.3	26.6	2	210480	6.54155e+06	60	1026.7	86.57	0.17	3.9	2.5	NA	0.74	0.06
Empirical	MA	56	b	17.3	26.6	2	210480	6.54155e+06	65	1101.2	117.9	0.23	4.2	2.32	NA	1.04	0.11
Empirical	MA	56	c	17.3	26.6	2	210480	6.54155e+06	60	1026.7	95.24	0.19	4.2	2.22	NA	0.96	0.08
Empirical	MA	56	center	17.3	26.6	2	210480	6.54155e+06	NA	NA	NA	NA	NA	NA	NA	NA	NA
Empirical	MA	56	d	17.3	26.6	2	210480	6.54155e+06	65	1101.2	98.05	0.2	4.2	2.49	NA	0.65	0.05
Empirical	MA	62	a	56.6	28	1	210517	6.54154e+06	32.5	616.95	318.39	0.18	3.8	2.58	45.59	0.62	0.04
Empirical	MA	62	b	56.6	28	1	210517	6.54154e+06	31.5	602.05	275.58	0.17	4	2.61	46.38	0.83	0.04
Empirical	MA	66	a	26	31.2	1	210489	6.54155e+06	NA	NA	NA	NA	NA	NA	NA	NA	NA
Empirical	MA	66	b	26	31.2	1	210489	6.54155e+06	NA	NA	NA	NA	NA	NA	NA	0.52	0.02
Empirical	MA	68	a	37.2	31.63	1	210502	6.54155e+06	36	669.1	205.63	0.17	3.9	2.41	NA	0.7	0.07
Empirical	MA	68	b	37.2	31.63	1	210501	6.54155e+06	39	713.8	247.19	0.19	4.3	2.65	NA	0.85	0.09
Empirical	MA	69	a	38.2	32.84	1	210504	6.54155e+06	31	594.6	241.95	0.17	3.9	2.54	NA	0.84	0.06
Empirical	MA	69	b	38.2	32.84	1	210503	6.54155e+06	26.5	527.55	99.55	0.22	4.2	2.52	NA	0.94	0.05
Empirical	MA	70	a	43.4	30.91	1	210506	6.54155e+06	30.5	587.15	NA	NA	NA	NA	NA	NA	NA
Empirical	MA	70	b	43.4	30.91	1	210506	6.54155e+06	23.5	482.85	NA	NA	NA	NA	NA	NA	NA
Empirical	MA	78	a	42.75	37.16	2	210507	6.54156e+06	15	356.2	153.29	0.17	4.1	2.61	44.19	0.57	0.05
Empirical	MA	78	b	42.75	37.16	2	210508	6.54156e+06	24.5	497.75	108.58	0.16	3.9	2.46	44.99	0.59	0.04
Empirical	MA	78	c	42.75	37.16	2	210508	6.54156e+06	26	520.1	NA	NA	NA	NA	44.37	0.53	0.04
Empirical	MA	78	center	42.75	37.16	2	210508	6.54156e+06	NA	NA	NA	NA	NA	NA	NA	NA	NA
Empirical	MA	78	d	42.75	37.16	2	210508	6.54156e+06	30.5	587.15	105.17	0.19	4.2	2.48	44.1	0.52	0.05
Empirical	MA	81	a	46.13	35.3	1	210510	6.54155e+06	27.5	542.45	NA	NA	NA	NA	NA	NA	NA
Empirical	MA	81	b	46.13	35.3	1	210510	6.54155e+06	30	579.7	NA	NA	NA	NA	NA	NA	NA
Empirical	MA	82	a	53	38.4	1	210517	6.54155e+06	30	579.7	388.23	0.16	3.9	2.33	45.99	0.97	0.06
Empirical	MA	82	b	53	38.4	1	210517	6.54155e+06	25.5	512.65	163.64	0.19	4.2	2.59	42.98	0.69	0.06
Empirical	MA	84	a	59.8	35.8	1	210520	6.54155e+06	30.5	587.15	202.18	0.2	3.9	2.47	NA	0.57	0.06
Empirical	MA	84	b	59.8	35.8	1	210519	6.54155e+06	33	624.4	264.29	0.16	3.8	2.69	NA	0.76	0.07
Empirical	MA	85	a	2.3	42.8	1	210467	6.54158e+06	37.5	691.45	NA	NA	NA	NA	NA	0.42	0.04
Empirical	MA	85	b	2.3	42.8	1	210467	6.54158e+06	29	564.8	94.69	0.17	3.9	2.56	NA	0.71	0.06
Empirical	MA	86	a	3.1	44	1	210467	6.54157e+06	12	311.5	122.59	0.17	3.9	2.44	NA	0.62	0.04
Empirical	MA	86	b	3.1	44	1	210467	6.54157e+06	34.5	646.75	93.62	0.19	3.9	2.46	NA	0.6	0.04
Empirical	MA	87	a	13.4	41.9	1	210479	6.54157e+06	36	669.1	109.39	0.17	3.9	2.32	NA	0.87	0.05
Empirical	MA	87	b	13.4	41.9	1	210480	6.54157e+06	33.5	631.85	35.15	0.16	3.9	2.38	NA	0.59	0.03
Empirical	MA	94	a	58.3	42.2	1	210520	6.54155e+06	32	609.5	NA	NA	NA	NA	NA	NA	NA
Empirical	MA	94	b	58.3	42.2	1	210520	6.54155e+06	25	505.2	NA	NA	NA	NA	NA	NA	NA
Empirical	MA	95	a	1.3	47.6	1	210463	6.54157e+06	39	713.8	108.54	0.2	4	2.56	NA	0.54	0.03
Empirical	MA	95	b	1.3	47.6	1	210463	6.54158e+06	47	833	127.95	0.19	4.4	2.55	NA	0.62	0.04
Empirical	MA	104	a	55.7	48.4	1	210518	6.54156e+06	33.5	631.85	NA	NA	NA	NA	NA	NA	NA
Empirical	MA	104	b	55.7	48.4	1	210517	6.54156e+06	27	535	NA	NA	NA	NA	NA	NA	NA
Empirical	MA	105	a	4.5	52.3	1	210472	6.54158e+06	19.5	423.25	143.29	0.19	4	2.48	NA	0.7	0.07
Empirical	MA	105	b	4.5	52.3	1	210472	6.54158e+06	29	564.8	NA	NA	NA	NA	NA	0.57	0.04
Empirical	MA	106	a	16.6	56.7	1	210480	6.54157e+06	51	892.6	233.82	0.18	4	2.65	NA	0.53	0.05
Empirical	MA	106	b	16.6	56.7	1	210480	6.54157e+06	40	728.7	63.36	0.22	4.3	2.56	NA	0.72	0.05
Empirical	MA	108	a	29.1	51.7	2	210493	6.54157e+06	21	445.6	333.15	0.18	3.9	2.4	NA	0.59	0.05
Empirical	MA	108	b	29.1	51.7	2	210494	6.54157e+06	17.5	393.45	118.25	0.17	3.9	2.3	NA	0.53	0.04
Empirical	MA	108	c	29.1	51.7	2	210494	6.54157e+06	20.5	438.15	125.88	0.18	4.3	2.61	NA	0.56	0.04
Empirical	MA	108	center	29.1	51.7	2	210494	6.54157e+06	NA	NA	NA	NA	NA	NA	NA	NA	NA
Empirical	MA	108	d	29.1	51.7	2	210494	6.54157e+06	18.5	408.35	146.92	0.18	3.9	2.52	NA	0.68	0.05
Empirical	MA	109	a	26.8	53.3	1	210489	6.54157e+06	40	728.7	107.31	0.17	4.3	2.65	NA	0.51	0.03
Empirical	MA	109	b	26.8	53.3	1	210489	6.54157e+06	33	624.4	168.12	0.19	3.9	2.6	NA	0.45	0.07
Empirical	MA	110	a	29.2	53.8	1	210496	6.54157e+06	20	430.7	NA	NA	NA	NA	NA	0.91	0.06
Empirical	MA	110	b	29.2	53.8	1	210496	6.54157e+06	34.5	646.75	135.52	0.21	4	2.57	NA	0.72	0.05
Empirical	MA	113	a	49.1	53.2	2	210513	6.54157e+06	21	445.6	96.62	0.19	3.9	2.44	NA	0.67	0.05
Empirical	MA	113	b	49.1	53.2	2	210514	6.54157e+06	18.5	408.35	NA	NA	NA	NA	NA	0.64	0.03
Empirical	MA	113	c	49.1	53.2	2	210514	6.54157e+06	16	371.1	NA	NA	NA	NA	NA	0.54	0.04
Empirical	MA	113	center	49.1	53.2	2	210514	6.54157e+06	NA	NA	NA	NA	NA	NA	NA	NA	NA
Empirical	MA	113	d	49.1	53.2	2	210514	6.54157e+06	12	311.5	73.44	0.19	4.2	2.42	NA	0.73	0.04
Empirical	MA	116	a	2.1	56.5	1	210469	6.54159e+06	13	326.4	149.75	0.16	3.8	2.5	NA	0.59	0.08
Empirical	MA	116	b	2.1	56.5	1	210469	6.54159e+06	39	713.8	116.25	0.19	3.9	2.66	NA	0.81	0.07
Empirical	MA	121	a	28.2	56.6	1	210494	6.54158e+06	21.5	453.05	144.38	0.15	3.9	2.42	NA	0.85	0.06
Empirical	MA	121	b	28.2	56.6	1	210494	6.54158e+06	32	609.5	53.23	0.19	3.8	2.43	NA	0.76	0.05
Empirical	MA	123	a	36.9	58	4	210502	6.54158e+06	30	579.7	NA	NA	NA	NA	NA	0.59	0.04
Empirical	MA	123	b	36.9	58	4	210502	6.54158e+06	37	684	NA	NA	NA	NA	NA	0.65	0.12
Empirical	MA	123	c	36.9	58	4	210502	6.54158e+06	30.5	587.15	412.47	0.2	3.9	2.43	NA	0.32	0.03
Empirical	MA	123	center	36.9	58	4	210503	6.54158e+06	NA	NA	NA	NA	NA	NA	NA	NA	NA
Empirical	MA	123	d	36.9	58	4	210502	6.54158e+06	38	698.9	230.86	0.24	4.4	2.61	NA	0.68	0.06
Empirical	MA	123	e	36.9	58	4	210503	6.54158e+06	45	803.2	146.72	0.16	3.9	2.27	NA	0.71	0.05
Empirical	MA	123	f	36.9	58	4	210503	6.54158e+06	16	371.1	32.66	0.18	3.9	2.63	NA	0.79	0.06
Empirical	MA	123	g	36.9	58	4	210503	6.54158e+06	19	415.8	NA	NA	NA	NA	NA	0.71	0.05
Empirical	MA	123	h	36.9	58	4	210503	6.54158e+06	38	698.9	NA	NA	NA	NA	NA	0.7	0.05
Empirical	MA	127	a	58.2	12.25	2	210518	6.54152e+06	27	535	NA	NA	NA	NA	NA	0.53	0.04
Empirical	MA	127	b	58.2	12.25	2	210518	6.54152e+06	17	386	91.77	0.19	4.1	2.67	NA	0.71	0.04
Empirical	MA	127	c	58.2	12.25	2	210518	6.54153e+06	17	386	NA	NA	NA	NA	NA	0.68	0.03
Empirical	MA	127	center	58.2	12.25	2	210518	6.54153e+06	NA	NA	NA	NA	NA	NA	NA	NA	NA
Empirical	MA	127	d	58.2	12.25	2	210518	6.54153e+06	17	386	40.28	0.19	4.2	2.49	NA	0.73	0.05
Empirical	MB	1	a	1	4	1	210386	6.54155e+06	12	311.5	NA	NA	NA	NA	44.33	0.5	0.03
Empirical	MB	1	b	1	4	1	210386	6.54155e+06	9	266.8	NA	NA	NA	NA	44.05	0.53	0.03
Empirical	MB	3	a	1.7	11.4	1	210394	6.54155e+06	11	296.6	111.13	0.17	4.3	2.58	NA	NA	NA
Empirical	MB	3	b	1.7	11.4	1	210394	6.54155e+06	23.5	482.85	NA	NA	NA	NA	NA	NA	NA
Empirical	MB	6	a	13.05	27.29	1	210414	6.54155e+06	15	356.2	NA	NA	NA	NA	NA	NA	NA
Empirical	MB	6	b	13.05	27.29	1	210414	6.54155e+06	17	386	NA	NA	NA	NA	NA	NA	NA
Empirical	MB	12	a	3.82	58.45	2	210442	6.54154e+06	15.5	363.65	NA	NA	NA	NA	NA	NA	NA
Empirical	MB	12	b	3.82	58.45	2	210442	6.54154e+06	12	311.5	NA	NA	NA	NA	NA	NA	NA
Empirical	MB	12	c	3.82	58.45	2	210442	6.54154e+06	13.5	333.85	NA	NA	NA	NA	NA	NA	NA
Empirical	MB	12	center	3.82	58.45	2	210442	6.54154e+06	NA	NA	NA	NA	NA	NA	NA	NA	NA
Empirical	MB	12	d	3.82	58.45	2	210442	6.54154e+06	16	371.1	NA	NA	NA	NA	NA	NA	NA
Empirical	MB	13	a	8.65	13.2	1	210398	6.54155e+06	19	415.8	NA	NA	NA	NA	NA	NA	NA
Empirical	MB	13	b	8.65	13.2	1	210398	6.54155e+06	20	430.7	72.96	0.15	4.3	2.51	NA	NA	NA
Empirical	MB	15	a	8.3	21.72	1	210404	6.54155e+06	10	281.7	NA	NA	NA	NA	NA	NA	NA
Empirical	MB	15	b	8.3	21.72	1	210404	6.54155e+06	15	356.2	NA	NA	NA	NA	NA	NA	NA
Empirical	MB	16	a	31.6	8.05	1	210395	6.54158e+06	10	281.7	NA	NA	NA	NA	NA	NA	NA
Empirical	MB	16	b	31.6	8.05	1	210395	6.54158e+06	18	400.9	NA	NA	NA	NA	NA	0.47	0.03
Empirical	MB	18	a	46.4	7.2	1	210399	6.54159e+06	17	386	53.71	0.14	4.3	2.52	NA	NA	NA
Empirical	MB	18	b	46.4	7.2	1	210399	6.54159e+06	17.5	393.45	44.22	0.13	4.3	2.59	NA	NA	NA
Empirical	MB	21	a	5.7	10.35	1	210393	6.54155e+06	18	400.9	68.67	0.19	4.4	2.44	NA	0.58	0.03
Empirical	MB	21	b	5.7	10.35	1	210393	6.54155e+06	16	371.1	85.59	0.19	4.3	2.66	NA	0.89	0.04
Empirical	MB	29	a	47.3	11.7	4	210404	6.54159e+06	22	460.5	NA	NA	NA	NA	NA	0.54	0.03
Empirical	MB	29	a	47.3	11.7	4	210404	6.54159e+06	22	460.5	NA	NA	NA	NA	NA	0.54	0.03
Empirical	MB	29	b	47.3	11.7	4	210404	6.54159e+06	29	564.8	NA	NA	NA	NA	NA	0.65	0.03
Empirical	MB	29	b	47.3	11.7	4	210404	6.54159e+06	29	564.8	NA	NA	NA	NA	NA	0.65	0.03
Empirical	MB	29	c	47.3	11.7	4	210404	6.54159e+06	15	356.2	NA	NA	NA	NA	NA	0.48	0.03
Empirical	MB	29	c	47.3	11.7	4	210404	6.54159e+06	15	356.2	NA	NA	NA	NA	NA	0.48	0.03
Empirical	MB	29	d	47.3	11.7	4	210405	6.54159e+06	17	386	NA	NA	NA	NA	NA	0.62	0.03
Empirical	MB	29	d	47.3	11.7	4	210405	6.54159e+06	17	386	NA	NA	NA	NA	NA	0.62	0.03
Empirical	MB	29	e	47.3	11.7	4	210405	6.54159e+06	11	296.6	NA	NA	NA	NA	NA	0.56	0.04
Empirical	MB	29	e	47.3	11.7	4	210405	6.54159e+06	11	296.6	NA	NA	NA	NA	NA	0.56	0.04
Empirical	MB	29	f	47.3	11.7	4	210405	6.54159e+06	25	505.2	NA	NA	NA	NA	NA	0.35	0.02
Empirical	MB	29	f	47.3	11.7	4	210405	6.54159e+06	25	505.2	NA	NA	NA	NA	NA	0.35	0.02
Empirical	MB	29	g	47.3	11.7	4	210405	6.54159e+06	13	326.4	NA	NA	NA	NA	NA	0.59	0.03
Empirical	MB	29	g	47.3	11.7	4	210405	6.54159e+06	13	326.4	NA	NA	NA	NA	NA	0.59	0.03
Empirical	MB	29	h	47.3	11.7	4	210406	6.54159e+06	19	415.8	NA	NA	NA	NA	NA	0.43	0.03
Empirical	MB	29	h	47.3	11.7	4	210406	6.54159e+06	19	415.8	NA	NA	NA	NA	NA	0.43	0.03
Empirical	MB	32	a	2	17.9	4	210399	6.54155e+06	20	430.7	NA	NA	NA	NA	NA	NA	NA
Empirical	MB	32	b	2	17.9	4	210399	6.54155e+06	13.5	333.85	NA	NA	NA	NA	NA	NA	NA
Empirical	MB	32	c	2	17.9	4	210399	6.54155e+06	39	713.8	NA	NA	NA	NA	NA	NA	NA
Empirical	MB	32	d	2	17.9	4	210399	6.54155e+06	17	386	NA	NA	NA	NA	NA	0.57	0.04
Empirical	MB	32	e	2	17.9	4	210399	6.54155e+06	13	326.4	NA	NA	NA	NA	NA	NA	NA
Empirical	MB	32	f	2	17.9	4	210400	6.54155e+06	10	281.7	NA	NA	NA	NA	NA	NA	NA
Empirical	MB	32	g	2	17.9	4	210400	6.54155e+06	8.5	259.35	NA	NA	NA	NA	NA	NA	NA
Empirical	MB	32	h	2	17.9	4	210400	6.54155e+06	16.5	378.55	NA	NA	NA	NA	NA	NA	NA
Empirical	MB	34	a	8.6	18.85	1	210402	6.54155e+06	17.5	393.45	59.67	0.17	4.3	2.57	NA	NA	NA
Empirical	MB	34	b	8.6	18.85	1	210401	6.54155e+06	18	400.9	NA	NA	NA	NA	NA	NA	NA
Empirical	MB	37	a	22.25	17.47	2	210404	6.54157e+06	17.5	393.45	NA	NA	NA	NA	NA	NA	NA
Empirical	MB	37	b	22.25	17.47	2	210404	6.54157e+06	14	341.3	NA	NA	NA	NA	NA	NA	NA
Empirical	MB	37	c	22.25	17.47	2	210404	6.54157e+06	13	326.4	NA	NA	NA	NA	NA	NA	NA
Empirical	MB	37	d	22.25	17.47	2	210404	6.54157e+06	14.5	348.75	NA	NA	NA	NA	NA	NA	NA
Empirical	MB	38	a	25.55	16.1	2	210403	6.54157e+06	22	460.5	NA	NA	NA	NA	NA	NA	NA
Empirical	MB	38	b	25.55	16.1	2	210403	6.54157e+06	22	460.5	NA	NA	NA	NA	NA	NA	NA
Empirical	MB	38	c	25.55	16.1	2	210404	6.54157e+06	8	251.9	59.35	0.15	4.2	2.55	NA	NA	NA
Empirical	MB	38	d	25.55	16.1	2	210404	6.54157e+06	10	281.7	NA	NA	NA	NA	NA	NA	NA
Empirical	MB	42	a	53.9	16.62	1	210410	6.5416e+06	17.5	393.45	80.22	0.12	4.3	2.35	NA	0.42	0.03
Empirical	MB	42	b	53.9	16.62	1	210410	6.5416e+06	24	490.3	72.07	0.13	4.3	2.07	NA	0.52	0.03
Empirical	MB	49	a	15.86	24.2	1	210407	6.54156e+06	21.5	453.05	NA	NA	NA	NA	NA	NA	NA
Empirical	MB	49	b	15.86	24.2	1	210407	6.54156e+06	19.5	423.25	NA	NA	NA	NA	NA	NA	NA
Empirical	MB	52	a	37.85	23.25	2	210413	6.54158e+06	19	415.8	NA	NA	NA	NA	NA	NA	NA
Empirical	MB	52	b	37.85	23.25	2	210413	6.54158e+06	16.5	378.55	NA	NA	NA	NA	NA	NA	NA
Empirical	MB	52	c	37.85	23.25	2	210414	6.54158e+06	24.5	497.75	NA	NA	NA	NA	NA	NA	NA
Empirical	MB	52	d	37.85	23.25	2	210414	6.54158e+06	33	624.4	NA	NA	NA	NA	NA	NA	NA
Empirical	MB	54	a	3.9	27.1	1	210412	6.54155e+06	7.5	244.45	NA	NA	NA	NA	NA	NA	NA
Empirical	MB	54	b	3.9	27.1	1	210412	6.54155e+06	11.5	304.05	NA	NA	NA	NA	NA	NA	NA
Empirical	MB	56	a	16.9	27	2	210415	6.54156e+06	17.5	393.45	NA	NA	NA	NA	NA	NA	NA
Empirical	MB	56	b	16.9	27	2	210415	6.54156e+06	10.5	289.15	NA	NA	NA	NA	NA	NA	NA
Empirical	MB	56	c	16.9	27	2	210415	6.54156e+06	21	445.6	87.86	0.16	4.3	2.03	NA	NA	NA
Empirical	MB	56	d	16.9	27	2	210415	6.54156e+06	35	654.2	NA	NA	NA	NA	NA	NA	NA
Empirical	MB	61	a	51.55	28.5	1	210422	6.54159e+06	18	400.9	NA	NA	NA	NA	NA	0.99	0.05
Empirical	MB	61	b	51.55	28.5	1	210422	6.54159e+06	13	326.4	NA	NA	NA	NA	NA	0.51	0.03
Empirical	MB	62	a	57.95	25.9	1	210414	6.54157e+06	13	326.4	NA	NA	NA	NA	NA	NA	NA
Empirical	MB	62	b	57.95	25.9	1	210414	6.54157e+06	21	445.6	NA	NA	NA	NA	NA	NA	NA
Empirical	MB	69	a	43.24	30.8	1	210424	6.54158e+06	35	654.2	NA	NA	NA	NA	NA	NA	NA
Empirical	MB	69	b	43.24	30.8	1	210424	6.54159e+06	37.5	691.45	NA	NA	NA	NA	NA	NA	NA
Empirical	MB	70	a	41.24	30.75	1	210424	6.54159e+06	NA	NA	NA	NA	NA	NA	43.86	0.71	0.05
Empirical	MB	70	b	41.24	30.75	1	210424	6.54159e+06	NA	NA	NA	NA	NA	NA	44.13	0.83	0.04
Empirical	MB	74	a	9.35	38.34	2	210423	6.54155e+06	18	400.9	59.71	0.15	4.3	2.37	NA	0.81	0.04
Empirical	MB	74	b	9.35	38.34	2	210423	6.54155e+06	13	326.4	NA	NA	NA	NA	NA	0.49	0.03
Empirical	MB	74	c	9.35	38.34	2	210423	6.54155e+06	9.5	274.25	46.82	0.14	4.3	2.62	NA	0.72	0.04
Empirical	MB	74	center	9.35	38.34	2	210423	6.54155e+06	NA	NA	NA	NA	NA	NA	NA	NA	NA
Empirical	MB	74	d	9.35	38.34	2	210424	6.54155e+06	18.5	408.35	64.31	0.16	4.4	2.5	NA	0.5	0.03
Empirical	MB	80	a	45.5	36.55	1	210429	6.54158e+06	20	430.7	80.56	0.17	4.3	2.4	NA	NA	NA
Empirical	MB	80	b	45.5	36.55	1	210429	6.54158e+06	9.5	274.25	NA	NA	NA	NA	NA	NA	NA
Empirical	MB	81	a	47	40	1	210433	6.54158e+06	22	460.5	NA	NA	NA	NA	NA	NA	NA
Empirical	MB	81	b	47	40	1	210433	6.54158e+06	20.5	438.15	NA	NA	NA	NA	NA	NA	NA
Empirical	MB	82	a	50.51	38.37	1	210432	6.54158e+06	19	415.8	100.71	0.19	4.3	2.52	NA	NA	NA
Empirical	MB	82	b	50.51	38.37	1	210432	6.54158e+06	18	400.9	NA	NA	NA	NA	NA	NA	NA
Empirical	MB	85	a	0.72	42.3	1	210428	6.54154e+06	12	311.5	89.78	0.16	4	2.5	NA	0.7	0.04
Empirical	MB	85	b	0.72	42.3	1	210428	6.54154e+06	10	281.7	87.98	0.16	4.1	2.45	NA	0.87	0.04
Empirical	MB	88	a	17.5	42	1	210431	6.54155e+06	18.5	408.35	NA	NA	NA	NA	NA	0.47	0.03
Empirical	MB	88	b	17.5	42	1	210431	6.54155e+06	14	341.3	NA	NA	NA	NA	NA	0.62	0.03
Empirical	MB	89	a	29.2	40.75	1	210430	6.54156e+06	18	400.9	89.48	0.15	4.3	2.39	NA	NA	NA
Empirical	MB	89	b	29.2	40.75	1	210430	6.54156e+06	13.5	333.85	NA	NA	NA	NA	NA	NA	NA
Empirical	MB	90	a	33.85	43.3	1	210433	6.54157e+06	16.5	378.55	NA	NA	NA	NA	NA	NA	NA
Empirical	MB	90	b	33.85	43.3	1	210433	6.54157e+06	22	460.5	NA	NA	NA	NA	NA	NA	NA
Empirical	MB	92	a	38.9	41.65	2	210433	6.54157e+06	8	251.9	61.63	0.17	4.3	2.5	44.42	0.71	0.04
Empirical	MB	92	b	38.9	41.65	2	210433	6.54157e+06	13	326.4	NA	NA	NA	NA	45.34	0.8	0.05
Empirical	MB	92	c	38.9	41.65	2	210434	6.54158e+06	24.5	497.75	NA	NA	NA	NA	44.67	0.56	0.03
Empirical	MB	92	center	38.9	41.65	2	210433	6.54157e+06	NA	NA	NA	NA	NA	NA	NA	NA	NA
Empirical	MB	92	d	38.9	41.65	2	210434	6.54157e+06	34.5	646.75	NA	NA	NA	NA	45.07	0.5	0.03
Empirical	MB	93	a	53.75	43.2	2	210437	6.54159e+06	43.2	776.38	NA	NA	NA	NA	NA	0.48	0.03
Empirical	MB	93	b	53.75	43.2	2	210437	6.54159e+06	15	356.2	NA	NA	NA	NA	NA	0.78	0.04
Empirical	MB	93	c	53.75	43.2	2	210437	6.54159e+06	15.5	363.65	79.68	0.17	4.3	2.59	NA	0.48	0.03
Empirical	MB	93	center	53.75	43.2	2	210437	6.54159e+06	NA	NA	NA	NA	NA	NA	NA	NA	NA
Empirical	MB	93	d	53.75	43.2	2	210438	6.54159e+06	16.5	378.55	NA	NA	NA	NA	NA	0.64	0.04
Empirical	MB	94	a	57.2	43	1	210439	6.54159e+06	24	490.3	NA	NA	NA	NA	NA	NA	NA
Empirical	MB	94	b	57.2	43	1	210439	6.54159e+06	20	430.7	NA	NA	NA	NA	NA	NA	NA
Empirical	MB	98	a	27.67	46.65	4	210434	6.54156e+06	22	460.5	103.87	0.18	4.1	2.42	NA	0.61	0.03
Empirical	MB	98	b	27.67	46.65	4	210435	6.54156e+06	13	326.4	76.36	0.18	4	2.63	NA	0.8	0.05
Empirical	MB	98	c	27.67	46.65	4	210435	6.54156e+06	9.5	274.25	NA	NA	NA	NA	NA	0.57	0.04
Empirical	MB	98	center	27.67	46.65	4	210435	6.54156e+06	NA	NA	NA	NA	NA	NA	NA	NA	NA
Empirical	MB	98	d	27.67	46.65	4	210435	6.54156e+06	16	371.1	NA	NA	NA	NA	NA	0.58	0.03
Empirical	MB	98	e	27.67	46.65	4	210435	6.54156e+06	11	296.6	NA	NA	NA	NA	NA	0.71	0.05
Empirical	MB	98	f	27.67	46.65	4	210436	6.54156e+06	20.5	438.15	NA	NA	NA	NA	NA	0.71	0.06
Empirical	MB	98	g	27.67	46.65	4	210436	6.54156e+06	13.5	333.85	37.61	0.18	3.9	2.65	NA	0.77	0.04
Empirical	MB	98	h	27.67	46.65	4	210436	6.54156e+06	34	639.3	111.87	0.2	3.9	2.59	NA	0.81	0.04
Empirical	MB	99	a	32.05	46.1	1	210437	6.54157e+06	16.5	378.55	80.06	0.16	4.3	2.45	NA	NA	NA
Empirical	MB	99	b	32.05	46.1	1	210437	6.54157e+06	13.5	333.85	NA	NA	NA	NA	NA	NA	NA
Empirical	MB	103	a	58.75	47.88	1	210443	6.54159e+06	17.5	393.45	NA	NA	NA	NA	NA	NA	NA
Empirical	MB	103	b	58.75	47.88	1	210443	6.54159e+06	17	386	NA	NA	NA	NA	NA	NA	NA
Empirical	MB	109	a	26.1	54.15	2	210442	6.54156e+06	38	698.9	NA	NA	NA	NA	NA	NA	NA
Empirical	MB	109	b	26.1	54.15	2	210442	6.54156e+06	34	639.3	NA	NA	NA	NA	NA	NA	NA
Empirical	MB	109	c	26.1	54.15	2	210442	6.54156e+06	NA	NA	NA	NA	NA	NA	NA	NA	NA
Empirical	MB	109	center	26.1	54.15	2	210442	6.54156e+06	NA	NA	NA	NA	NA	NA	NA	NA	NA
Empirical	MB	109	d	26.1	54.15	2	210443	6.54156e+06	NA	NA	NA	NA	NA	NA	NA	NA	NA
Empirical	MB	115	a	54.57	54.58	1	210446	6.54158e+06	18	400.9	NA	NA	NA	NA	NA	NA	NA
Empirical	MB	115	b	54.57	54.58	1	210445	6.54158e+06	34	639.3	97.38	0.19	4.4	2.62	NA	NA	NA
Empirical	MB	116	a	1	59.7	1	210443	6.54154e+06	27	535	NA	NA	NA	NA	NA	NA	NA
Empirical	MB	116	b	1	59.7	1	210443	6.54154e+06	20.5	438.15	NA	NA	NA	NA	NA	NA	NA
Empirical	MB	123	a	55.56	37.35	4	210432	6.54159e+06	18	400.9	104.79	0.19	4.5	2.57	NA	0.69	0.05
Empirical	MB	123	b	55.56	37.35	4	210432	6.54159e+06	23	475.4	93.58	0.17	4.4	2.57	NA	0.59	0.04
Empirical	MB	123	c	55.56	37.35	4	210432	6.54159e+06	33	624.4	88.27	0.17	4.4	2.58	NA	1.47	0.05
Empirical	MB	123	center	55.56	37.35	4	210433	6.54159e+06	NA	NA	NA	NA	NA	NA	NA	NA	NA
Empirical	MB	123	d	55.56	37.35	4	210432	6.54159e+06	15	356.2	87.23	0.16	4.4	2.5	NA	0.77	0.04
Empirical	MB	123	e	55.56	37.35	4	210433	6.54159e+06	40.5	736.15	101.33	0.19	4.3	2.64	NA	0.85	0.05
Empirical	MB	123	f	55.56	37.35	4	210433	6.54159e+06	12	311.5	NA	NA	NA	NA	NA	0.82	0.05
Empirical	MB	123	g	55.56	37.35	4	210433	6.54159e+06	38	698.9	102.53	0.18	4.3	2.56	NA	0.95	0.05
Empirical	MB	123	h	55.56	37.35	4	210433	6.54159e+06	24.5	497.75	NA	NA	NA	NA	NA	NA	NA
Empirical	MB	125	a	46.6	56.25	1	210447	6.54157e+06	24	490.3	NA	NA	NA	NA	NA	NA	NA
Empirical	MB	125	b	46.6	56.25	1	210447	6.54157e+06	16	371.1	NA	NA	NA	NA	NA	NA	NA
Empirical	MB	126	a	55.5	55.5	1	210449	6.54159e+06	19	415.8	NA	NA	NA	NA	44.65	0.55	0.02
Empirical	MB	126	b	55.5	55.5	1	210448	6.54159e+06	21	445.6	NA	NA	NA	NA	46	1.05	0.05
Empirical	MB	127	a	13.2	8.6	1	210392	6.54156e+06	16	371.1	NA	NA	NA	NA	NA	NA	NA
Empirical	MB	127	b	13.2	8.6	1	210392	6.54156e+06	12	311.5	NA	NA	NA	NA	NA	NA	NA
Empirical	MC	1	a	4	1	1	210530	6.54151e+06	33.5	631.85	NA	NA	NA	NA	45.61	0.82	0.06
Empirical	MC	1	b	4	1	1	210531	6.54151e+06	31.5	602.05	NA	NA	NA	NA	44.43	0.36	0.04
Empirical	MC	3	a	11.4	1.7	1	210537	6.54151e+06	16	371.1	NA	NA	NA	NA	NA	NA	NA
Empirical	MC	3	b	11.4	1.7	1	210538	6.54151e+06	29.5	572.25	NA	NA	NA	NA	NA	NA	NA
Empirical	MC	6	a	27.29	13.05	1	210563	6.54152e+06	16	371.1	NA	NA	NA	NA	NA	NA	NA
Empirical	MC	6	b	27.29	13.05	1	210563	6.54152e+06	17	386	NA	NA	NA	NA	NA	NA	NA
Empirical	MC	12	a	58.45	3.82	2	210588	6.5415e+06	20	430.7	NA	NA	NA	NA	NA	NA	NA
Empirical	MC	12	b	58.45	3.82	2	210588	6.5415e+06	19	415.8	NA	NA	NA	NA	NA	NA	NA
Empirical	MC	12	c	58.45	3.82	2	210589	6.5415e+06	19.5	423.25	NA	NA	NA	NA	NA	NA	NA
Empirical	MC	12	center	58.45	3.82	2	210588	6.5415e+06	NA	NA	NA	NA	NA	NA	NA	NA	NA
Empirical	MC	12	d	58.45	3.82	2	210589	6.5415e+06	16	371.1	NA	NA	NA	NA	NA	NA	NA
Empirical	MC	13	a	8.65	13.2	1	210536	6.54152e+06	45	803.2	NA	NA	NA	NA	NA	NA	NA
Empirical	MC	13	b	8.65	13.2	1	210536	6.54152e+06	40	728.7	NA	NA	NA	NA	NA	NA	NA
Empirical	MC	15	a	21.72	8.3	1	210551	6.54151e+06	24.5	497.75	NA	NA	NA	NA	NA	NA	NA
Empirical	MC	15	b	21.72	8.3	1	210552	6.54151e+06	18.5	408.35	NA	NA	NA	NA	NA	NA	NA
Empirical	MC	16	a	8.05	31.61	1	210537	6.54154e+06	23.5	482.85	NA	NA	NA	NA	NA	NA	NA
Empirical	MC	16	b	8.05	31.61	1	210537	6.54154e+06	29	564.8	NA	NA	NA	NA	NA	NA	NA
Empirical	MC	18	a	7.2	46.4	1	210536	6.54155e+06	16.5	378.55	NA	NA	NA	NA	NA	NA	NA
Empirical	MC	18	b	7.2	46.4	1	210537	6.54155e+06	17.5	393.45	NA	NA	NA	NA	NA	NA	NA
Empirical	MC	20	a	13.39	7.63	1	210540	6.54151e+06	19.4	421.76	NA	NA	NA	NA	NA	NA	NA
Empirical	MC	20	b	13.39	7.63	1	210541	6.54151e+06	24	490.3	NA	NA	NA	NA	NA	NA	NA
Empirical	MC	21	a	10.35	5.7	1	210537	6.54151e+06	35	654.2	265.46	0.18	3.8	2.57	NA	0.92	0.06
Empirical	MC	21	b	10.35	5.7	1	210537	6.54151e+06	29	564.8	114.38	0.17	4.3	2.57	NA	0.86	0.05
Empirical	MC	29	a	11.7	47.3	4	210546	6.54155e+06	26.5	527.55	138.57	0.19	4.5	2.43	NA	0.97	0.06
Empirical	MC	29	b	11.7	47.3	4	210546	6.54155e+06	26.5	527.55	117.29	0.22	4.2	2.44	NA	0.67	0.05
Empirical	MC	29	c	11.7	47.3	4	210547	6.54155e+06	13	326.4	93.71	0.2	4.3	2.46	NA	0.63	0.04
Empirical	MC	29	center	11.7	47.3	4	210547	6.54155e+06	NA	NA	NA	NA	NA	NA	NA	NA	NA
Empirical	MC	29	d	11.7	47.3	4	210547	6.54155e+06	33.5	631.85	236.89	0.18	4.2	2.57	NA	2.33	0.09
Empirical	MC	29	e	11.7	47.3	4	210547	6.54155e+06	20.5	438.15	144.95	0.21	4.2	2.49	NA	0.48	0.05
Empirical	MC	29	f	11.7	47.3	4	210547	6.54155e+06	20	430.7	122.25	0.25	4.2	2.63	NA	0.69	0.04
Empirical	MC	29	g	11.7	47.3	4	210548	6.54155e+06	24	490.3	84.72	0.18	4.2	2.6	NA	0.76	0.05
Empirical	MC	29	h	11.7	47.3	4	210548	6.54155e+06	18	400.9	82.57	0.14	4.2	2.41	NA	0.69	0.06
Empirical	MC	32	a	17.9	2.85	4	210544	6.54151e+06	26	520.1	NA	NA	NA	NA	NA	NA	NA
Empirical	MC	32	b	17.9	2.85	4	210545	6.54151e+06	18.5	408.35	NA	NA	NA	NA	NA	NA	NA
Empirical	MC	32	c	17.9	2.85	4	210545	6.54151e+06	14.5	348.75	NA	NA	NA	NA	NA	NA	NA
Empirical	MC	32	center	17.9	2.85	4	210545	6.54151e+06	NA	NA	NA	NA	NA	NA	NA	NA	NA
Empirical	MC	32	d	17.9	2.85	4	210545	6.54151e+06	29	564.8	NA	NA	NA	NA	NA	NA	NA
Empirical	MC	32	e	17.9	2.85	4	210545	6.54151e+06	18.5	408.35	NA	NA	NA	NA	NA	NA	NA
Empirical	MC	32	f	17.9	2.85	4	210546	6.54151e+06	25.5	512.65	NA	NA	NA	NA	NA	NA	NA
Empirical	MC	32	g	17.9	2.85	4	210546	6.54151e+06	19	415.8	NA	NA	NA	NA	NA	NA	NA
Empirical	MC	32	h	17.9	2.85	4	210546	6.54151e+06	21	445.6	NA	NA	NA	NA	NA	0.43	0.03
Empirical	MC	34	a	18.85	8.6	1	210547	6.54151e+06	13.9	339.81	NA	NA	NA	NA	NA	NA	NA
Empirical	MC	34	b	18.85	8.6	1	210546	6.54151e+06	18.9	414.31	NA	NA	NA	NA	NA	NA	NA
Empirical	MC	37	a	17.47	22.25	2	210548	6.54153e+06	21.5	453.05	NA	NA	NA	NA	NA	NA	NA
Empirical	MC	37	b	17.47	22.25	2	210548	6.54153e+06	17	386	NA	NA	NA	NA	NA	NA	NA
Empirical	MC	37	c	17.47	22.25	2	210548	6.54153e+06	12	311.5	NA	NA	NA	NA	NA	NA	NA
Empirical	MC	37	center	17.47	22.25	2	210548	6.54153e+06	NA	NA	NA	NA	NA	NA	NA	NA	NA
Empirical	MC	37	d	17.47	22.25	2	210548	6.54153e+06	11	296.6	NA	NA	NA	NA	NA	NA	NA
Empirical	MC	38	a	16.1	25.55	2	210546	6.54153e+06	20.5	438.15	NA	NA	NA	NA	NA	NA	NA
Empirical	MC	38	b	16.1	25.55	2	210547	6.54153e+06	24.5	497.75	NA	NA	NA	NA	NA	NA	NA
Empirical	MC	38	c	16.1	25.55	2	210547	6.54153e+06	22.5	467.95	NA	NA	NA	NA	NA	NA	NA
Empirical	MC	38	center	16.1	25.55	2	210547	6.54153e+06	NA	NA	NA	NA	NA	NA	NA	NA	NA
Empirical	MC	38	d	16.1	25.55	2	210547	6.54153e+06	28.5	557.35	NA	NA	NA	NA	NA	NA	NA
Empirical	MC	42	a	16.62	53.9	1	210551	6.54156e+06	23	475.4	160.77	0.2	4.2	2.59	NA	0.56	0.04
Empirical	MC	42	b	16.62	53.9	1	210551	6.54156e+06	23.5	482.85	NA	NA	NA	NA	NA	0.57	0.04
Empirical	MC	49	a	24.2	15.86	1	210557	6.54153e+06	29.5	572.25	NA	NA	NA	NA	NA	NA	NA
Empirical	MC	49	b	24.2	15.86	1	210557	6.54153e+06	23	475.4	NA	NA	NA	NA	NA	NA	NA
Empirical	MC	52	a	23.25	37.85	2	210557	6.54155e+06	11	296.6	NA	NA	NA	NA	NA	NA	NA
Empirical	MC	52	b	23.25	37.85	2	210558	6.54155e+06	18	400.9	NA	NA	NA	NA	NA	NA	NA
Empirical	MC	52	c	23.25	37.85	2	210558	6.54155e+06	24	490.3	NA	NA	NA	NA	NA	NA	NA
Empirical	MC	52	center	23.25	37.85	2	210558	6.54155e+06	NA	NA	NA	NA	NA	NA	NA	NA	NA
Empirical	MC	52	d	23.25	37.85	2	210558	6.54155e+06	20	430.7	91.55	0.16	3.8	2.64	NA	NA	NA
Empirical	MC	54	a	27.1	3.9	1	210561	6.54151e+06	22	460.5	NA	NA	NA	NA	NA	NA	NA
Empirical	MC	54	b	27.1	3.9	1	210561	6.54151e+06	23.5	482.85	NA	NA	NA	NA	NA	NA	NA
Empirical	MC	56	a	27	6.9	2	210562	6.54151e+06	18.5	408.35	NA	NA	NA	NA	NA	NA	NA
Empirical	MC	56	b	27	6.9	2	210562	6.54151e+06	18.5	408.35	NA	NA	NA	NA	NA	NA	NA
Empirical	MC	56	c	27	6.9	2	210562	6.54151e+06	21	445.6	NA	NA	NA	NA	NA	NA	NA
Empirical	MC	56	center	27	6.9	2	210562	6.54151e+06	NA	NA	NA	NA	NA	NA	NA	NA	NA
Empirical	MC	56	d	27	6.9	2	210563	6.54151e+06	24	490.3	NA	NA	NA	NA	NA	NA	NA
Empirical	MC	61	a	28.5	51.55	1	210567	6.54156e+06	24.5	497.75	NA	NA	NA	NA	NA	NA	NA
Empirical	MC	61	b	28.5	51.55	1	210567	6.54156e+06	23.5	482.85	NA	NA	NA	NA	NA	NA	NA
Empirical	MC	62	a	25.9	57.95	1	210565	6.54156e+06	15.5	363.65	127.7	0.24	4	2.6	NA	NA	NA
Empirical	MC	62	b	25.9	57.95	1	210565	6.54156e+06	19.5	423.25	43.39	0.18	4.3	2.57	NA	0.61	0.07
Empirical	MC	69	a	30.8	43.24	1	210570	6.54155e+06	33	624.4	NA	NA	NA	NA	NA	NA	NA
Empirical	MC	69	b	30.8	43.24	1	210570	6.54155e+06	29	564.8	NA	NA	NA	NA	NA	0.63	0.05
Empirical	MC	70	a	30.75	41.24	1	210569	6.54155e+06	25.5	512.65	NA	NA	NA	NA	44.24	0.68	0.04
Empirical	MC	70	b	30.75	41.24	1	210569	6.54155e+06	33.5	631.85	91.89	0.15	4.1	2.63	44.77	0.68	0.05
Empirical	MC	74	a	38.34	9.35	2	210571	6.54152e+06	17	386	NA	NA	NA	NA	NA	0.88	0.05
Empirical	MC	74	b	38.34	9.35	2	210571	6.54152e+06	20	430.7	119.38	0.22	4.1	2.65	NA	0.53	0.04
Empirical	MC	74	c	38.34	9.35	2	210571	6.54152e+06	17	386	58.36	0.16	4.3	2.55	NA	0.71	0.04
Empirical	MC	74	center	38.34	9.35	2	210571	6.54152e+06	NA	NA	NA	NA	NA	NA	NA	NA	NA
Empirical	MC	74	d	38.34	9.35	2	210572	6.54152e+06	20	430.7	81.37	0.17	4.2	2.48	NA	0.86	0.06
Empirical	MC	80	a	36.55	45.5	1	210574	6.54156e+06	23	475.4	NA	NA	NA	NA	NA	0.63	0.05
Empirical	MC	80	b	36.55	45.5	1	210574	6.54156e+06	19	415.8	NA	NA	NA	NA	NA	NA	NA
Empirical	MC	81	a	40	47	1	210583	6.54155e+06	22.5	467.95	NA	NA	NA	NA	NA	NA	NA
Empirical	MC	81	b	40	47	1	210583	6.54155e+06	20	430.7	NA	NA	NA	NA	NA	NA	NA
Empirical	MC	82	a	38.3	50.51	1	210576	6.54156e+06	25.5	512.65	NA	NA	NA	NA	NA	NA	NA
Empirical	MC	82	b	38.3	50.51	1	210576	6.54156e+06	14.5	348.75	91.98	0.19	3.9	2.64	NA	NA	NA
Empirical	MC	85	a	42.3	0.72	1	210575	6.5415e+06	26	520.1	82.18	0.21	4.3	2.61	NA	0.62	0.04
Empirical	MC	85	b	42.3	0.72	1	210576	6.5415e+06	24	490.3	97.81	0.22	3.8	2.5	NA	0.64	0.05
Empirical	MC	88	a	42	17.5	1	210576	6.54152e+06	NA	NA	77.22	0.18	4.2	2.7	44.19	0.88	0.04
Empirical	MC	88	b	42	17.5	1	210576	6.54152e+06	NA	NA	99.08	0.16	3.8	2.51	44.4	0.86	0.05
Empirical	MC	89	a	40.75	29.2	1	210576	6.54153e+06	NA	NA	NA	NA	NA	NA	NA	NA	NA
Empirical	MC	89	b	40.75	29.2	1	210576	6.54153e+06	NA	NA	NA	NA	NA	NA	NA	NA	NA
Empirical	MC	90	a	43.3	33.85	1	210579	6.54153e+06	NA	NA	NA	NA	NA	NA	NA	NA	NA
Empirical	MC	90	b	43.3	33.85	1	210579	6.54153e+06	NA	NA	NA	NA	NA	NA	NA	NA	NA
Empirical	MC	92	a	41.65	38.9	2	210578	6.54155e+06	21	445.6	NA	NA	NA	NA	NA	NA	NA
Empirical	MC	92	b	41.65	38.9	2	210578	6.54155e+06	19.5	423.25	NA	NA	NA	NA	NA	NA	NA
Empirical	MC	92	c	41.65	38.9	2	210578	6.54155e+06	24	490.3	NA	NA	NA	NA	NA	NA	NA
Empirical	MC	92	center	41.65	38.9	2	210578	6.54155e+06	NA	NA	NA	NA	NA	NA	NA	NA	NA
Empirical	MC	92	d	41.65	38.9	2	210579	6.54155e+06	22	460.5	NA	NA	NA	NA	NA	NA	NA
Empirical	MC	93	a	43.2	53.25	2	210581	6.54156e+06	17	386	NA	NA	NA	NA	NA	0.75	0.05
Empirical	MC	93	b	43.2	53.25	2	210582	6.54156e+06	18.5	408.35	56.03	0.16	4.2	2.61	NA	0.56	0.05
Empirical	MC	93	c	43.2	53.25	2	210582	6.54156e+06	24	490.3	NA	NA	NA	NA	NA	0.52	0.03
Empirical	MC	93	center	43.2	53.25	2	210582	6.54156e+06	NA	NA	NA	NA	NA	NA	NA	NA	NA
Empirical	MC	93	d	43.2	53.25	2	210582	6.54156e+06	28	549.9	80.34	0.15	4.2	2.63	NA	0.41	0.03
Empirical	MC	94	a	43	57.2	1	210586	6.54156e+06	NA	NA	NA	NA	NA	NA	NA	NA	NA
Empirical	MC	94	b	43	57.2	1	210585	6.54156e+06	NA	NA	NA	NA	NA	NA	NA	NA	NA
Empirical	MC	98	a	46.65	27.67	4	210583	6.54153e+06	18.5	408.35	NA	NA	NA	NA	NA	0.61	0.06
Empirical	MC	98	b	46.65	27.67	4	210583	6.54153e+06	25	505.2	78.49	0.17	3.8	2.46	NA	0.86	0.04
Empirical	MC	98	c	46.65	27.67	4	210584	6.54153e+06	17	386	63.94	0.17	4.2	2.61	NA	0.68	0.04
Empirical	MC	98	d	46.65	27.67	4	210584	6.54153e+06	18	400.9	NA	NA	NA	NA	NA	0.63	0.06
Empirical	MC	98	e	46.65	27.67	4	210584	6.54153e+06	28	549.9	76.92	0.16	4.3	2.59	NA	0.9	0.04
Empirical	MC	98	f	46.65	27.67	4	210584	6.54153e+06	22	460.5	NA	NA	NA	NA	NA	0.97	0.04
Empirical	MC	98	g	46.65	27.67	4	210585	6.54153e+06	20	430.7	NA	NA	NA	NA	NA	0.74	0.04
Empirical	MC	98	h	46.65	27.67	4	210585	6.54153e+06	13	326.4	85.27	0.18	3.9	2.66	NA	0.68	0.04
Empirical	MC	99	a	46.1	32.05	1	210581	6.54154e+06	18.5	408.35	NA	NA	NA	NA	NA	NA	NA
Empirical	MC	99	b	46.1	32.05	1	210581	6.54154e+06	NA	NA	NA	NA	NA	NA	NA	NA	NA
Empirical	MC	103	a	47.88	58.75	1	210589	6.54156e+06	NA	NA	NA	NA	NA	NA	NA	NA	NA
Empirical	MC	103	b	47.88	58.75	1	210589	6.54156e+06	NA	NA	NA	NA	NA	NA	NA	NA	NA
Empirical	MC	109	a	54.15	26.1	1	210588	6.54153e+06	14	341.3	NA	NA	NA	NA	NA	NA	NA
Empirical	MC	109	b	54.15	26.1	1	210587	6.54153e+06	18	400.9	NA	NA	NA	NA	NA	NA	NA
Empirical	MC	115	a	54.58	54.57	1	210591	6.54156e+06	21	445.6	NA	NA	NA	NA	NA	NA	NA
Empirical	MC	115	b	54.58	54.57	1	210591	6.54156e+06	18.5	408.35	NA	NA	NA	NA	NA	NA	NA
Empirical	MC	116	a	59.7	1	1	210589	6.5415e+06	23	475.4	NA	NA	NA	NA	NA	NA	NA
Empirical	MC	116	b	59.7	1	1	210589	6.5415e+06	21	445.6	NA	NA	NA	NA	NA	NA	NA
Empirical	MC	123	a	55.56	31.35	4	210591	6.54155e+06	22.5	467.95	128.42	0.18	4.2	2.58	44.67	0.88	0.08
Empirical	MC	123	b	55.56	31.35	4	210591	6.54155e+06	29	564.8	147.83	0.16	3.8	2.45	46	0.98	0.05
Empirical	MC	123	c	55.56	31.35	4	210591	6.54155e+06	17.5	393.45	56.27	0.16	4.2	2.49	44.95	0.98	0.04
Empirical	MC	123	d	55.56	31.35	4	210591	6.54155e+06	23	475.4	92.2	0.15	4.2	2.45	44.77	0.7	0.07
Empirical	MC	123	e	55.56	31.35	4	210592	6.54155e+06	23	475.4	NA	NA	NA	NA	NA	0.55	0.02
Empirical	MC	123	f	55.56	31.35	4	210592	6.54155e+06	11	296.6	68.72	0.18	4.5	2.62	NA	0.94	0.05
Empirical	MC	123	g	55.56	31.35	4	210592	6.54155e+06	10.5	289.15	69.73	0.17	4.4	2.5	NA	0.78	0.04
Empirical	MC	123	h	55.56	31.35	4	210592	6.54155e+06	32	609.5	212.74	0.19	4.3	2.5	NA	0.8	0.05
Empirical	MC	125	a	56.25	46.6	1	210593	6.54155e+06	12	311.5	NA	NA	NA	NA	NA	NA	NA
Empirical	MC	125	b	56.25	46.6	1	210593	6.54155e+06	15	356.2	NA	NA	NA	NA	NA	NA	NA
Empirical	MC	126	a	55.5	55.5	1	210593	6.54156e+06	22	460.5	80.63	0.18	4.2	2.52	NA	NA	NA
Empirical	MC	126	b	55.5	55.5	1	210593	6.54156e+06	17	386	63.87	0.15	4.3	2.41	NA	NA	NA
Empirical	MD	1	a	4	1	1	210547	6.5416e+06	20	430.7	NA	NA	NA	NA	44.26	0.58	0.03
Empirical	MD	1	b	4	1	1	210548	6.5416e+06	25	505.2	NA	NA	NA	NA	46.45	1.05	0.07
Empirical	MD	3	a	11.4	1.7	1	210556	6.5416e+06	17	386	NA	NA	NA	NA	NA	0.75	0.05
Empirical	MD	3	b	11.4	1.7	1	210556	6.54159e+06	17	386	NA	NA	NA	NA	NA	0.77	0.06
Empirical	MD	6	a	27.29	13.05	1	210574	6.5416e+06	18	400.9	NA	NA	NA	NA	NA	0.73	0.04
Empirical	MD	6	b	27.29	13.05	1	210573	6.5416e+06	23.5	482.85	NA	NA	NA	NA	NA	0.8	0.09
Empirical	MD	12	a	58.45	3.82	2	210602	6.54159e+06	14.5	348.75	NA	NA	NA	NA	NA	0.96	0.08
Empirical	MD	12	b	58.45	3.82	2	210603	6.54159e+06	20.5	438.15	NA	NA	NA	NA	NA	1.25	0.07
Empirical	MD	12	c	58.45	3.82	2	210603	6.54159e+06	13.5	333.85	NA	NA	NA	NA	NA	0.86	0.06
Empirical	MD	12	center	58.45	3.82	2	210603	6.54159e+06	NA	NA	NA	NA	NA	NA	NA	NA	NA
Empirical	MD	12	d	58.45	3.82	2	210603	6.54159e+06	16	371.1	NA	NA	NA	NA	NA	0.75	0.05
Empirical	MD	13	a	8.65	13.2	1	210554	6.5416e+06	10	281.7	NA	NA	NA	NA	NA	0.65	0.08
Empirical	MD	13	b	8.65	13.2	1	210554	6.5416e+06	22	460.5	NA	NA	NA	NA	NA	0.81	0.19
Empirical	MD	15	a	21.72	8.3	1	210565	6.5416e+06	11.5	304.05	NA	NA	NA	NA	NA	0.86	0.07
Empirical	MD	15	b	21.72	8.3	1	210565	6.5416e+06	12	311.5	NA	NA	NA	NA	NA	0.75	0.13
Empirical	MD	16	a	8.05	31.61	1	210556	6.54162e+06	17.5	393.45	NA	NA	NA	NA	NA	0.94	0.07
Empirical	MD	16	b	8.05	31.61	1	210557	6.54162e+06	13.5	333.85	NA	NA	NA	NA	NA	0.77	0.08
Empirical	MD	18	a	7.2	46.4	1	210561	6.54164e+06	19	415.8	NA	NA	NA	NA	NA	0.76	0.06
Empirical	MD	18	b	7.2	46.4	1	210561	6.54164e+06	15	356.2	NA	NA	NA	NA	NA	0.83	0.08
Empirical	MD	20	a	13.39	7.63	1	210559	6.5416e+06	12.5	318.95	NA	NA	NA	NA	NA	0.52	0.06
Empirical	MD	20	b	13.39	7.63	1	210559	6.5416e+06	10	281.7	NA	NA	NA	NA	NA	0.8	0.05
Empirical	MD	21	a	10.35	5.7	1	210556	6.5416e+06	16	371.1	NA	NA	NA	NA	NA	0.9	0.12
Empirical	MD	21	b	10.35	5.7	1	210556	6.5416e+06	11.5	304.05	NA	NA	NA	NA	NA	0.93	0.05
Empirical	MD	29	a	11.7	47.3	4	210566	6.54164e+06	19.5	423.25	NA	NA	NA	NA	NA	0.99	0.05
Empirical	MD	29	b	11.7	47.3	4	210566	6.54164e+06	16	371.1	NA	NA	NA	NA	NA	0.81	0.08
Empirical	MD	29	c	11.7	47.3	4	210566	6.54164e+06	21.5	453.05	NA	NA	NA	NA	NA	1.19	0.09
Empirical	MD	29	d	11.7	47.3	4	210567	6.54164e+06	19.5	423.25	NA	NA	NA	NA	NA	0.76	0.06
Empirical	MD	29	e	11.7	47.3	4	210567	6.54164e+06	14	341.3	NA	NA	NA	NA	NA	0.77	0.09
Empirical	MD	29	f	11.7	47.3	4	210567	6.54164e+06	13	326.4	NA	NA	NA	NA	NA	0.85	0.1
Empirical	MD	29	g	11.7	47.3	4	210567	6541637	16.5	378.55	NA	NA	NA	NA	NA	0.99	0.13
Empirical	MD	29	h	11.7	47.3	4	210568	6.54164e+06	22.5	467.95	NA	NA	NA	NA	NA	0.56	0.05
Empirical	MD	32	a	17.9	0.85	4	210562	6.54159e+06	14	341.3	NA	NA	NA	NA	NA	0.86	0.07
Empirical	MD	32	b	17.9	0.85	4	210562	6.54159e+06	11.5	304.05	NA	NA	NA	NA	NA	0.98	0.08
Empirical	MD	32	c	17.9	0.85	4	210562	6.54159e+06	11	296.6	NA	NA	NA	NA	NA	1.04	0.05
Empirical	MD	32	d	17.9	0.85	4	210562	6.54159e+06	12	311.5	NA	NA	NA	NA	NA	0.91	0.12
Empirical	MD	32	e	17.9	0.85	4	210563	6.54159e+06	14.5	348.75	NA	NA	NA	NA	NA	0.77	0.08
Empirical	MD	32	f	17.9	0.85	4	210563	6.54159e+06	13.5	333.85	NA	NA	NA	NA	NA	0.71	0.06
Empirical	MD	32	g	17.9	0.85	4	210563	6.54159e+06	8	251.9	NA	NA	NA	NA	NA	0.64	0.07
Empirical	MD	32	h	17.9	0.85	4	210563	6.54159e+06	17.5	393.45	NA	NA	NA	NA	NA	0.62	0.03
Empirical	MD	34	a	18.85	8.6	1	210562	6.5416e+06	20	430.7	NA	NA	NA	NA	NA	0.79	0.03
Empirical	MD	34	b	18.85	8.6	1	210562	6.5416e+06	12.5	318.95	NA	NA	NA	NA	NA	0.87	0.04
Empirical	MD	37	a	17.47	22.25	2	210563	6.54162e+06	19	415.8	NA	NA	NA	NA	NA	0.84	0.11
Empirical	MD	37	b	17.47	22.25	2	210563	6.54162e+06	18.5	408.35	NA	NA	NA	NA	NA	1.04	0.09
Empirical	MD	37	c	17.47	22.25	2	210563	6.54162e+06	24	490.3	NA	NA	NA	NA	NA	0.84	0.07
Empirical	MD	37	center	17.47	22.25	2	210563	6.54162e+06	NA	NA	NA	NA	NA	NA	NA	NA	NA
Empirical	MD	37	d	17.47	22.25	2	210564	6.54162e+06	15	356.2	NA	NA	NA	NA	NA	0.68	0.04
Empirical	MD	38	a	16.1	25.55	2	210561	6.54162e+06	15.5	363.65	NA	NA	NA	NA	NA	0.69	0.06
Empirical	MD	38	b	16.1	25.55	2	210561	6.54162e+06	20	430.7	NA	NA	NA	NA	NA	0.73	0.07
Empirical	MD	38	c	16.1	25.55	2	210562	6.54162e+06	10.5	289.15	NA	NA	NA	NA	NA	0.97	0.07
Empirical	MD	38	center	16.1	25.55	2	210562	6.54162e+06	NA	NA	NA	NA	NA	NA	NA	NA	NA
Empirical	MD	38	d	16.1	25.55	2	210562	6.54162e+06	13	326.4	NA	NA	NA	NA	NA	0.89	0.08
Empirical	MD	42	a	16.62	53.9	1	210575	6.54164e+06	19	415.8	NA	NA	NA	NA	NA	0.66	0.04
Empirical	MD	42	b	16.62	53.9	1	210575	6.54164e+06	22.5	467.95	NA	NA	NA	NA	NA	0.57	0.06
Empirical	MD	49	a	24.2	15.86	1	210569	6.54161e+06	19	415.8	NA	NA	NA	NA	NA	0.68	0.06
Empirical	MD	49	b	24.2	15.86	1	210569	6.54161e+06	20.5	438.15	NA	NA	NA	NA	NA	1.1	0.09
Empirical	MD	52	a	23.25	37.85	2	210582	6.54163e+06	15.5	363.65	NA	NA	NA	NA	NA	0.71	0.08
Empirical	MD	52	b	23.25	37.85	2	210582	6.54163e+06	18.5	408.35	NA	NA	NA	NA	NA	0.68	0.13
Empirical	MD	52	c	23.25	37.85	2	210582	6.54163e+06	21	445.6	NA	NA	NA	NA	NA	0.73	0.06
Empirical	MD	52	center	23.25	37.85	2	210582	6.54163e+06	NA	NA	NA	NA	NA	NA	NA	NA	NA
Empirical	MD	52	d	23.25	37.85	2	210582	6.54163e+06	8	251.9	NA	NA	NA	NA	NA	0.55	0.06
Empirical	MD	54	a	27.1	3.9	1	210572	6.54159e+06	16	371.1	NA	NA	NA	NA	NA	0.92	0.06
Empirical	MD	54	b	27.1	3.9	1	210572	6.54159e+06	17	386	NA	NA	NA	NA	NA	0.98	0.08
Empirical	MD	56	a	27	6.9	2	210574	6.54161e+06	13.5	333.85	NA	NA	NA	NA	NA	0.68	0.04
Empirical	MD	56	b	27	6.9	2	210575	6.54161e+06	17.5	393.45	NA	NA	NA	NA	NA	0.73	0.06
Empirical	MD	56	c	27	6.9	2	210575	6.54161e+06	14	341.3	NA	NA	NA	NA	NA	0.71	0.06
Empirical	MD	56	center	27	6.9	2	210575	6.54161e+06	NA	NA	NA	NA	NA	NA	NA	NA	NA
Empirical	MD	56	d	27	6.9	2	210575	6.54161e+06	17	386	NA	NA	NA	NA	NA	0.98	0.07
Empirical	MD	61	a	28.5	51.55	1	210588	6.54164e+06	7.5	244.45	NA	NA	NA	NA	NA	0.74	0.04
Empirical	MD	61	b	28.5	51.55	1	210588	6.54164e+06	10	281.7	NA	NA	NA	NA	NA	0.85	0.04
Empirical	MD	62	a	25.9	57.95	1	210586	6.54165e+06	12	311.5	NA	NA	NA	NA	NA	0.65	0.04
Empirical	MD	62	b	25.9	57.95	1	210586	6.54165e+06	17	386	NA	NA	NA	NA	NA	0.45	0.03
Empirical	MD	69	a	30.8	43.24	1	210589	6.54163e+06	17	386	NA	NA	NA	NA	NA	0.67	0.04
Empirical	MD	69	b	30.8	43.24	1	210589	6.54163e+06	11	296.6	NA	NA	NA	NA	NA	0.9	0.06
Empirical	MD	70	a	30.75	41.24	1	210588	6.54163e+06	13.5	333.85	NA	NA	NA	NA	45.66	0.48	0.04
Empirical	MD	70	b	30.75	41.24	1	210588	6.54163e+06	9	266.8	NA	NA	NA	NA	45.27	0.56	0.04
Empirical	MD	74	a	38.34	9.35	2	210582	6.5416e+06	15	356.2	NA	NA	NA	NA	NA	0.91	0.09
Empirical	MD	74	b	38.34	9.35	2	210583	6.5416e+06	17.5	393.45	NA	NA	NA	NA	NA	0.83	0.1
Empirical	MD	74	c	38.34	9.35	2	210583	6.5416e+06	21	445.6	NA	NA	NA	NA	NA	0.93	0.05
Empirical	MD	74	center	38.34	9.35	2	210583	6.5416e+06	NA	NA	NA	NA	NA	NA	NA	NA	NA
Empirical	MD	74	d	38.34	9.35	2	210583	6.5416e+06	13.5	333.85	NA	NA	NA	NA	NA	0.9	0.05
Empirical	MD	80	a	36.55	45.5	1	210592	6.54163e+06	9	266.8	NA	NA	NA	NA	NA	0.6	0.05
Empirical	MD	80	b	36.55	45.5	1	210593	6.54163e+06	14	341.3	NA	NA	NA	NA	NA	0.68	0.05
Empirical	MD	81	a	40	47	1	210599	6.54163e+06	13	326.4	NA	NA	NA	NA	NA	0.7	0.07
Empirical	MD	81	b	40	47	1	210599	6.54163e+06	16	371.1	NA	NA	NA	NA	NA	0.71	0.07
Empirical	MD	82	a	38.3	50.51	1	210596	6.54164e+06	17	386	NA	NA	NA	NA	NA	0.73	0.05
Empirical	MD	82	b	38.3	50.51	1	210596	6.54164e+06	26	520.1	NA	NA	NA	NA	NA	0.84	0.04
Empirical	MD	85	a	42.3	0.72	1	210587	6.54159e+06	23.5	482.85	NA	NA	NA	NA	NA	0.88	0.06
Empirical	MD	85	b	42.3	0.72	1	210587	6.54159e+06	11	296.6	NA	NA	NA	NA	NA	0.87	0.1
Empirical	MD	88	a	42	17.5	1	210588	6.54161e+06	15	356.2	NA	NA	NA	NA	43.38	0.58	0.03
Empirical	MD	88	b	42	17.5	1	210588	6.54161e+06	12	311.5	NA	NA	NA	NA	43.92	0.52	0.04
Empirical	MD	89	a	40.75	29.2	1	210595	6.54162e+06	18	400.9	NA	NA	NA	NA	NA	1.19	0.04
Empirical	MD	89	b	40.75	29.2	1	210595	6.54162e+06	12	311.5	NA	NA	NA	NA	NA	0.79	0.06
Empirical	MD	90	a	43.3	33.85	1	210591	6.54162e+06	20.5	438.15	NA	NA	NA	NA	NA	0.55	0.04
Empirical	MD	90	b	43.3	33.85	1	210591	6.54162e+06	18.5	408.35	NA	NA	NA	NA	NA	0.51	0.04
Empirical	MD	92	a	41.65	38.9	2	210599	6.54163e+06	10	281.7	NA	NA	NA	NA	NA	0.85	0.06
Empirical	MD	92	b	41.65	38.9	2	210599	6.54163e+06	14.5	348.75	NA	NA	NA	NA	NA	0.68	0.03
Empirical	MD	92	c	41.65	38.9	2	210599	6.54163e+06	30	579.7	NA	NA	NA	NA	NA	0.78	0.04
Empirical	MD	92	center	41.65	38.9	2	210599	6.54163e+06	NA	NA	NA	NA	NA	NA	NA	NA	NA
Empirical	MD	92	d	41.65	38.9	2	210600	6.54163e+06	14.5	348.75	NA	NA	NA	NA	NA	0.78	0.05
Empirical	MD	93	a	43.2	53.25	2	210606	6.54164e+06	NA	NA	NA	NA	NA	NA	NA	0.94	0.05
Empirical	MD	93	b	43.2	53.25	2	210607	6.54164e+06	NA	NA	NA	NA	NA	NA	NA	0.84	0.07
Empirical	MD	93	c	43.2	53.25	2	210607	6.54164e+06	NA	NA	NA	NA	NA	NA	NA	0.73	0.05
Empirical	MD	93	center	43.2	53.25	2	210607	6.54164e+06	NA	NA	NA	NA	NA	NA	NA	NA	NA
Empirical	MD	93	d	43.2	53.25	2	210607	6.54164e+06	NA	NA	NA	NA	NA	NA	NA	0.67	0.05
Empirical	MD	94	a	43	57.2	1	210605	6.54164e+06	22	460.5	NA	NA	NA	NA	NA	0.84	0.07
Empirical	MD	94	b	43	57.2	1	210605	6.54164e+06	16	371.1	NA	NA	NA	NA	NA	0.73	0.06
Empirical	MD	98	a	46.65	27.67	4	210596	6.54162e+06	17	386	NA	NA	NA	NA	NA	0.78	0.08
Empirical	MD	98	b	46.65	27.67	4	210596	6.54162e+06	16	371.1	NA	NA	NA	NA	NA	0.64	0.05
Empirical	MD	98	c	46.65	27.67	4	210597	6.54162e+06	11.5	304.05	NA	NA	NA	NA	NA	0.83	0.06
Empirical	MD	98	d	46.65	27.67	4	210597	6.54162e+06	25	505.2	NA	NA	NA	NA	NA	0.54	0.05
Empirical	MD	98	e	46.65	27.67	4	210597	6.54162e+06	14.5	348.75	NA	NA	NA	NA	NA	0.64	0.03
Empirical	MD	98	f	46.65	27.67	4	210597	6.54162e+06	17.5	393.45	NA	NA	NA	NA	NA	0.7	0.05
Empirical	MD	98	g	46.65	27.67	4	210598	6.54162e+06	17	386	NA	NA	NA	NA	NA	0.64	0.04
Empirical	MD	98	h	46.65	27.67	4	210598	6.54162e+06	12.5	318.95	NA	NA	NA	NA	NA	0.6	0.04
Empirical	MD	99	a	46.1	32.05	1	210593	6.54162e+06	15.5	363.65	NA	NA	NA	NA	NA	0.8	0.07
Empirical	MD	99	b	46.1	32.05	1	210593	6.54162e+06	19	415.8	NA	NA	NA	NA	NA	0.52	0.04
Empirical	MD	103	a	47.88	58.75	1	210607	6.54164e+06	18.5	408.35	NA	NA	NA	NA	NA	0.61	0.04
Empirical	MD	103	b	47.88	58.75	1	210607	6.54164e+06	12	311.5	NA	NA	NA	NA	NA	0.66	0.05
Empirical	MD	109	a	54.15	26.1	1	210600	6.54161e+06	15	356.2	NA	NA	NA	NA	NA	0.76	0.07
Empirical	MD	109	b	54.15	26.1	1	210600	6.54161e+06	10	281.7	NA	NA	NA	NA	NA	0.79	0.06
Empirical	MD	115	a	54.58	54.57	1	210619	6.54163e+06	13	326.4	NA	NA	NA	NA	NA	0.88	0.12
Empirical	MD	115	b	54.58	54.57	1	210619	6.54163e+06	13	326.4	NA	NA	NA	NA	NA	0.73	0.03
Empirical	MD	116	a	59.7	1	1	210604	6.54159e+06	15	356.2	NA	NA	NA	NA	NA	0.91	0.06
Empirical	MD	116	b	59.7	1	1	210604	6.54159e+06	12	311.5	NA	NA	NA	NA	NA	0.93	0.04
Empirical	MD	123	a	55.56	31.35	4	210605	6.54162e+06	23.5	482.85	NA	NA	NA	NA	NA	0.86	0.07
Empirical	MD	123	b	55.56	31.35	4	210605	6.54162e+06	24	490.3	NA	NA	NA	NA	NA	0.86	0.06
Empirical	MD	123	c	55.56	31.35	4	210605	6.54162e+06	15	356.2	NA	NA	NA	NA	NA	0.52	0.04
Empirical	MD	123	d	55.56	31.35	4	210605	6.54162e+06	25	505.2	NA	NA	NA	NA	NA	0.82	0.11
Empirical	MD	123	e	55.56	31.35	4	210606	6.54162e+06	18	400.9	NA	NA	NA	NA	NA	0.69	0.09
Empirical	MD	123	f	55.56	31.35	4	210606	6.54162e+06	24	490.3	NA	NA	NA	NA	NA	0.61	0.05
Empirical	MD	123	g	55.56	31.35	4	210606	6.54162e+06	19	415.8	NA	NA	NA	NA	NA	0.52	0.04
Empirical	MD	123	h	55.56	31.35	4	210606	6.54162e+06	15.5	363.65	NA	NA	NA	NA	NA	0.87	0.11
Empirical	MD	125	a	56.25	46.6	1	210610	6.54163e+06	24	490.3	NA	NA	NA	NA	46.19	0.48	0.1
Empirical	MD	125	b	56.25	46.6	1	210611	6.54163e+06	22	460.5	NA	NA	NA	NA	47.4	1.38	0.12
Empirical	MD	126	a	55.5	55.5	1	210616	6.54164e+06	20.5	438.15	NA	NA	NA	NA	44.92	0.63	0.06
Empirical	MD	126	b	55.5	55.5	1	210616	6.54164e+06	12	311.5	NA	NA	NA	NA	44.36	0.68	0.07
Empirical	ME	4	a	13.5	1.4	1	210486	6.5416e+06	26	520.1	NA	NA	NA	NA	NA	0.55	0.04
Empirical	ME	4	b	13.5	1.4	1	210486	6.5416e+06	12.5	318.95	NA	NA	NA	NA	NA	0.51	0.05
Empirical	ME	8	a	28.3	2.75	1	210500	6.5416e+06	19	415.8	NA	NA	NA	NA	NA	0.55	0.03
Empirical	ME	8	b	28.3	2.75	1	210499	6.5416e+06	22	460.5	NA	NA	NA	NA	NA	0.71	0.04
Empirical	ME	9	a	27	1.5	2	210501	6.5416e+06	25	505.2	NA	NA	NA	NA	NA	0.58	0.06
Empirical	ME	9	b	27	1.5	2	210501	6.5416e+06	24.5	497.75	NA	NA	NA	NA	NA	0.67	0.06
Empirical	ME	9	c	27	1.5	2	210501	6.5416e+06	55	952.2	NA	NA	NA	NA	NA	0.61	0.06
Empirical	ME	9	center	27	1.5	2	210501	6.5416e+06	NA	NA	NA	NA	NA	NA	NA	NA	NA
Empirical	ME	9	d	27	1.5	2	210501	6.5416e+06	32	609.5	NA	NA	NA	NA	NA	0.83	0.04
Empirical	ME	12	a	57.1	1.9	2	210528	6.54159e+06	15.5	363.65	NA	NA	NA	NA	45.22	0.89	0.12
Empirical	ME	12	b	57.1	1.9	2	210529	6.54159e+06	14	341.3	NA	NA	NA	NA	46.21	0.96	0.1
Empirical	ME	12	c	57.1	1.9	2	210529	6.5416e+06	12.5	318.95	NA	NA	NA	NA	44.92	0.69	0.16
Empirical	ME	12	center	57.1	1.9	2	210529	6.54159e+06	NA	NA	NA	NA	NA	NA	NA	NA	NA
Empirical	ME	12	d	57.1	1.9	2	210529	6.54159e+06	24	490.3	NA	NA	NA	NA	44.18	0.46	0.04
Empirical	ME	13	a	11.3	8.5	1	210486	6.54161e+06	23.5	482.85	NA	NA	NA	NA	NA	0.82	0.05
Empirical	ME	13	b	11.3	8.5	1	210486	6.54161e+06	25	505.2	NA	NA	NA	NA	NA	0.95	0.05
Empirical	ME	15	a	21.4	6.7	1	210493	6.5416e+06	50	877.7	NA	NA	NA	NA	NA	0.62	0.04
Empirical	ME	15	b	21.4	6.7	1	210493	6.5416e+06	31	594.6	NA	NA	NA	NA	NA	0.62	0.05
Empirical	ME	17	a	38.8	8.3	1	210510	6.5416e+06	16.5	378.55	NA	NA	NA	NA	NA	0.73	0.11
Empirical	ME	17	b	38.8	8.3	1	210510	6.5416e+06	21	445.6	NA	NA	NA	NA	NA	0.6	0.04
Empirical	ME	20	a	8.28	7	1	210481	6.54161e+06	25	505.2	NA	NA	NA	NA	NA	0.65	0.05
Empirical	ME	20	b	8.28	7	1	210480	6.54161e+06	21.5	453.05	NA	NA	NA	NA	NA	0.81	0.04
Empirical	ME	21	a	6.33	11.8	1	210476	6.54161e+06	19.5	423.25	NA	NA	NA	NA	45.05	0.64	0.06
Empirical	ME	21	b	6.33	11.8	1	210476	6.54161e+06	21	445.6	NA	NA	NA	NA	44.26	0.49	0.03
Empirical	ME	22	a	12.4	12.6	2	210488	6.54161e+06	36.5	676.55	NA	NA	NA	NA	NA	0.48	0.07
Empirical	ME	22	b	12.4	12.6	2	210489	6.54161e+06	23	475.4	NA	NA	NA	NA	NA	0.73	0.04
Empirical	ME	22	c	12.4	12.6	2	210489	6.54161e+06	13.5	333.85	NA	NA	NA	NA	NA	0.85	0.08
Empirical	ME	22	center	12.4	12.6	2	210489	6.54161e+06	NA	NA	NA	NA	NA	NA	NA	NA	NA
Empirical	ME	22	d	12.4	12.6	2	210489	6.54161e+06	24	490.3	NA	NA	NA	NA	NA	0.8	0.07
Empirical	ME	26	a	32.4	12.2	1	210505	6.54161e+06	19.5	423.25	NA	NA	NA	NA	NA	0.67	0.06
Empirical	ME	26	b	32.4	12.2	1	210505	6.54161e+06	21	445.6	NA	NA	NA	NA	NA	0.61	0.08
Empirical	ME	27	a	42.4	13.09	1	210515	6.54161e+06	16.5	378.55	NA	NA	NA	NA	NA	1.07	0.1
Empirical	ME	27	b	42.4	13.09	1	210515	6.54161e+06	21.5	453.05	NA	NA	NA	NA	NA	0.87	0.05
Empirical	ME	28	a	48.2	12.25	2	210522	6.5416e+06	25.5	512.65	NA	NA	NA	NA	NA	1.18	0.11
Empirical	ME	28	b	48.2	12.25	2	210523	6.5416e+06	16.5	378.55	NA	NA	NA	NA	NA	0.77	0.05
Empirical	ME	28	c	48.2	12.25	2	210523	6.5416e+06	16	371.1	NA	NA	NA	NA	NA	0.85	0.08
Empirical	ME	28	center	48.2	12.25	2	210523	6.5416e+06	NA	NA	NA	NA	NA	NA	NA	NA	NA
Empirical	ME	28	d	48.2	12.25	2	210523	6.5416e+06	12	311.5	NA	NA	NA	NA	NA	0.68	0.09
Empirical	ME	29	a	52.5	12.1	4	210528	6.54161e+06	9	266.8	NA	NA	NA	NA	NA	0.72	0.07
Empirical	ME	29	b	52.5	12.1	4	210528	6.54161e+06	11	296.6	NA	NA	NA	NA	NA	0.99	0.07
Empirical	ME	29	c	52.5	12.1	4	210528	6.54161e+06	18	400.9	NA	NA	NA	NA	NA	1.02	0.05
Empirical	ME	29	center	52.5	12.1	4	210528	6.54161e+06	NA	NA	NA	NA	NA	NA	NA	NA	NA
Empirical	ME	29	d	52.5	12.1	4	210528	6.54161e+06	8	251.9	NA	NA	NA	NA	NA	1	0.11
Empirical	ME	29	e	52.5	12.1	4	210528	6.54161e+06	9	266.8	NA	NA	NA	NA	NA	1.2	0.18
Empirical	ME	29	f	52.5	12.1	4	210529	6.54161e+06	16	371.1	NA	NA	NA	NA	NA	0.95	0.09
Empirical	ME	29	g	52.5	12.1	4	210529	6.54161e+06	14.5	348.75	NA	NA	NA	NA	NA	0.92	0.1
Empirical	ME	29	h	52.5	12.1	4	210529	6.54161e+06	32.5	616.95	NA	NA	NA	NA	NA	0.75	0.09
Empirical	ME	32	a	2.6	18.2	4	210474	6.54162e+06	60	1026.7	NA	NA	NA	NA	NA	0.52	0.03
Empirical	ME	32	b	2.6	18.2	4	210474	6.54162e+06	47	833	NA	NA	NA	NA	NA	0.51	0.03
Empirical	ME	32	c	2.6	18.2	4	210474	6.54162e+06	60	1026.7	NA	NA	NA	NA	NA	0.58	0.04
Empirical	ME	32	center	2.6	18.2	4	210475	6.54162e+06	NA	NA	NA	NA	NA	NA	NA	NA	NA
Empirical	ME	32	d	2.6	18.2	4	210474	6.54162e+06	27.5	542.45	NA	NA	NA	NA	NA	0.76	0.05
Empirical	ME	32	e	2.6	18.2	4	210475	6.54162e+06	42	758.5	NA	NA	NA	NA	NA	1.04	0.13
Empirical	ME	32	f	2.6	18.2	4	210475	6.54162e+06	36.5	676.55	NA	NA	NA	NA	NA	0.73	0.06
Empirical	ME	32	g	2.6	18.2	4	210475	6.54162e+06	37	684	NA	NA	NA	NA	NA	0.56	0.06
Empirical	ME	32	h	2.6	18.2	4	210475	6.54162e+06	52	907.5	NA	NA	NA	NA	NA	0.5	0.03
Empirical	ME	34	a	7.4	16.65	1	210480	6.54161e+06	24	490.3	NA	NA	NA	NA	NA	0.64	0.09
Empirical	ME	34	b	7.4	16.65	1	210480	6.54161e+06	26	520.1	NA	NA	NA	NA	NA	1.22	0.05
Empirical	ME	45	a	7.43	23.5	1	210482	6.54162e+06	28.5	557.35	NA	NA	NA	NA	NA	0.75	0.06
Empirical	ME	45	b	7.43	23.5	1	210482	6.54162e+06	30	579.7	NA	NA	NA	NA	NA	0.66	0.04
Empirical	ME	55	a	7.4	26.1	1	210482	6.54162e+06	24.5	497.75	NA	NA	NA	NA	NA	0.72	0.06
Empirical	ME	55	b	7.4	26.1	1	210482	6.54162e+06	22.5	467.95	NA	NA	NA	NA	NA	0.86	0.05
Empirical	ME	56	a	17.3	26.5	2	210492	6.54162e+06	21.15	447.835	NA	NA	NA	NA	NA	0.77	0.04
Empirical	ME	56	b	17.3	26.5	2	210492	6.54162e+06	35	654.2	NA	NA	NA	NA	NA	0.55	0.04
Empirical	ME	56	c	17.3	26.5	2	210493	6.54163e+06	21	445.6	NA	NA	NA	NA	NA	0.85	0.04
Empirical	ME	56	center	17.3	26.5	2	210493	6.54162e+06	NA	NA	NA	NA	NA	NA	NA	NA	NA
Empirical	ME	56	d	17.3	26.5	2	210493	6.54162e+06	22	460.5	NA	NA	NA	NA	NA	0.57	0.03
Empirical	ME	58	a	37	27.7	1	210512	6.54163e+06	26.5	527.55	NA	NA	NA	NA	NA	0.63	0.1
Empirical	ME	58	b	37	27.7	1	210512	6.54163e+06	21	445.6	NA	NA	NA	NA	NA	0.51	0.05
Empirical	ME	63	a	58.6	29.2	1	210531	6.54162e+06	17.5	393.45	NA	NA	NA	NA	NA	0.86	0.13
Empirical	ME	63	b	58.6	29.2	1	210531	6.54162e+06	25.5	512.65	NA	NA	NA	NA	NA	0.55	0.04
Empirical	ME	66	a	26	31.2	1	210500	6.54163e+06	20	430.7	NA	NA	NA	NA	NA	0.89	0.07
Empirical	ME	66	b	26	31.2	1	210499	6.54163e+06	26	520.1	NA	NA	NA	NA	NA	0.61	0.03
Empirical	ME	69	a	38	34.3	1	210515	6.54163e+06	28.5	557.35	NA	NA	NA	NA	45.46	0.62	0.05
Empirical	ME	69	b	38	34.3	1	210515	6.54163e+06	27	535	NA	NA	NA	NA	44.6	0.62	0.05
Empirical	ME	72	a	41.9	32.95	1	210519	6.54163e+06	17	386	NA	NA	NA	NA	NA	0.76	0.06
Empirical	ME	72	b	41.9	32.95	1	210519	6.54163e+06	33.5	631.85	NA	NA	NA	NA	NA	0.54	0.04
Empirical	ME	78	a	42.75	37.16	2	210521	6.54163e+06	39	713.8	NA	NA	NA	NA	NA	0.67	0.1
Empirical	ME	78	b	42.75	37.16	2	210522	6.54163e+06	27	535	NA	NA	NA	NA	NA	0.42	0.03
Empirical	ME	78	c	42.75	37.16	2	210522	6.54163e+06	55	952.2	NA	NA	NA	NA	NA	0.58	0.04
Empirical	ME	78	center	42.75	37.16	2	210522	6.54163e+06	NA	NA	NA	NA	NA	NA	NA	NA	NA
Empirical	ME	78	d	42.75	37.16	2	210522	6.54163e+06	34	639.3	NA	NA	NA	NA	NA	0.55	0.06
Empirical	ME	79	a	43.7	35.3	1	210525	6.54163e+06	23.5	482.85	NA	NA	NA	NA	NA	0.67	0.06
Empirical	ME	79	b	43.7	35.3	1	210525	6.54163e+06	20.5	438.15	NA	NA	NA	NA	NA	0.61	0.04
Empirical	ME	82	a	58	47.5	1	210541	6.54164e+06	9	266.8	NA	NA	NA	NA	NA	0.69	0.07
Empirical	ME	82	b	58	47.5	1	210541	6.54164e+06	20.5	438.15	NA	NA	NA	NA	NA	0.84	0.04
Empirical	ME	84	a	59.8	35.8	1	210539	6.54163e+06	22	460.5	NA	NA	NA	NA	NA	0.7	0.05
Empirical	ME	84	b	59.8	35.8	1	210539	6.54163e+06	16.5	378.55	NA	NA	NA	NA	NA	0.8	0.09
Empirical	ME	85	a	2.3	42.8	1	210481	6.54164e+06	37	684	NA	NA	NA	NA	NA	0.6	0.04
Empirical	ME	85	b	2.3	42.8	1	210481	6.54164e+06	26	520.1	NA	NA	NA	NA	NA	0.49	0.05
Empirical	ME	86	a	3.1	44	1	210484	6.54164e+06	39	713.8	NA	NA	NA	NA	NA	0.73	0.06
Empirical	ME	86	b	3.1	44	1	210483	6.54164e+06	32	609.5	NA	NA	NA	NA	NA	0.49	0.04
Empirical	ME	87	a	13.4	41.9	1	210500	6.54164e+06	45	803.2	NA	NA	NA	NA	NA	0.63	0.06
Empirical	ME	87	b	13.4	41.9	1	210500	6.54164e+06	42	758.5	NA	NA	NA	NA	NA	0.67	0.07
Empirical	ME	90	a	31.7	37.9	1	210512	6.54163e+06	60	1026.7	NA	NA	NA	NA	NA	0.76	0.07
Empirical	ME	90	b	31.7	37.9	1	210513	6.54164e+06	60	1026.7	NA	NA	NA	NA	NA	0.78	0.04
Empirical	ME	92	a	38.9	41.65	4	210518	6.54165e+06	NA	NA	NA	NA	NA	NA	NA	0.58	0.03
Empirical	ME	92	b	38.9	41.65	4	210518	6.54165e+06	NA	NA	NA	NA	NA	NA	NA	0.74	0.04
Empirical	ME	92	c	38.9	41.65	4	210519	6.54165e+06	NA	NA	NA	NA	NA	NA	NA	0.53	0.06
Empirical	ME	92	d	38.9	41.65	4	210519	6.54165e+06	NA	NA	NA	NA	NA	NA	NA	0.67	0.04
Empirical	ME	92	e	38.9	41.65	4	210519	6.54165e+06	NA	NA	NA	NA	NA	NA	NA	0.69	0.07
Empirical	ME	92	f	38.9	41.65	4	210519	6.54165e+06	NA	NA	NA	NA	NA	NA	NA	0.59	0.03
Empirical	ME	92	g	38.9	41.65	4	210520	6.54165e+06	NA	NA	NA	NA	NA	NA	NA	0.58	0.04
Empirical	ME	92	h	38.9	41.65	4	210520	6.54165e+06	NA	NA	NA	NA	NA	NA	NA	0.38	0.02
Empirical	ME	95	a	1.3	47.6	1	210483	6.54165e+06	37.5	691.45	NA	NA	NA	NA	NA	0.68	0.05
Empirical	ME	95	b	1.3	47.6	1	210482	6.54165e+06	45	803.2	NA	NA	NA	NA	NA	0.45	0.03
Empirical	ME	98	a	28.7	44.3	4	210507	6.54165e+06	37	684	NA	NA	NA	NA	NA	0.69	0.04
Empirical	ME	98	b	28.7	44.3	4	210508	6.54165e+06	33	624.4	NA	NA	NA	NA	NA	1.08	0.05
Empirical	ME	98	c	28.7	44.3	4	210508	6.54164e+06	40	728.7	NA	NA	NA	NA	NA	0.76	0.05
Empirical	ME	98	center	28.7	44.3	4	210508	6.54165e+06	NA	NA	NA	NA	NA	NA	NA	NA	NA
Empirical	ME	98	d	28.7	44.3	4	210508	6.54165e+06	60	1026.7	NA	NA	NA	NA	NA	0.7	0.06
Empirical	ME	98	e	28.7	44.3	4	210508	6.54165e+06	9	266.8	NA	NA	NA	NA	NA	1.89	0.18
Empirical	ME	98	f	28.7	44.3	4	210509	6.54164e+06	14	341.3	NA	NA	NA	NA	NA	0.97	0.04
Empirical	ME	98	g	28.7	44.3	4	210509	6.54164e+06	13.5	333.85	NA	NA	NA	NA	NA	0.84	0.04
Empirical	ME	98	h	28.7	44.3	4	210509	6.54165e+06	28	549.9	NA	NA	NA	NA	NA	0.78	0.04
Empirical	ME	104	a	55.7	48.41	1	210540	6.54164e+06	NA	NA	NA	NA	NA	NA	44.92	0.41	0.04
Empirical	ME	104	b	55.7	48.41	1	210540	6.54165e+06	NA	NA	NA	NA	NA	NA	44.76	0.81	0.04
Empirical	ME	105	a	4.5	52.3	1	210489	6.54165e+06	NA	NA	NA	NA	NA	NA	NA	0.57	0.05
Empirical	ME	105	b	4.5	52.3	1	210489	6.54165e+06	NA	NA	NA	NA	NA	NA	NA	0.58	0.04
Empirical	ME	106	a	16.6	52.7	1	210500	6.54165e+06	17	386	NA	NA	NA	NA	NA	1.03	0.07
Empirical	ME	106	b	16.6	52.7	1	210499	6.54165e+06	13	326.4	NA	NA	NA	NA	NA	0.87	0.04
Empirical	ME	108	a	29.1	51.7	2	210514	6.54165e+06	22	460.5	NA	NA	NA	NA	NA	0.72	0.07
Empirical	ME	108	b	29.1	51.7	2	210514	6.54165e+06	14	341.3	NA	NA	NA	NA	NA	0.71	0.11
Empirical	ME	108	c	29.1	51.7	2	210514	6.54165e+06	18.5	408.35	NA	NA	NA	NA	NA	0.77	0.07
Empirical	ME	108	center	29.1	51.7	2	210514	6.54165e+06	NA	NA	NA	NA	NA	NA	NA	NA	NA
Empirical	ME	108	d	29.1	51.7	2	210515	6.54165e+06	24	490.3	NA	NA	NA	NA	NA	0.66	0.04
Empirical	ME	109	a	26.8	53.3	1	210511	6.54165e+06	28	549.9	NA	NA	NA	NA	NA	0.79	0.08
Empirical	ME	109	b	26.8	53.3	1	210511	6.54165e+06	54	937.3	NA	NA	NA	NA	NA	0.72	0.06
Empirical	ME	110	a	29.2	53.8	1	210514	6.54165e+06	15	356.2	NA	NA	NA	NA	NA	0.79	0.06
Empirical	ME	110	b	29.2	53.8	1	210513	6.54165e+06	20	430.7	NA	NA	NA	NA	NA	0.7	0.03
Empirical	ME	113	a	49.1	53	2	210533	6.54165e+06	58	996.9	NA	NA	NA	NA	NA	0.8	0.04
Empirical	ME	113	b	49.1	53	2	210534	6.54165e+06	56	967.1	NA	NA	NA	NA	NA	0.52	0.05
Empirical	ME	113	c	49.1	53	2	210534	6.54165e+06	18.5	408.35	NA	NA	NA	NA	NA	0.82	0.08
Empirical	ME	113	center	49.1	53	2	210534	6.54165e+06	NA	NA	NA	NA	NA	NA	NA	NA	NA
Empirical	ME	113	d	49.1	53	2	210534	6.54165e+06	13	326.4	NA	NA	NA	NA	NA	0.88	0.05
Empirical	ME	115	a	54.58	54.57	1	210539	6.54165e+06	NA	NA	NA	NA	NA	NA	NA	0.59	0.03
Empirical	ME	115	b	54.58	54.57	1	210539	6.54165e+06	NA	NA	NA	NA	NA	NA	NA	NA	NA
Empirical	ME	116	a	2.1	56.5	1	210491	6.54166e+06	60	1026.7	NA	NA	NA	NA	NA	0.67	0.07
Empirical	ME	116	b	2.1	56.5	1	210491	6.54166e+06	48	847.9	NA	NA	NA	NA	NA	0.55	0.04
Empirical	ME	121	a	28.2	56.6	1	210513	6.54165e+06	55	952.2	NA	NA	NA	NA	NA	0.6	0.04
Empirical	ME	121	b	28.2	56.6	1	210513	6.54165e+06	43	773.4	NA	NA	NA	NA	NA	0.59	0.03
Empirical	ME	123	a	36.5	58	4	210521	6.54165e+06	20	430.7	NA	NA	NA	NA	NA	NA	NA
Empirical	ME	123	b	36.5	58	4	210521	6.54165e+06	38.5	706.35	NA	NA	NA	NA	NA	0.74	0.08
Empirical	ME	123	c	36.5	58	4	210521	6.54165e+06	60	1026.7	NA	NA	NA	NA	NA	1.03	0.05
Empirical	ME	123	d	36.5	58	4	210521	6.54165e+06	40	728.7	NA	NA	NA	NA	NA	0.82	0.05
Empirical	ME	123	e	36.5	58	4	210522	6.54165e+06	40	728.7	NA	NA	NA	NA	NA	0.57	0.05
Empirical	ME	123	f	36.5	58	4	210522	6.54165e+06	55	952.2	NA	NA	NA	NA	NA	0.7	0.04
Empirical	ME	123	g	36.5	58	4	210522	6.54165e+06	55	952.2	NA	NA	NA	NA	NA	0.61	0.04
Empirical	ME	123	h	36.5	58	4	210522	6.54165e+06	24.5	497.75	NA	NA	NA	NA	NA	0.81	0.05
Empirical	ME	127	a	17.3	26.5	2	210492	6.54163e+06	21.15	447.835	NA	NA	NA	NA	NA	NA	NA
Empirical	ME	127	b	17.3	26.5	2	210492	6.54163e+06	35	654.2	NA	NA	NA	NA	NA	NA	NA
Empirical	ME	127	c	17.3	26.5	2	210493	6.54163e+06	21	445.6	NA	NA	NA	NA	NA	NA	NA
Empirical	ME	127	d	17.3	26.5	2	210493	6.54163e+06	22	460.5	NA	NA	NA	NA	NA	NA	NA
Empirical	MF	1	a	4	1	1	210403	6.54162e+06	17	386	NA	NA	NA	NA	43.01	0.484224	0.05
Empirical	MF	1	b	4	1	1	210403	6.54162e+06	17	386	NA	NA	NA	NA	43.03	0.52106	0.03
Empirical	MF	3	a	11.4	1.7	1	210411	6.54162e+06	21	445.6	NA	NA	NA	NA	NA	NA	NA
Empirical	MF	3	b	11.4	1.7	1	210411	6.54162e+06	16	371.1	NA	NA	NA	NA	NA	0.5146	0.03
Empirical	MF	6	a	27.29	13.05	1	210429	6.54163e+06	55	952.2	NA	NA	NA	NA	NA	0.781608	0.04
Empirical	MF	6	b	27.29	13.05	1	210429	6.54163e+06	20	430.7	NA	NA	NA	NA	NA	NA	NA
Empirical	MF	12	a	58.45	3.82	2	210458	6.54162e+06	24	490.3	NA	NA	NA	NA	NA	0.494233	0.03
Empirical	MF	12	b	58.45	3.82	2	210458	6.54162e+06	22.5	467.95	NA	NA	NA	NA	NA	0.582953	0.05
Empirical	MF	12	c	58.45	3.82	2	210458	6.54162e+06	20	430.7	NA	NA	NA	NA	NA	0.565548	0.05
Empirical	MF	12	center	58.45	3.82	2	210458	6.54162e+06	NA	NA	NA	NA	NA	NA	NA	NA	NA
Empirical	MF	12	d	58.45	3.82	2	210459	6.54162e+06	27.5	542.45	NA	NA	NA	NA	NA	0.457422	0.03
Empirical	MF	13	a	8.65	13.2	1	210409	6.54163e+06	20.5	438.15	NA	NA	NA	NA	NA	0.744683	0.03
Empirical	MF	13	b	8.65	13.2	1	210410	6.54163e+06	18	400.9	NA	NA	NA	NA	NA	0.511017	0.05
Empirical	MF	15	a	21.72	8.3	1	210420	6.54162e+06	15	356.2	NA	NA	NA	NA	NA	0.486651	0.03
Empirical	MF	15	b	21.72	8.3	1	210420	6.54162e+06	16	371.1	NA	NA	NA	NA	NA	0.570245	0.03
Empirical	MF	16	a	8.05	31.61	1	210412	6.54165e+06	23.5	482.85	NA	NA	NA	NA	NA	0.703842	0.04
Empirical	MF	16	b	8.05	31.61	1	210412	6.54165e+06	21	445.6	NA	NA	NA	NA	NA	0.696074	0.08
Empirical	MF	18	a	7.2	46.4	1	210416	6.54166e+06	39	713.8	NA	NA	NA	NA	NA	0.652973	0.03
Empirical	MF	18	b	7.2	46.4	1	210416	6.54166e+06	43	773.4	NA	NA	NA	NA	NA	0.432494	0.03
Empirical	MF	20	a	13.39	7.63	1	210414	6.54162e+06	14	341.3	NA	NA	NA	NA	NA	0.506746	0.05
Empirical	MF	20	b	13.39	7.63	1	210415	6.54162e+06	17	386	NA	NA	NA	NA	NA	0.568506	0.06
Empirical	MF	21	a	10.35	5.7	1	210411	6.54162e+06	14	341.3	NA	NA	NA	NA	NA	0.605403	0.04
Empirical	MF	21	b	10.35	5.7	1	210411	6.54162e+06	10	281.7	NA	NA	NA	NA	NA	0.620622	0.03
Empirical	MF	29	a	11.7	47.3	4	210421	6.54166e+06	43	773.4	NA	NA	NA	NA	NA	0.531421	0.03
Empirical	MF	29	a	11.7	47.3	4	210421	6.54166e+06	43	773.4	NA	NA	NA	NA	NA	NA	NA
Empirical	MF	29	b	11.7	47.3	4	210422	6.54166e+06	26	520.1	NA	NA	NA	NA	NA	NA	NA
Empirical	MF	29	b	11.7	47.3	4	210422	6.54166e+06	26	520.1	NA	NA	NA	NA	NA	NA	NA
Empirical	MF	29	c	11.7	47.3	4	210422	6.54166e+06	24	490.3	NA	NA	NA	NA	NA	0.715066	0.07
Empirical	MF	29	c	11.7	47.3	4	210422	6.54166e+06	24	490.3	NA	NA	NA	NA	NA	NA	NA
Empirical	MF	29	d	11.7	47.3	4	210422	6.54166e+06	28	549.9	NA	NA	NA	NA	NA	0.575421	0.03
Empirical	MF	29	d	11.7	47.3	4	210422	6.54166e+06	28	549.9	NA	NA	NA	NA	NA	NA	NA
Empirical	MF	29	e	11.7	47.3	4	210422	6.54166e+06	28.5	557.35	NA	NA	NA	NA	NA	0.5489	0.03
Empirical	MF	29	e	11.7	47.3	4	210422	6.54166e+06	28.5	557.35	NA	NA	NA	NA	NA	NA	NA
Empirical	MF	29	f	11.7	47.3	4	210423	6.54166e+06	26	520.1	NA	NA	NA	NA	NA	0.52183	0.03
Empirical	MF	29	f	11.7	47.3	4	210423	6.54166e+06	26	520.1	NA	NA	NA	NA	NA	NA	NA
Empirical	MF	29	g	11.7	47.3	4	210423	6.54166e+06	45	803.2	NA	NA	NA	NA	NA	0.380957	0.03
Empirical	MF	29	g	11.7	47.3	4	210423	6.54166e+06	45	803.2	NA	NA	NA	NA	NA	NA	NA
Empirical	MF	29	h	11.7	47.3	4	210423	6.54166e+06	31	594.6	NA	NA	NA	NA	NA	0.588673	0.04
Empirical	MF	29	h	11.7	47.3	4	210423	6.54166e+06	31	594.6	NA	NA	NA	NA	NA	NA	NA
Empirical	MF	32	a	17.9	2	4	210417	6.54162e+06	10	281.7	NA	NA	NA	NA	NA	0.452263	0.03
Empirical	MF	32	b	17.9	2	4	210417	6.54162e+06	14	341.3	NA	NA	NA	NA	NA	0.56673	0.04
Empirical	MF	32	c	17.9	2	4	210417	6.54161e+06	17.5	393.45	NA	NA	NA	NA	NA	0.531197	0.05
Empirical	MF	32	d	17.9	2	4	210418	6.54162e+06	20	430.7	NA	NA	NA	NA	NA	0.568193	0.03
Empirical	MF	32	e	17.9	2	4	210418	6.54162e+06	13.5	333.85	NA	NA	NA	NA	NA	0.796482	0.04
Empirical	MF	32	f	17.9	2	4	210418	6.54161e+06	7	237	NA	NA	NA	NA	NA	0.545086	0.03
Empirical	MF	32	g	17.9	2	4	210418	6.54161e+06	17.5	393.45	NA	NA	NA	NA	NA	0.484283	0.05
Empirical	MF	32	h	17.9	2	4	210419	6.54162e+06	18.5	408.35	NA	NA	NA	NA	NA	0.619366	0.04
Empirical	MF	34	a	18.85	8.6	1	210417	6.54163e+06	12.5	318.95	NA	NA	NA	NA	NA	0.627775	0.04
Empirical	MF	34	b	18.85	8.6	1	210418	6.54162e+06	14	341.3	NA	NA	NA	NA	NA	0.627563	0.07
Empirical	MF	37	a	17.47	22.25	2	210418	6.54164e+06	20	430.7	NA	NA	NA	NA	NA	0.599049	0.03
Empirical	MF	37	b	17.47	22.25	2	210419	6.54164e+06	15.5	363.65	NA	NA	NA	NA	NA	0.414916	0.04
Empirical	MF	37	c	17.47	22.25	2	210419	6.54164e+06	17.5	393.45	NA	NA	NA	NA	NA	0.479955	0.03
Empirical	MF	37	d	17.47	22.25	2	210419	6.54164e+06	13.5	333.85	NA	NA	NA	NA	NA	0.620803	0.03
Empirical	MF	38	a	16.1	25.55	2	210417	6.54164e+06	20	430.7	NA	NA	NA	NA	NA	0.545013	0.04
Empirical	MF	38	b	16.1	25.55	2	210417	6.54164e+06	13	326.4	NA	NA	NA	NA	NA	0.571416	0.03
Empirical	MF	38	c	16.1	25.55	2	210417	6.54164e+06	20	430.7	NA	NA	NA	NA	NA	0.440058	0.03
Empirical	MF	38	d	16.1	25.55	2	210417	6.54164e+06	19	415.8	NA	NA	NA	NA	NA	0.572487	0.03
Empirical	MF	42	a	16.62	53.9	1	210431	6.54167e+06	22	460.5	NA	NA	NA	NA	NA	0.933069	0.04
Empirical	MF	42	b	16.62	53.9	1	210431	6.54167e+06	25.5	512.65	NA	NA	NA	NA	NA	NA	NA
Empirical	MF	49	a	24.2	15.86	1	210425	6.54163e+06	10	281.7	NA	NA	NA	NA	NA	0.592671	0.03
Empirical	MF	49	b	24.2	15.86	1	210425	6.54163e+06	9	266.8	NA	NA	NA	NA	NA	0.679125	0.04
Empirical	MF	52	a	23.25	37.85	2	210437	6.54165e+06	11	296.6	NA	NA	NA	NA	44.15	0.484206	0.05
Empirical	MF	52	b	23.25	37.85	2	210437	6.54165e+06	12	311.5	NA	NA	NA	NA	43.14	0.654916	0.04
Empirical	MF	52	c	23.25	37.85	2	210438	6.54165e+06	18	400.9	NA	NA	NA	NA	43.08	0.499029	0.03
Empirical	MF	52	d	23.25	37.85	2	210438	6.54165e+06	20	430.7	NA	NA	NA	NA	42.3	0.613403	0.03
Empirical	MF	54	a	27.1	3.9	1	210427	6.54162e+06	7	237	NA	NA	NA	NA	NA	0.609858	0.03
Empirical	MF	54	b	27.1	3.9	1	210427	6.54162e+06	11.5	304.05	NA	NA	NA	NA	NA	0.559699	0.03
Empirical	MF	56	a	27	6.9	2	210430	6.54163e+06	17	386	NA	NA	NA	NA	NA	0.478132	0.03
Empirical	MF	56	b	27	6.9	2	210430	6.54163e+06	14.5	348.75	NA	NA	NA	NA	NA	0.645769	0.04
Empirical	MF	56	c	27	6.9	2	210430	6.54163e+06	42	758.5	NA	NA	NA	NA	NA	0.455457	0.02
Empirical	MF	56	d	27	6.9	2	210430	6.54163e+06	15.5	363.65	NA	NA	NA	NA	NA	0.597581	0.06
Empirical	MF	61	a	28.5	51.55	1	210444	6.54166e+06	13	326.4	NA	NA	NA	NA	NA	0.545377	0.03
Empirical	MF	61	b	28.5	51.55	1	210443	6.54166e+06	26.5	527.55	NA	NA	NA	NA	NA	0.536092	0.05
Empirical	MF	62	a	25.9	57.95	1	210441	6.54167e+06	38	698.9	NA	NA	NA	NA	NA	0.470431	0.04
Empirical	MF	62	b	25.9	57.95	1	210442	6.54167e+06	20	430.7	NA	NA	NA	NA	NA	NA	NA
Empirical	MF	69	a	30.8	43.24	1	210444	6.54166e+06	55	952.2	NA	NA	NA	NA	NA	0.444834	0.05
Empirical	MF	69	b	30.8	43.24	1	210445	6.54166e+06	58	996.9	NA	NA	NA	NA	NA	0.535743	0.03
Empirical	MF	70	a	30.75	41.24	1	210443	6.54165e+06	32.5	616.95	NA	NA	NA	NA	43.31	0.578421	0.03
Empirical	MF	70	b	30.75	41.24	1	210443	6.54165e+06	39.5	721.25	NA	NA	NA	NA	44.7	0.541777	0.03
Empirical	MF	74	a	38.34	9.35	2	210438	6.54162e+06	11	296.6	NA	NA	NA	NA	NA	0.545301	0.05
Empirical	MF	74	b	38.34	9.35	2	210438	6.54162e+06	36	669.1	NA	NA	NA	NA	NA	0.646422	0.05
Empirical	MF	74	c	38.34	9.35	2	210438	6.54162e+06	30	579.7	NA	NA	NA	NA	NA	0.506683	0.05
Empirical	MF	74	center	38.34	9.35	2	210438	6.54162e+06	NA	NA	NA	NA	NA	NA	NA	NA	NA
Empirical	MF	74	d	38.34	9.35	2	210439	6.54162e+06	23	475.4	NA	NA	NA	NA	NA	0.552343	0.05
Empirical	MF	80	a	36.55	45.5	1	210448	6.54165e+06	16	371.1	NA	NA	NA	NA	NA	0.450818	0.03
Empirical	MF	80	b	36.55	45.5	1	210448	6.54165e+06	13.5	333.85	NA	NA	NA	NA	NA	0.578962	0.03
Empirical	MF	81	a	40	47	1	210455	6.54166e+06	NA	NA	NA	NA	NA	NA	NA	0.38168	0.04
Empirical	MF	81	b	40	47	1	210455	6.54166e+06	NA	NA	NA	NA	NA	NA	NA	0.592125	0.03
Empirical	MF	82	a	38.3	50.51	1	210451	6.54166e+06	13	326.4	NA	NA	NA	NA	NA	0.695127	0.04
Empirical	MF	82	b	38.3	50.51	1	210452	6.54166e+06	22	460.5	NA	NA	NA	NA	NA	0.411892	0.02
Empirical	MF	85	a	42.3	0.72	1	210442	6.54161e+06	NA	NA	NA	NA	NA	NA	NA	NA	NA
Empirical	MF	85	b	42.3	0.72	1	210443	6.54161e+06	NA	NA	NA	NA	NA	NA	NA	0.321304	0.02
Empirical	MF	88	a	42	17.5	1	210444	6.54163e+06	19	415.8	NA	NA	NA	NA	NA	0.431121	0.02
Empirical	MF	88	b	42	17.5	1	210444	6.54163e+06	13	326.4	NA	NA	NA	NA	NA	NA	NA
Empirical	MF	89	a	40.75	29.2	1	210450	6.54165e+06	23	475.4	NA	NA	NA	NA	NA	0.544314	0.03
Empirical	MF	89	b	40.75	29.2	1	210450	6.54165e+06	15	356.2	NA	NA	NA	NA	NA	0.533095	0.03
Empirical	MF	90	a	43.3	33.85	1	210447	6.54165e+06	45	803.2	NA	NA	NA	NA	NA	0.496399	0.04
Empirical	MF	90	b	43.3	33.85	1	210446	6.54165e+06	36	669.1	NA	NA	NA	NA	NA	0.840034	0.05
Empirical	MF	92	a	41.65	38.9	2	210454	6.54165e+06	20	430.7	NA	NA	NA	NA	NA	0.447276	0.02
Empirical	MF	92	b	41.65	38.9	2	210455	6.54165e+06	21.5	453.05	NA	NA	NA	NA	NA	0.503986	0.03
Empirical	MF	92	c	41.65	38.9	2	210455	6.54165e+06	23.5	482.85	NA	NA	NA	NA	NA	0.910393	0.03
Empirical	MF	92	center	41.65	38.9	2	210455	6.54165e+06	NA	NA	NA	NA	NA	NA	NA	NA	NA
Empirical	MF	92	d	41.65	38.9	2	210455	6.54165e+06	23	475.4	NA	NA	NA	NA	NA	0.466617	0.03
Empirical	MF	93	a	43.2	53.25	2	210462	6.54166e+06	22.5	467.95	NA	NA	NA	NA	NA	0.55179	0.03
Empirical	MF	93	b	43.2	53.25	2	210462	6.54166e+06	34	639.3	NA	NA	NA	NA	NA	0.517722	0.05
Empirical	MF	93	c	43.2	53.25	2	210462	6.54166e+06	14	341.3	NA	NA	NA	NA	NA	0.739897	0.04
Empirical	MF	93	center	43.2	53.25	2	210462	6.54166e+06	NA	NA	NA	NA	NA	NA	NA	NA	NA
Empirical	MF	93	d	43.2	53.25	2	210463	6.54166e+06	28	549.9	NA	NA	NA	NA	NA	0.599219	0.03
Empirical	MF	94	a	43	57.2	1	210460	6.54167e+06	16	371.1	NA	NA	NA	NA	NA	NA	NA
Empirical	MF	94	b	43	57.2	1	210460	6.54167e+06	28	549.9	NA	NA	NA	NA	NA	0.501446	0.03
Empirical	MF	98	a	46.65	27.67	4	210452	6.54164e+06	20.5	438.15	NA	NA	NA	NA	NA	0.446862	0.03
Empirical	MF	98	b	46.65	27.67	4	210452	6.54164e+06	23	475.4	NA	NA	NA	NA	NA	0.503318	0.03
Empirical	MF	98	c	46.65	27.67	4	210452	6.54164e+06	19.5	423.25	NA	NA	NA	NA	NA	0.664647	0.05
Empirical	MF	98	center	46.65	27.67	4	210452	6.54164e+06	NA	NA	NA	NA	NA	NA	NA	NA	NA
Empirical	MF	98	d	46.65	27.67	4	210452	6.54164e+06	37.5	691.45	NA	NA	NA	NA	NA	0.78615	0.04
Empirical	MF	98	e	46.65	27.67	4	210452	6.54164e+06	16	371.1	NA	NA	NA	NA	NA	0.542093	0.03
Empirical	MF	98	f	46.65	27.67	4	210453	6.54164e+06	21	445.6	NA	NA	NA	NA	NA	0.578004	0.04
Empirical	MF	98	g	46.65	27.67	4	210453	6.54164e+06	11	296.6	NA	NA	NA	NA	NA	0.578148	0.06
Empirical	MF	98	h	46.65	27.67	4	210453	6.54164e+06	17.5	393.45	NA	NA	NA	NA	NA	0.650118	0.04
Empirical	MF	99	a	46.1	32.05	1	210449	6.54165e+06	29	564.8	NA	NA	NA	NA	NA	0.436283	0.03
Empirical	MF	99	b	46.1	32.05	1	210448	6.54164e+06	20.5	438.15	NA	NA	NA	NA	NA	0.566452	0.06
Empirical	MF	103	a	47.88	58.75	1	210462	6.54167e+06	22	460.5	NA	NA	NA	NA	NA	0.60794	0.06
Empirical	MF	103	b	47.88	58.75	1	210462	6.54167e+06	30.5	587.15	NA	NA	NA	NA	NA	0.626179	0.03
Empirical	MF	109	a	54.15	26.1	1	210456	6.54164e+06	20	430.7	NA	NA	NA	NA	NA	0.468512	0.03
Empirical	MF	109	b	54.15	26.1	1	210456	6.54164e+06	13	326.4	NA	NA	NA	NA	NA	0.646188	0.03
Empirical	MF	115	a	54.58	54.57	1	210473	6.54166e+06	42	758.5	NA	NA	NA	NA	NA	NA	NA
Empirical	MF	115	b	54.58	54.57	1	210473	6.54166e+06	48	847.9	NA	NA	NA	NA	NA	0.554597	0.03
Empirical	MF	116	a	59.7	1	1	210459	6.54161e+06	21	445.6	NA	NA	NA	NA	NA	0.466481	0.03
Empirical	MF	116	b	59.7	1	1	210459	6.54161e+06	16.5	378.55	NA	NA	NA	NA	NA	0.564416	0.03
Empirical	MF	123	a	55.56	31.35	4	210460	6.54165e+06	27	535	NA	NA	NA	NA	NA	0.747002	0.04
Empirical	MF	123	b	55.56	31.35	4	210460	6.54165e+06	31	594.6	NA	NA	NA	NA	NA	0.53183	0.05
Empirical	MF	123	c	55.56	31.35	4	210460	6.54165e+06	22	460.5	NA	NA	NA	NA	NA	0.600718	0.03
Empirical	MF	123	center	55.56	31.35	4	210461	6.54165e+06	NA	NA	NA	NA	NA	NA	NA	NA	NA
Empirical	MF	123	d	55.56	31.35	4	210461	6.54165e+06	18	400.9	NA	NA	NA	NA	NA	0.674737	0.04
Empirical	MF	123	e	55.56	31.35	4	210461	6.54165e+06	20.5	438.15	NA	NA	NA	NA	NA	0.977129	0.03
Empirical	MF	123	f	55.56	31.35	4	210461	6.54165e+06	22	460.5	NA	NA	NA	NA	NA	0.52253	0.05
Empirical	MF	123	g	55.56	31.35	4	210461	6.54165e+06	22	460.5	NA	NA	NA	NA	NA	0.765912	0.05
Empirical	MF	123	h	55.56	31.35	4	210462	6.54165e+06	33	624.4	NA	NA	NA	NA	NA	0.483726	0.03
Empirical	MF	125	a	56.25	46.6	1	210466	6.54166e+06	42.5	765.95	NA	NA	NA	NA	NA	NA	NA
Empirical	MF	125	b	56.25	46.6	1	210465	6.54166e+06	42	758.5	NA	NA	NA	NA	NA	0.860828	0.03
Empirical	MF	126	a	55.5	55.5	1	210470	6.54166e+06	30.5	587.15	NA	NA	NA	NA	43.68	0.565302	0.06
Empirical	MF	126	b	55.5	55.5	1	210470	6.54166e+06	29.5	572.25	NA	NA	NA	NA	43.02	0.874702	0.05
Simulated

## Sheet: Simulated data
DataType	Plot	Plot_x	Plot_y	UTM_x	UTM_y	Biomass
Simulated	MA	1	1	210461	6541521	766.971
Simulated	MA	2	1	210462	6541521	775.713
Simulated	MA	0	0	210463	6541521	404.683
Simulated	MA	4	1	210464	6541521	880.495
Simulated	MA	5	1	210465	6541521	808.037
Simulated	MA	0	0	210466	6541521	406.236
Simulated	MA	7	1	210467	6541521	837.429
Simulated	MA	8	1	210468	6541521	891.51
Simulated	MA	0	0	210469	6541521	408.648
Simulated	MA	0	0	210470	6541521	442.486
Simulated	MA	11	1	210471	6541521	860.928
Simulated	MA	12	1	210472	6541521	914.555
Simulated	MA	0	0	210473	6541521	433.439
Simulated	MA	0	0	210474	6541521	430.225
Simulated	MA	0	0	210475	6541521	397.977
Simulated	MA	16	1	210476	6541521	821.037
Simulated	MA	17	1	210477	6541521	834.941
Simulated	MA	0	0	210478	6541521	404.041
Simulated	MA	0	0	210479	6541521	402.867
Simulated	MA	0	0	210480	6541521	432.21
Simulated	MA	0	0	210481	6541521	390.273
Simulated	MA	0	0	210482	6541521	407.053
Simulated	MA	0	0	210483	6541521	407.784
Simulated	MA	0	0	210484	6541521	444.681
Simulated	MA	0	0	210485	6541521	400.355
Simulated	MA	0	0	210486	6541521	371.822
Simulated	MA	27	1	210487	6541521	842.009
Simulated	MA	28	1	210488	6541521	784.186
Simulated	MA	0	0	210489	6541521	418.905
Simulated	MA	0	0	210490	6541521	422.412
Simulated	MA	0	0	210491	6541521	427.413
Simulated	MA	0	0	210492	6541521	379.273
Simulated	MA	0	0	210493	6541521	364.625
Simulated	MA	0	0	210494	6541521	409.347
Simulated	MA	0	0	210495	6541521	402.648
Simulated	MA	36	1	210496	6541521	793.335
Simulated	MA	37	1	210497	6541521	801.696
Simulated	MA	0	0	210498	6541521	401.969
Simulated	MA	0	0	210499	6541521	425.063
Simulated	MA	40	1	210500	6541521	836.196
Simulated	MA	41	1	210501	6541521	842.755
Simulated	MA	42	1	210502	6541521	808.841
Simulated	MA	0	0	210503	6541521	432.226
Simulated	MA	0	0	210504	6541521	435.783
Simulated	MA	0	0	210505	6541521	443.591
Simulated	MA	0	0	210506	6541521	388.506
Simulated	MA	0	0	210507	6541521	391.261
Simulated	MA	0	0	210508	6541521	394.635
Simulated	MA	0	0	210509	6541521	406.307
Simulated	MA	0	0	210510	6541521	407.596
Simulated	MA	0	0	210511	6541521	412.215
Simulated	MA	0	0	210512	6541521	425.458
Simulated	MA	0	0	210513	6541521	427.763
Simulated	MA	0	0	210514	6541521	396.112
Simulated	MA	0	0	210515	6541521	405.999
Simulated	MA	0	0	210516	6541521	400.117
Simulated	MA	0	0	210517	6541521	384.207
Simulated	MA	0	0	210518	6541521	431.211
Simulated	MA	0	0	210519	6541521	400.309
Simulated	MA	0	0	210520	6541521	418.211
Simulated	MA	1	2	210461	6541522	831.989
Simulated	MA	2	2	210462	6541522	818.93
Simulated	MA	0	0	210463	6541522	400.776
Simulated	MA	4	2	210464	6541522	771.115
Simulated	MA	5	2	210465	6541522	772.708
Simulated	MA	0	0	210466	6541522	437.865
Simulated	MA	7	2	210467	6541522	806.169
Simulated	MA	8	2	210468	6541522	815.782
Simulated	MA	0	0	210469	6541522	400.391
Simulated	MA	0	0	210470	6541522	423.696
Simulated	MA	11	2	210471	6541522	862.341
Simulated	MA	12	2	210472	6541522	795.09
Simulated	MA	0	0	210473	6541522	435.861
Simulated	MA	0	0	210474	6541522	406.335
Simulated	MA	0	0	210475	6541522	397.942
Simulated	MA	16	2	210476	6541522	830.177
Simulated	MA	17	2	210477	6541522	853.492
Simulated	MA	0	0	210478	6541522	399.509
Simulated	MA	0	0	210479	6541522	402.674
Simulated	MA	0	0	210480	6541522	416.987
Simulated	MA	0	0	210481	6541522	414.61
Simulated	MA	0	0	210482	6541522	400.069
Simulated	MA	0	0	210483	6541522	413.29
Simulated	MA	0	0	210484	6541522	421.101
Simulated	MA	0	0	210485	6541522	413.838
Simulated	MA	0	0	210486	6541522	380.843
Simulated	MA	27	2	210487	6541522	801.006
Simulated	MA	28	2	210488	6541522	783.295
Simulated	MA	0	0	210489	6541522	414.109
Simulated	MA	30	2	210490	6541522	850.996
Simulated	MA	31	2	210491	6541522	805.29
Simulated	MA	32	2	210492	6541522	795.287
Simulated	MA	0	0	210493	6541522	423.037
Simulated	MA	0	0	210494	6541522	373.458
Simulated	MA	0	0	210495	6541522	355.596
Simulated	MA	36	2	210496	6541522	787.283
Simulated	MA	37	2	210497	6541522	778.226
Simulated	MA	0	0	210498	6541522	399.912
Simulated	MA	0	0	210499	6541522	380.267
Simulated	MA	40	2	210500	6541522	788.125
Simulated	MA	41	2	210501	6541522	867.638
Simulated	MA	42	2	210502	6541522	839.777
Simulated	MA	0	0	210503	6541522	428.154
Simulated	MA	0	0	210504	6541522	440.753
Simulated	MA	0	0	210505	6541522	416.669
Simulated	MA	0	0	210506	6541522	425.893
Simulated	MA	0	0	210507	6541522	414.862
Simulated	MA	0	0	210508	6541522	398.63
Simulated	MA	0	0	210509	6541522	422.924
Simulated	MA	0	0	210510	6541522	378.233
Simulated	MA	51	2	210511	6541522	880.892
Simulated	MA	52	2	210512	6541522	774.001
Simulated	MA	0	0	210513	6541522	418.41
Simulated	MA	0	0	210514	6541522	409.607
Simulated	MA	0	0	210515	6541522	420.726
Simulated	MA	0	0	210516	6541522	378.555
Simulated	MA	0	0	210517	6541522	426.712
Simulated	MA	0	0	210518	6541522	396.849
Simulated	MA	0	0	210519	6541522	378.633
Simulated	MA	0	0	210520	6541522	379.36
Simulated	MA	0	0	210461	6541523	437.114
Simulated	MA	0	0	210462	6541523	407.036
Simulated	MA	0	0	210463	6541523	405.405
Simulated	MA	0	0	210464	6541523	375.805
Simulated	MA	0	0	210465	6541523	354.781
Simulated	MA	0	0	210466	6541523	407.679
Simulated	MA	0	0	210467	6541523	386.316
Simulated	MA	0	0	210468	6541523	402.138
Simulated	MA	0	0	210469	6541523	424.504
Simulated	MA	0	0	210470	6541523	446.242
Simulated	MA	0	0	210471	6541523	445.299
Simulated	MA	0	0	210472	6541523	454.277
Simulated	MA	0	0	210473	6541523	425.931
Simulated	MA	0	0	210474	6541523	409.447
Simulated	MA	0	0	210475	6541523	409.737
Simulated	MA	0	0	210476	6541523	431.429
Simulated	MA	0	0	210477	6541523	399.927
Simulated	MA	0	0	210478	6541523	414.408
Simulated	MA	0	0	210479	6541523	397.695
Simulated	MA	0	0	210480	6541523	439.421
Simulated	MA	0	0	210481	6541523	417.388
Simulated	MA	0	0	210482	6541523	386.161
Simulated	MA	0	0	210483	6541523	403.495
Simulated	MA	0	0	210484	6541523	429.11
Simulated	MA	0	0	210485	6541523	412.666
Simulated	MA	0	0	210486	6541523	380.171
Simulated	MA	0	0	210487	6541523	392.248
Simulated	MA	0	0	210488	6541523	420.283
Simulated	MA	0	0	210489	6541523	401.951
Simulated	MA	30	3	210490	6541523	828.951
Simulated	MA	31	3	210491	6541523	830.493
Simulated	MA	32	3	210492	6541523	801.314
Simulated	MA	0	0	210493	6541523	385.991
Simulated	MA	0	0	210494	6541523	425.475
Simulated	MA	0	0	210495	6541523	393.55
Simulated	MA	0	0	210496	6541523	413.168
Simulated	MA	0	0	210497	6541523	433.939
Simulated	MA	0	0	210498	6541523	398.807
Simulated	MA	0	0	210499	6541523	390.403
Simulated	MA	40	3	210500	6541523	840.639
Simulated	MA	41	3	210501	6541523	790.05
Simulated	MA	42	3	210502	6541523	800.246
Simulated	MA	0	0	210503	6541523	410.637
Simulated	MA	0	0	210504	6541523	397.784
Simulated	MA	0	0	210505	6541523	420.736
Simulated	MA	0	0	210506	6541523	410.018
Simulated	MA	0	0	210507	6541523	403.139
Simulated	MA	0	0	210508	6541523	418.668
Simulated	MA	0	0	210509	6541523	411.096
Simulated	MA	0	0	210510	6541523	414.304
Simulated	MA	51	3	210511	6541523	825.497
Simulated	MA	52	3	210512	6541523	792.773
Simulated	MA	0	0	210513	6541523	416.77
Simulated	MA	0	0	210514	6541523	399.113
Simulated	MA	55	3	210515	6541523	826.228
Simulated	MA	56	3	210516	6541523	744.398
Simulated	MA	57	3	210517	6541523	837.06
Simulated	MA	58	3	210518	6541523	818.429
Simulated	MA	59	3	210519	6541523	781.662
Simulated	MA	0	0	210520	6541523	435.455
Simulated	MA	0	0	210461	6541524	411.81
Simulated	MA	0	0	210462	6541524	396.179
Simulated	MA	0	0	210463	6541524	402.164
Simulated	MA	0	0	210464	6541524	411.849
Simulated	MA	0	0	210465	6541524	410.829
Simulated	MA	6	4	210466	6541524	789.669
Simulated	MA	7	4	210467	6541524	788.619
Simulated	MA	0	0	210468	6541524	376.098
Simulated	MA	0	0	210469	6541524	410.139
Simulated	MA	0	0	210470	6541524	417.658
Simulated	MA	0	0	210471	6541524	417.29
Simulated	MA	0	0	210472	6541524	412.672
Simulated	MA	0	0	210473	6541524	428.834
Simulated	MA	0	0	210474	6541524	412.792
Simulated	MA	0	0	210475	6541524	454.834
Simulated	MA	0	0	210476	6541524	440.207
Simulated	MA	0	0	210477	6541524	392.481
Simulated	MA	0	0	210478	6541524	399.54
Simulated	MA	0	0	210479	6541524	430.335
Simulated	MA	20	4	210480	6541524	780.487
Simulated	MA	21	4	210481	6541524	775.301
Simulated	MA	0	0	210482	6541524	380.376
Simulated	MA	23	4	210483	6541524	823.535
Simulated	MA	24	4	210484	6541524	809.754
Simulated	MA	0	0	210485	6541524	393.821
Simulated	MA	0	0	210486	6541524	416.908
Simulated	MA	0	0	210487	6541524	405.316
Simulated	MA	0	0	210488	6541524	406.454
Simulated	MA	0	0	210489	6541524	385.152
Simulated	MA	30	4	210490	6541524	763.496
Simulated	MA	31	4	210491	6541524	917.369
Simulated	MA	32	4	210492	6541524	808.892
Simulated	MA	0	0	210493	6541524	413.734
Simulated	MA	0	0	210494	6541524	404.358
Simulated	MA	0	0	210495	6541524	413.207
Simulated	MA	0	0	210496	6541524	407.572
Simulated	MA	0	0	210497	6541524	435.036
Simulated	MA	0	0	210498	6541524	416.95
Simulated	MA	0	0	210499	6541524	381.781
Simulated	MA	0	0	210500	6541524	395.328
Simulated	MA	0	0	210501	6541524	394.204
Simulated	MA	0	0	210502	6541524	408.468
Simulated	MA	0	0	210503	6541524	434.842
Simulated	MA	0	0	210504	6541524	414.824
Simulated	MA	45	4	210505	6541524	786.44
Simulated	MA	46	4	210506	6541524	831.832
Simulated	MA	0	0	210507	6541524	416.79
Simulated	MA	0	0	210508	6541524	419.259
Simulated	MA	0	0	210509	6541524	407.328
Simulated	MA	0	0	210510	6541524	421.725
Simulated	MA	0	0	210511	6541524	418.923
Simulated	MA	0	0	210512	6541524	407.643
Simulated	MA	0	0	210513	6541524	433.94
Simulated	MA	0	0	210514	6541524	393.322
Simulated	MA	55	4	210515	6541524	784.228
Simulated	MA	56	4	210516	6541524	839.096
Simulated	MA	57	4	210517	6541524	877.829
Simulated	MA	58	4	210518	6541524	846.921
Simulated	MA	59	4	210519	6541524	879.004
Simulated	MA	0	0	210520	6541524	404.793
Simulated	MA	0	0	210461	6541525	404.757
Simulated	MA	0	0	210462	6541525	392.066
Simulated	MA	0	0	210463	6541525	425.468
Simulated	MA	0	0	210464	6541525	428.646
Simulated	MA	0	0	210465	6541525	385.691
Simulated	MA	6	5	210466	6541525	774.257
Simulated	MA	7	5	210467	6541525	800.437
Simulated	MA	0	0	210468	6541525	363.007
Simulated	MA	0	0	210469	6541525	382.249
Simulated	MA	10	5	210470	6541525	879.164
Simulated	MA	11	5	210471	6541525	861.974
Simulated	MA	0	0	210472	6541525	442.579
Simulated	MA	0	0	210473	6541525	437.332
Simulated	MA	0	0	210474	6541525	421.174
Simulated	MA	0	0	210475	6541525	413.434
Simulated	MA	0	0	210476	6541525	424.419
Simulated	MA	0	0	210477	6541525	399.271
Simulated	MA	0	0	210478	6541525	396.608
Simulated	MA	0	0	210479	6541525	399.987
Simulated	MA	20	5	210480	6541525	809.33
Simulated	MA	21	5	210481	6541525	791.275
Simulated	MA	0	0	210482	6541525	423.973
Simulated	MA	23	5	210483	6541525	798.216
Simulated	MA	24	5	210484	6541525	824.404
Simulated	MA	0	0	210485	6541525	406.918
Simulated	MA	0	0	210486	6541525	403.8
Simulated	MA	0	0	210487	6541525	421.712
Simulated	MA	0	0	210488	6541525	391.939
Simulated	MA	0	0	210489	6541525	428.562
Simulated	MA	0	0	210490	6541525	394.035
Simulated	MA	0	0	210491	6541525	445.859
Simulated	MA	0	0	210492	6541525	387.86
Simulated	MA	0	0	210493	6541525	406.888
Simulated	MA	0	0	210494	6541525	401.038
Simulated	MA	0	0	210495	6541525	397.586
Simulated	MA	0	0	210496	6541525	433.929
Simulated	MA	0	0	210497	6541525	397.431
Simulated	MA	0	0	210498	6541525	393.15
Simulated	MA	0	0	210499	6541525	422.553
Simulated	MA	0	0	210500	6541525	402.685
Simulated	MA	0	0	210501	6541525	417.73
Simulated	MA	0	0	210502	6541525	408.547
Simulated	MA	0	0	210503	6541525	425.883
Simulated	MA	0	0	210504	6541525	427.907
Simulated	MA	45	5	210505	6541525	802.466
Simulated	MA	46	5	210506	6541525	829.959
Simulated	MA	0	0	210507	6541525	452.942
Simulated	MA	0	0	210508	6541525	400.509
Simulated	MA	0	0	210509	6541525	413.875
Simulated	MA	0	0	210510	6541525	441.986
Simulated	MA	0	0	210511	6541525	381.99
Simulated	MA	0	0	210512	6541525	419.386
Simulated	MA	0	0	210513	6541525	387.19
Simulated	MA	0	0	210514	6541525	369.547
Simulated	MA	55	5	210515	6541525	811.524
Simulated	MA	56	5	210516	6541525	759.68
Simulated	MA	57	5	210517	6541525	799.953
Simulated	MA	58	5	210518	6541525	728.089
Simulated	MA	59	5	210519	6541525	813.049
Simulated	MA	0	0	210520	6541525	399.577
Simulated	MA	0	0	210461	6541526	434.583
Simulated	MA	0	0	210462	6541526	419.563
Simulated	MA	0	0	210463	6541526	391.347
Simulated	MA	0	0	210464	6541526	446.302
Simulated	MA	5	6	210465	6541526	816.745
Simulated	MA	6	6	210466	6541526	760.514
Simulated	MA	0	0	210467	6541526	382.846
Simulated	MA	0	0	210468	6541526	401.607
Simulated	MA	0	0	210469	6541526	414.782
Simulated	MA	10	6	210470	6541526	871.307
Simulated	MA	11	6	210471	6541526	801.241
Simulated	MA	0	0	210472	6541526	403.748
Simulated	MA	0	0	210473	6541526	416.19
Simulated	MA	0	0	210474	6541526	430.655
Simulated	MA	0	0	210475	6541526	423.8
Simulated	MA	0	0	210476	6541526	408.449
Simulated	MA	0	0	210477	6541526	406.938
Simulated	MA	0	0	210478	6541526	452.298
Simulated	MA	0	0	210479	6541526	406.065
Simulated	MA	0	0	210480	6541526	383.423
Simulated	MA	0	0	210481	6541526	419.563
Simulated	MA	0	0	210482	6541526	413.767
Simulated	MA	0	0	210483	6541526	405.59
Simulated	MA	0	0	210484	6541526	391.787
Simulated	MA	0	0	210485	6541526	380.981
Simulated	MA	0	0	210486	6541526	388.288
Simulated	MA	0	0	210487	6541526	416.127
Simulated	MA	0	0	210488	6541526	407.698
Simulated	MA	0	0	210489	6541526	376.664
Simulated	MA	0	0	210490	6541526	421.724
Simulated	MA	0	0	210491	6541526	443.922
Simulated	MA	0	0	210492	6541526	406.64
Simulated	MA	0	0	210493	6541526	420.747
Simulated	MA	0	0	210494	6541526	380.602
Simulated	MA	0	0	210495	6541526	400.096
Simulated	MA	0	0	210496	6541526	393.663
Simulated	MA	0	0	210497	6541526	411.23
Simulated	MA	0	0	210498	6541526	396.749
Simulated	MA	0	0	210499	6541526	403.148
Simulated	MA	0	0	210500	6541526	378.876
Simulated	MA	0	0	210501	6541526	421.181
Simulated	MA	0	0	210502	6541526	429.253
Simulated	MA	0	0	210503	6541526	435.953
Simulated	MA	0	0	210504	6541526	379.588
Simulated	MA	0	0	210505	6541526	398.991
Simulated	MA	0	0	210506	6541526	383.266
Simulated	MA	0	0	210507	6541526	423.15
Simulated	MA	0	0	210508	6541526	428.993
Simulated	MA	0	0	210509	6541526	396.039
Simulated	MA	0	0	210510	6541526	374.576
Simulated	MA	0	0	210511	6541526	381.038
Simulated	MA	0	0	210512	6541526	383.796
Simulated	MA	0	0	210513	6541526	406.79
Simulated	MA	0	0	210514	6541526	377.897
Simulated	MA	55	6	210515	6541526	780.389
Simulated	MA	56	6	210516	6541526	894.405
Simulated	MA	57	6	210517	6541526	825.571
Simulated	MA	58	6	210518	6541526	783.827
Simulated	MA	59	6	210519	6541526	823.706
Simulated	MA	0	0	210520	6541526	422.949
Simulated	MA	0	0	210461	6541527	408.013
Simulated	MA	0	0	210462	6541527	421.367
Simulated	MA	0	0	210463	6541527	376.248
Simulated	MA	0	0	210464	6541527	444.298
Simulated	MA	5	7	210465	6541527	893.703
Simulated	MA	6	7	210466	6541527	802.454
Simulated	MA	0	0	210467	6541527	436.153
Simulated	MA	0	0	210468	6541527	396.092
Simulated	MA	0	0	210469	6541527	410.805
Simulated	MA	0	0	210470	6541527	442.332
Simulated	MA	0	0	210471	6541527	410.739
Simulated	MA	0	0	210472	6541527	416.286
Simulated	MA	0	0	210473	6541527	440.406
Simulated	MA	0	0	210474	6541527	437.931
Simulated	MA	0	0	210475	6541527	462.437
Simulated	MA	0	0	210476	6541527	441.963
Simulated	MA	0	0	210477	6541527	463.062
Simulated	MA	0	0	210478	6541527	408.301
Simulated	MA	0	0	210479	6541527	411.404
Simulated	MA	0	0	210480	6541527	399.751
Simulated	MA	0	0	210481	6541527	363.163
Simulated	MA	0	0	210482	6541527	401.626
Simulated	MA	0	0	210483	6541527	392.464
Simulated	MA	0	0	210484	6541527	399.107
Simulated	MA	0	0	210485	6541527	412.668
Simulated	MA	0	0	210486	6541527	406.784
Simulated	MA	0	0	210487	6541527	431.839
Simulated	MA	0	0	210488	6541527	407.936
Simulated	MA	0	0	210489	6541527	387.483
Simulated	MA	30	7	210490	6541527	816.665
Simulated	MA	31	7	210491	6541527	778.14
Simulated	MA	0	0	210492	6541527	399.081
Simulated	MA	0	0	210493	6541527	400.605
Simulated	MA	0	0	210494	6541527	396.261
Simulated	MA	0	0	210495	6541527	401.062
Simulated	MA	0	0	210496	6541527	412.312
Simulated	MA	0	0	210497	6541527	422.6
Simulated	MA	0	0	210498	6541527	426.901
Simulated	MA	0	0	210499	6541527	389.485
Simulated	MA	0	0	210500	6541527	399.327
Simulated	MA	41	7	210501	6541527	777.449
Simulated	MA	42	7	210502	6541527	843.826
Simulated	MA	0	0	210503	6541527	408.172
Simulated	MA	0	0	210504	6541527	421.874
Simulated	MA	0	0	210505	6541527	440.448
Simulated	MA	0	0	210506	6541527	420.543
Simulated	MA	0	0	210507	6541527	466.319
Simulated	MA	0	0	210508	6541527	410.684
Simulated	MA	0	0	210509	6541527	400.62
Simulated	MA	50	7	210510	6541527	787.767
Simulated	MA	51	7	210511	6541527	853.551
Simulated	MA	0	0	210512	6541527	420.228
Simulated	MA	0	0	210513	6541527	417.262
Simulated	MA	0	0	210514	6541527	417.659
Simulated	MA	55	7	210515	6541527	886.628
Simulated	MA	56	7	210516	6541527	821.366
Simulated	MA	57	7	210517	6541527	760.171
Simulated	MA	58	7	210518	6541527	817.429
Simulated	MA	59	7	210519	6541527	819.122
Simulated	MA	0	0	210520	6541527	396.957
Simulated	MA	0	0	210461	6541528	444.741
Simulated	MA	0	0	210462	6541528	391.875
Simulated	MA	0	0	210463	6541528	422.044
Simulated	MA	0	0	210464	6541528	403.301
Simulated	MA	0	0	210465	6541528	396.826
Simulated	MA	0	0	210466	6541528	392.978
Simulated	MA	0	0	210467	6541528	390.233
Simulated	MA	0	0	210468	6541528	414.241
Simulated	MA	0	0	210469	6541528	411.567
Simulated	MA	0	0	210470	6541528	392.479
Simulated	MA	0	0	210471	6541528	394.363
Simulated	MA	0	0	210472	6541528	381.875
Simulated	MA	0	0	210473	6541528	426.701
Simulated	MA	0	0	210474	6541528	442.583
Simulated	MA	0	0	210475	6541528	439.664
Simulated	MA	0	0	210476	6541528	426.293
Simulated	MA	0	0	210477	6541528	420.154
Simulated	MA	0	0	210478	6541528	404.076
Simulated	MA	0	0	210479	6541528	410.801
Simulated	MA	0	0	210480	6541528	410.717
Simulated	MA	0	0	210481	6541528	433.576
Simulated	MA	0	0	210482	6541528	418.588
Simulated	MA	0	0	210483	6541528	371.383
Simulated	MA	0	0	210484	6541528	398.223
Simulated	MA	0	0	210485	6541528	413.682
Simulated	MA	0	0	210486	6541528	430.91
Simulated	MA	0	0	210487	6541528	422.116
Simulated	MA	0	0	210488	6541528	393.4
Simulated	MA	0	0	210489	6541528	386.479
Simulated	MA	30	8	210490	6541528	839.35
Simulated	MA	31	8	210491	6541528	810.052
Simulated	MA	0	0	210492	6541528	411.292
Simulated	MA	0	0	210493	6541528	415.78
Simulated	MA	0	0	210494	6541528	364.147
Simulated	MA	0	0	210495	6541528	400.289
Simulated	MA	0	0	210496	6541528	422.087
Simulated	MA	0	0	210497	6541528	437.062
Simulated	MA	0	0	210498	6541528	428.996
Simulated	MA	0	0	210499	6541528	411.121
Simulated	MA	0	0	210500	6541528	389.148
Simulated	MA	41	8	210501	6541528	845.264
Simulated	MA	42	8	210502	6541528	843.353
Simulated	MA	0	0	210503	6541528	402.17
Simulated	MA	0	0	210504	6541528	400.963
Simulated	MA	0	0	210505	6541528	399.766
Simulated	MA	0	0	210506	6541528	452.19
Simulated	MA	0	0	210507	6541528	453.913
Simulated	MA	0	0	210508	6541528	415.22
Simulated	MA	0	0	210509	6541528	405.48
Simulated	MA	50	8	210510	6541528	871.455
Simulated	MA	51	8	210511	6541528	850.415
Simulated	MA	0	0	210512	6541528	393.474
Simulated	MA	0	0	210513	6541528	416.573
Simulated	MA	0	0	210514	6541528	420.95
Simulated	MA	0	0	210515	6541528	391.948
Simulated	MA	0	0	210516	6541528	405.664
Simulated	MA	0	0	210517	6541528	438.838
Simulated	MA	0	0	210518	6541528	388.948
Simulated	MA	0	0	210519	6541528	406.704
Simulated	MA	0	0	210520	6541528	384.965
Simulated	MA	0	0	210461	6541529	438.831
Simulated	MA	2	9	210462	6541529	805.242
Simulated	MA	3	9	210463	6541529	826.256
Simulated	MA	4	9	210464	6541529	860.588
Simulated	MA	5	9	210465	6541529	856.511
Simulated	MA	6	9	210466	6541529	856.322
Simulated	MA	0	0	210467	6541529	417.775
Simulated	MA	0	0	210468	6541529	393.524
Simulated	MA	0	0	210469	6541529	383.851
Simulated	MA	0	0	210470	6541529	412.897
Simulated	MA	0	0	210471	6541529	419.217
Simulated	MA	0	0	210472	6541529	397.01
Simulated	MA	0	0	210473	6541529	383.642
Simulated	MA	0	0	210474	6541529	426.85
Simulated	MA	15	9	210475	6541529	884.126
Simulated	MA	16	9	210476	6541529	812.884
Simulated	MA	0	0	210477	6541529	417.152
Simulated	MA	0	0	210478	6541529	444.004
Simulated	MA	0	0	210479	6541529	427.534
Simulated	MA	0	0	210480	6541529	388.117
Simulated	MA	0	0	210481	6541529	391.889
Simulated	MA	0	0	210482	6541529	421.521
Simulated	MA	23	9	210483	6541529	882.245
Simulated	MA	24	9	210484	6541529	768.58
Simulated	MA	25	9	210485	6541529	824.813
Simulated	MA	0	0	210486	6541529	391.518
Simulated	MA	0	0	210487	6541529	409.754
Simulated	MA	0	0	210488	6541529	403.553
Simulated	MA	0	0	210489	6541529	418.726
Simulated	MA	0	0	210490	6541529	440.473
Simulated	MA	0	0	210491	6541529	433.21
Simulated	MA	0	0	210492	6541529	389.911
Simulated	MA	0	0	210493	6541529	420.577
Simulated	MA	0	0	210494	6541529	388.726
Simulated	MA	0	0	210495	6541529	401.494
Simulated	MA	0	0	210496	6541529	390.792
Simulated	MA	0	0	210497	6541529	408.966
Simulated	MA	0	0	210498	6541529	417.889
Simulated	MA	0	0	210499	6541529	409.411
Simulated	MA	0	0	210500	6541529	394.309
Simulated	MA	0	0	210501	6541529	390.592
Simulated	MA	0	0	210502	6541529	417.382
Simulated	MA	0	0	210503	6541529	416.335
Simulated	MA	0	0	210504	6541529	393.282
Simulated	MA	45	9	210505	6541529	809.526
Simulated	MA	46	9	210506	6541529	849.834
Simulated	MA	0	0	210507	6541529	393.849
Simulated	MA	0	0	210508	6541529	417.351
Simulated	MA	0	0	210509	6541529	394.128
Simulated	MA	0	0	210510	6541529	380.848
Simulated	MA	0	0	210511	6541529	414.193
Simulated	MA	0	0	210512	6541529	410.584
Simulated	MA	0	0	210513	6541529	427.381
Simulated	MA	0	0	210514	6541529	398.206
Simulated	MA	0	0	210515	6541529	398.879
Simulated	MA	0	0	210516	6541529	395.654
Simulated	MA	0	0	210517	6541529	409.295
Simulated	MA	0	0	210518	6541529	428.447
Simulated	MA	0	0	210519	6541529	431.018
Simulated	MA	0	0	210520	6541529	410.006
Simulated	MA	0	0	210461	6541530	440.22
Simulated	MA	2	10	210462	6541530	795.493
Simulated	MA	3	10	210463	6541530	788.788
Simulated	MA	4	10	210464	6541530	870.601
Simulated	MA	5	10	210465	6541530	791.113
Simulated	MA	6	10	210466	6541530	803.931
Simulated	MA	0	0	210467	6541530	397.056
Simulated	MA	0	0	210468	6541530	421.285
Simulated	MA	0	0	210469	6541530	437.041
Simulated	MA	0	0	210470	6541530	389.645
Simulated	MA	0	0	210471	6541530	427.601
Simulated	MA	0	0	210472	6541530	412.034
Simulated	MA	0	0	210473	6541530	391.086
Simulated	MA	0	0	210474	6541530	379.43
Simulated	MA	15	10	210475	6541530	829.752
Simulated	MA	16	10	210476	6541530	806.304
Simulated	MA	0	0	210477	6541530	434.202
Simulated	MA	0	0	210478	6541530	416.958
Simulated	MA	0	0	210479	6541530	435.279
Simulated	MA	0	0	210480	6541530	400.074
Simulated	MA	0	0	210481	6541530	436.896
Simulated	MA	0	0	210482	6541530	421.868
Simulated	MA	23	10	210483	6541530	914.341
Simulated	MA	24	10	210484	6541530	810.19
Simulated	MA	25	10	210485	6541530	820.879
Simulated	MA	0	0	210486	6541530	431.8
Simulated	MA	0	0	210487	6541530	422.158
Simulated	MA	0	0	210488	6541530	425.33
Simulated	MA	0	0	210489	6541530	413.993
Simulated	MA	0	0	210490	6541530	420.456
Simulated	MA	0	0	210491	6541530	429.377
Simulated	MA	0	0	210492	6541530	415.573
Simulated	MA	0	0	210493	6541530	432.889
Simulated	MA	0	0	210494	6541530	397.606
Simulated	MA	35	10	210495	6541530	847.031
Simulated	MA	36	10	210496	6541530	762.682
Simulated	MA	37	10	210497	6541530	834.579
Simulated	MA	0	0	210498	6541530	389.743
Simulated	MA	0	0	210499	6541530	392.629
Simulated	MA	0	0	210500	6541530	410.261
Simulated	MA	0	0	210501	6541530	395.328
Simulated	MA	0	0	210502	6541530	385.964
Simulated	MA	0	0	210503	6541530	376.583
Simulated	MA	0	0	210504	6541530	421.338
Simulated	MA	45	10	210505	6541530	836.927
Simulated	MA	46	10	210506	6541530	749.32
Simulated	MA	0	0	210507	6541530	412.097
Simulated	MA	0	0	210508	6541530	379.994
Simulated	MA	0	0	210509	6541530	385.197
Simulated	MA	0	0	210510	6541530	432.592
Simulated	MA	0	0	210511	6541530	437.177
Simulated	MA	0	0	210512	6541530	396.606
Simulated	MA	0	0	210513	6541530	411.753
Simulated	MA	0	0	210514	6541530	392.695
Simulated	MA	0	0	210515	6541530	451.281
Simulated	MA	0	0	210516	6541530	418.519
Simulated	MA	0	0	210517	6541530	448.055
Simulated	MA	0	0	210518	6541530	448.424
Simulated	MA	0	0	210519	6541530	418.098
Simulated	MA	0	0	210520	6541530	377.262
Simulated	MA	0	0	210461	6541531	426.296
Simulated	MA	2	11	210462	6541531	839.692
Simulated	MA	3	11	210463	6541531	786.404
Simulated	MA	4	11	210464	6541531	840.734
Simulated	MA	5	11	210465	6541531	823.428
Simulated	MA	6	11	210466	6541531	757.233
Simulated	MA	0	0	210467	6541531	393.645
Simulated	MA	0	0	210468	6541531	402.753
Simulated	MA	0	0	210469	6541531	419.131
Simulated	MA	10	11	210470	6541531	823.574
Simulated	MA	11	11	210471	6541531	812.201
Simulated	MA	0	0	210472	6541531	446.903
Simulated	MA	0	0	210473	6541531	386.256
Simulated	MA	0	0	210474	6541531	405.08
Simulated	MA	0	0	210475	6541531	418.276
Simulated	MA	0	0	210476	6541531	394.461
Simulated	MA	0	0	210477	6541531	440.15
Simulated	MA	0	0	210478	6541531	387.816
Simulated	MA	0	0	210479	6541531	416.442
Simulated	MA	0	0	210480	6541531	418.044
Simulated	MA	0	0	210481	6541531	399.331
Simulated	MA	0	0	210482	6541531	394.221
Simulated	MA	23	11	210483	6541531	806.013
Simulated	MA	24	11	210484	6541531	837.787
Simulated	MA	25	11	210485	6541531	819.421
Simulated	MA	0	0	210486	6541531	415.196
Simulated	MA	0	0	210487	6541531	421.947
Simulated	MA	0	0	210488	6541531	423.112
Simulated	MA	0	0	210489	6541531	426.802
Simulated	MA	0	0	210490	6541531	419.958
Simulated	MA	0	0	210491	6541531	394.287
Simulated	MA	0	0	210492	6541531	397.198
Simulated	MA	0	0	210493	6541531	397.068
Simulated	MA	0	0	210494	6541531	405.233
Simulated	MA	35	11	210495	6541531	892.174
Simulated	MA	36	11	210496	6541531	819.764
Simulated	MA	37	11	210497	6541531	815.128
Simulated	MA	0	0	210498	6541531	386.197
Simulated	MA	0	0	210499	6541531	408.385
Simulated	MA	0	0	210500	6541531	394.644
Simulated	MA	0	0	210501	6541531	422.644
Simulated	MA	0	0	210502	6541531	381.287
Simulated	MA	0	0	210503	6541531	389.335
Simulated	MA	0	0	210504	6541531	361.363
Simulated	MA	0	0	210505	6541531	392.792
Simulated	MA	0	0	210506	6541531	372.985
Simulated	MA	0	0	210507	6541531	358.319
Simulated	MA	0	0	210508	6541531	387.876
Simulated	MA	0	0	210509	6541531	400.239
Simulated	MA	0	0	210510	6541531	419.519
Simulated	MA	0	0	210511	6541531	429.657
Simulated	MA	0	0	210512	6541531	439.331
Simulated	MA	0	0	210513	6541531	373.823
Simulated	MA	0	0	210514	6541531	398.134
Simulated	MA	0	0	210515	6541531	399.595
Simulated	MA	0	0	210516	6541531	410.646
Simulated	MA	0	0	210517	6541531	403.011
Simulated	MA	0	0	210518	6541531	427.502
Simulated	MA	0	0	210519	6541531	444.759
Simulated	MA	0	0	210520	6541531	421.622
Simulated	MA	0	0	210461	6541532	417.833
Simulated	MA	2	12	210462	6541532	811.113
Simulated	MA	3	12	210463	6541532	755.865
Simulated	MA	4	12	210464	6541532	810.739
Simulated	MA	5	12	210465	6541532	792.437
Simulated	MA	6	12	210466	6541532	731.537
Simulated	MA	0	0	210467	6541532	416.666
Simulated	MA	0	0	210468	6541532	421.331
Simulated	MA	0	0	210469	6541532	409.689
Simulated	MA	10	12	210470	6541532	859.214
Simulated	MA	11	12	210471	6541532	827.885
Simulated	MA	0	0	210472	6541532	385.747
Simulated	MA	0	0	210473	6541532	392.991
Simulated	MA	0	0	210474	6541532	419.911
Simulated	MA	0	0	210475	6541532	407.113
Simulated	MA	0	0	210476	6541532	410.03
Simulated	MA	0	0	210477	6541532	403.158
Simulated	MA	0	0	210478	6541532	394.858
Simulated	MA	0	0	210479	6541532	397.031
Simulated	MA	0	0	210480	6541532	435.206
Simulated	MA	21	12	210481	6541532	818.222
Simulated	MA	22	12	210482	6541532	817.094
Simulated	MA	0	0	210483	6541532	438.341
Simulated	MA	0	0	210484	6541532	381.25
Simulated	MA	0	0	210485	6541532	398.971
Simulated	MA	0	0	210486	6541532	427.356
Simulated	MA	0	0	210487	6541532	439.427
Simulated	MA	0	0	210488	6541532	417.988
Simulated	MA	0	0	210489	6541532	378.533
Simulated	MA	0	0	210490	6541532	412.496
Simulated	MA	0	0	210491	6541532	398.52
Simulated	MA	0	0	210492	6541532	392.49
Simulated	MA	0	0	210493	6541532	428.547
Simulated	MA	0	0	210494	6541532	406.479
Simulated	MA	35	12	210495	6541532	911.576
Simulated	MA	36	12	210496	6541532	826.11
Simulated	MA	37	12	210497	6541532	785.541
Simulated	MA	0	0	210498	6541532	366.37
Simulated	MA	0	0	210499	6541532	432.432
Simulated	MA	0	0	210500	6541532	393.314
Simulated	MA	0	0	210501	6541532	440.691
Simulated	MA	0	0	210502	6541532	431.945
Simulated	MA	0	0	210503	6541532	396.904
Simulated	MA	0	0	210504	6541532	419.103
Simulated	MA	0	0	210505	6541532	387.352
Simulated	MA	0	0	210506	6541532	414.658
Simulated	MA	0	0	210507	6541532	411.835
Simulated	MA	0	0	210508	6541532	399.001
Simulated	MA	0	0	210509	6541532	408.354
Simulated	MA	0	0	210510	6541532	417.064
Simulated	MA	0	0	210511	6541532	446.431
Simulated	MA	0	0	210512	6541532	404.566
Simulated	MA	0	0	210513	6541532	400.283
Simulated	MA	0	0	210514	6541532	419.548
Simulated	MA	55	12	210515	6541532	834.555
Simulated	MA	56	12	210516	6541532	786.998
Simulated	MA	0	0	210517	6541532	399.832
Simulated	MA	0	0	210518	6541532	406.608
Simulated	MA	0	0	210519	6541532	421.941
Simulated	MA	0	0	210520	6541532	408.697
Simulated	MA	0	0	210461	6541533	427.03
Simulated	MA	2	13	210462	6541533	835.653
Simulated	MA	3	13	210463	6541533	831.633
Simulated	MA	4	13	210464	6541533	855.465
Simulated	MA	5	13	210465	6541533	833.911
Simulated	MA	6	13	210466	6541533	763.104
Simulated	MA	0	0	210467	6541533	445.455
Simulated	MA	0	0	210468	6541533	429.078
Simulated	MA	0	0	210469	6541533	411.574
Simulated	MA	0	0	210470	6541533	402.204
Simulated	MA	0	0	210471	6541533	413.929
Simulated	MA	0	0	210472	6541533	424.291
Simulated	MA	0	0	210473	6541533	423.185
Simulated	MA	0	0	210474	6541533	430.585
Simulated	MA	0	0	210475	6541533	425.629
Simulated	MA	0	0	210476	6541533	437.946
Simulated	MA	0	0	210477	6541533	426.23
Simulated	MA	0	0	210478	6541533	407.574
Simulated	MA	0	0	210479	6541533	386.587
Simulated	MA	0	0	210480	6541533	407.106
Simulated	MA	21	13	210481	6541533	843.819
Simulated	MA	22	13	210482	6541533	840.69
Simulated	MA	0	0	210483	6541533	396.851
Simulated	MA	0	0	210484	6541533	407.754
Simulated	MA	0	0	210485	6541533	389.739
Simulated	MA	0	0	210486	6541533	385.635
Simulated	MA	0	0	210487	6541533	445.161
Simulated	MA	0	0	210488	6541533	432.367
Simulated	MA	0	0	210489	6541533	397.687
Simulated	MA	0	0	210490	6541533	402.487
Simulated	MA	0	0	210491	6541533	382.218
Simulated	MA	0	0	210492	6541533	402.095
Simulated	MA	0	0	210493	6541533	409.662
Simulated	MA	0	0	210494	6541533	439.454
Simulated	MA	0	0	210495	6541533	440.913
Simulated	MA	0	0	210496	6541533	406.385
Simulated	MA	0	0	210497	6541533	421.557
Simulated	MA	0	0	210498	6541533	410.132
Simulated	MA	0	0	210499	6541533	415.549
Simulated	MA	0	0	210500	6541533	434.604
Simulated	MA	0	0	210501	6541533	420.832
Simulated	MA	0	0	210502	6541533	430.195
Simulated	MA	0	0	210503	6541533	431.777
Simulated	MA	0	0	210504	6541533	399.536
Simulated	MA	0	0	210505	6541533	402.836
Simulated	MA	0	0	210506	6541533	400.781
Simulated	MA	0	0	210507	6541533	429.944
Simulated	MA	0	0	210508	6541533	444.62
Simulated	MA	0	0	210509	6541533	383.815
Simulated	MA	0	0	210510	6541533	433.948
Simulated	MA	0	0	210511	6541533	411.12
Simulated	MA	0	0	210512	6541533	433.413
Simulated	MA	0	0	210513	6541533	383.524
Simulated	MA	0	0	210514	6541533	412.64
Simulated	MA	55	13	210515	6541533	840.079
Simulated	MA	56	13	210516	6541533	854.506
Simulated	MA	0	0	210517	6541533	428.236
Simulated	MA	58	13	210518	6541533	845.519
Simulated	MA	59	13	210519	6541533	786.015
Simulated	MA	60	13	210520	6541533	803.9
Simulated	MA	0	0	210461	6541534	429.021
Simulated	MA	0	0	210462	6541534	398.027
Simulated	MA	0	0	210463	6541534	397.857
Simulated	MA	0	0	210464	6541534	409.476
Simulated	MA	0	0	210465	6541534	417.886
Simulated	MA	0	0	210466	6541534	414.392
Simulated	MA	0	0	210467	6541534	442.544
Simulated	MA	0	0	210468	6541534	420.789
Simulated	MA	0	0	210469	6541534	418.156
Simulated	MA	0	0	210470	6541534	409.081
Simulated	MA	0	0	210471	6541534	421.924
Simulated	MA	0	0	210472	6541534	388.207
Simulated	MA	0	0	210473	6541534	397.046
Simulated	MA	0	0	210474	6541534	386.182
Simulated	MA	0	0	210475	6541534	438.097
Simulated	MA	0	0	210476	6541534	461.508
Simulated	MA	0	0	210477	6541534	395.963
Simulated	MA	0	0	210478	6541534	403.246
Simulated	MA	0	0	210479	6541534	385.595
Simulated	MA	0	0	210480	6541534	430.134
Simulated	MA	0	0	210481	6541534	418.726
Simulated	MA	0	0	210482	6541534	441.249
Simulated	MA	0	0	210483	6541534	412.961
Simulated	MA	0	0	210484	6541534	423.227
Simulated	MA	0	0	210485	6541534	422.266
Simulated	MA	0	0	210486	6541534	405.161
Simulated	MA	0	0	210487	6541534	423.689
Simulated	MA	0	0	210488	6541534	424.441
Simulated	MA	0	0	210489	6541534	393.694
Simulated	MA	0	0	210490	6541534	400.309
Simulated	MA	0	0	210491	6541534	415.908
Simulated	MA	0	0	210492	6541534	412.026
Simulated	MA	0	0	210493	6541534	477.454
Simulated	MA	0	0	210494	6541534	417.93
Simulated	MA	0	0	210495	6541534	420.675
Simulated	MA	0	0	210496	6541534	412.45
Simulated	MA	0	0	210497	6541534	380.229
Simulated	MA	0	0	210498	6541534	414.01
Simulated	MA	0	0	210499	6541534	422.708
Simulated	MA	0	0	210500	6541534	435.326
Simulated	MA	0	0	210501	6541534	416.693
Simulated	MA	0	0	210502	6541534	443.267
Simulated	MA	0	0	210503	6541534	433.773
Simulated	MA	0	0	210504	6541534	418.518
Simulated	MA	0	0	210505	6541534	427.225
Simulated	MA	0	0	210506	6541534	395.875
Simulated	MA	0	0	210507	6541534	409.818
Simulated	MA	0	0	210508	6541534	404.481
Simulated	MA	0	0	210509	6541534	420.743
Simulated	MA	0	0	210510	6541534	402.567
Simulated	MA	0	0	210511	6541534	425.8
Simulated	MA	0	0	210512	6541534	402.791
Simulated	MA	0	0	210513	6541534	399.864
Simulated	MA	0	0	210514	6541534	415.767
Simulated	MA	0	0	210515	6541534	419.198
Simulated	MA	0	0	210516	6541534	433.046
Simulated	MA	0	0	210517	6541534	419.219
Simulated	MA	58	14	210518	6541534	851.068
Simulated	MA	59	14	210519	6541534	815.886
Simulated	MA	60	14	210520	6541534	826.086
Simulated	MA	0	0	210461	6541535	442.374
Simulated	MA	0	0	210462	6541535	398.09
Simulated	MA	3	15	210463	6541535	820.399
Simulated	MA	4	15	210464	6541535	786.094
Simulated	MA	0	0	210465	6541535	393.375
Simulated	MA	0	0	210466	6541535	407.174
Simulated	MA	0	0	210467	6541535	404.474
Simulated	MA	0	0	210468	6541535	405.63
Simulated	MA	0	0	210469	6541535	416.715
Simulated	MA	0	0	210470	6541535	412.45
Simulated	MA	0	0	210471	6541535	396.261
Simulated	MA	0	0	210472	6541535	409.236
Simulated	MA	0	0	210473	6541535	429.971
Simulated	MA	0	0	210474	6541535	420.507
Simulated	MA	15	15	210475	6541535	826.763
Simulated	MA	16	15	210476	6541535	890.462
Simulated	MA	17	15	210477	6541535	821.341
Simulated	MA	0	0	210478	6541535	403.15
Simulated	MA	0	0	210479	6541535	355.962
Simulated	MA	0	0	210480	6541535	436.825
Simulated	MA	0	0	210481	6541535	426.229
Simulated	MA	0	0	210482	6541535	432.95
Simulated	MA	0	0	210483	6541535	412.9
Simulated	MA	0	0	210484	6541535	415.44
Simulated	MA	0	0	210485	6541535	379.661
Simulated	MA	0	0	210486	6541535	409.007
Simulated	MA	0	0	210487	6541535	432.33
Simulated	MA	28	15	210488	6541535	807.352
Simulated	MA	29	15	210489	6541535	848.969
Simulated	MA	0	0	210490	6541535	389.086
Simulated	MA	0	0	210491	6541535	389.51
Simulated	MA	0	0	210492	6541535	401.275
Simulated	MA	0	0	210493	6541535	389.32
Simulated	MA	0	0	210494	6541535	391.844
Simulated	MA	0	0	210495	6541535	372.039
Simulated	MA	0	0	210496	6541535	395.86
Simulated	MA	0	0	210497	6541535	410.8
Simulated	MA	0	0	210498	6541535	384.859
Simulated	MA	0	0	210499	6541535	446.557
Simulated	MA	40	15	210500	6541535	831.353
Simulated	MA	41	15	210501	6541535	760.439
Simulated	MA	0	0	210502	6541535	425.294
Simulated	MA	0	0	210503	6541535	414.89
Simulated	MA	0	0	210504	6541535	406.855
Simulated	MA	0	0	210505	6541535	395.706
Simulated	MA	0	0	210506	6541535	415.672
Simulated	MA	47	15	210507	6541535	800.652
Simulated	MA	48	15	210508	6541535	871.729
Simulated	MA	49	15	210509	6541535	874.371
Simulated	MA	0	0	210510	6541535	421.88
Simulated	MA	0	0	210511	6541535	403.898
Simulated	MA	0	0	210512	6541535	417.113
Simulated	MA	0	0	210513	6541535	435.755
Simulated	MA	0	0	210514	6541535	375.7
Simulated	MA	0	0	210515	6541535	404.995
Simulated	MA	0	0	210516	6541535	385.733
Simulated	MA	0	0	210517	6541535	455.747
Simulated	MA	58	15	210518	6541535	758.708
Simulated	MA	59	15	210519	6541535	796.532
Simulated	MA	60	15	210520	6541535	786.274
Simulated	MA	0	0	210461	6541536	419.356
Simulated	MA	0	0	210462	6541536	401.347
Simulated	MA	3	16	210463	6541536	788.208
Simulated	MA	4	16	210464	6541536	888.525
Simulated	MA	0	0	210465	6541536	428.356
Simulated	MA	6	16	210466	6541536	876.184
Simulated	MA	7	16	210467	6541536	881.87
Simulated	MA	0	0	210468	6541536	432.525
Simulated	MA	0	0	210469	6541536	369.131
Simulated	MA	0	0	210470	6541536	433.722
Simulated	MA	0	0	210471	6541536	409.788
Simulated	MA	0	0	210472	6541536	440.462
Simulated	MA	0	0	210473	6541536	383.83
Simulated	MA	0	0	210474	6541536	427.03
Simulated	MA	15	16	210475	6541536	855.773
Simulated	MA	16	16	210476	6541536	801.635
Simulated	MA	17	16	210477	6541536	819.283
Simulated	MA	0	0	210478	6541536	409.202
Simulated	MA	0	0	210479	6541536	412.028
Simulated	MA	0	0	210480	6541536	412.014
Simulated	MA	0	0	210481	6541536	432.108
Simulated	MA	0	0	210482	6541536	408.735
Simulated	MA	0	0	210483	6541536	420.229
Simulated	MA	0	0	210484	6541536	427.185
Simulated	MA	0	0	210485	6541536	396.635
Simulated	MA	0	0	210486	6541536	413.861
Simulated	MA	0	0	210487	6541536	433.542
Simulated	MA	28	16	210488	6541536	812.812
Simulated	MA	29	16	210489	6541536	808.496
Simulated	MA	0	0	210490	6541536	416.591
Simulated	MA	0	0	210491	6541536	413.192
Simulated	MA	0	0	210492	6541536	385.776
Simulated	MA	0	0	210493	6541536	410.652
Simulated	MA	0	0	210494	6541536	420.534
Simulated	MA	0	0	210495	6541536	415.352
Simulated	MA	0	0	210496	6541536	421.352
Simulated	MA	0	0	210497	6541536	418.916
Simulated	MA	0	0	210498	6541536	404.283
Simulated	MA	0	0	210499	6541536	405.824
Simulated	MA	40	16	210500	6541536	829.812
Simulated	MA	41	16	210501	6541536	838.656
Simulated	MA	0	0	210502	6541536	430.979
Simulated	MA	0	0	210503	6541536	413.912
Simulated	MA	0	0	210504	6541536	426.028
Simulated	MA	0	0	210505	6541536	419.056
Simulated	MA	0	0	210506	6541536	430.876
Simulated	MA	47	16	210507	6541536	815.629
Simulated	MA	48	16	210508	6541536	842.567
Simulated	MA	49	16	210509	6541536	762.284
Simulated	MA	0	0	210510	6541536	407.064
Simulated	MA	0	0	210511	6541536	449.436
Simulated	MA	0	0	210512	6541536	444.125
Simulated	MA	0	0	210513	6541536	408.731
Simulated	MA	0	0	210514	6541536	413.101
Simulated	MA	0	0	210515	6541536	431.966
Simulated	MA	0	0	210516	6541536	396.915
Simulated	MA	0	0	210517	6541536	399.552
Simulated	MA	0	0	210518	6541536	396.648
Simulated	MA	0	0	210519	6541536	418.195
Simulated	MA	0	0	210520	6541536	386.487
Simulated	MA	0	0	210461	6541537	408.739
Simulated	MA	0	0	210462	6541537	399.973
Simulated	MA	0	0	210463	6541537	414.667
Simulated	MA	0	0	210464	6541537	395.225
Simulated	MA	0	0	210465	6541537	422.886
Simulated	MA	6	17	210466	6541537	861.665
Simulated	MA	7	17	210467	6541537	865.245
Simulated	MA	0	0	210468	6541537	406.708
Simulated	MA	0	0	210469	6541537	407.591
Simulated	MA	0	0	210470	6541537	380.751
Simulated	MA	0	0	210471	6541537	436.51
Simulated	MA	0	0	210472	6541537	389.45
Simulated	MA	0	0	210473	6541537	383.936
Simulated	MA	0	0	210474	6541537	396.729
Simulated	MA	15	17	210475	6541537	817.583
Simulated	MA	16	17	210476	6541537	814.467
Simulated	MA	17	17	210477	6541537	831.923
Simulated	MA	0	0	210478	6541537	402.775
Simulated	MA	0	0	210479	6541537	409.01
Simulated	MA	0	0	210480	6541537	416.134
Simulated	MA	0	0	210481	6541537	440.85
Simulated	MA	0	0	210482	6541537	438.919
Simulated	MA	0	0	210483	6541537	394.779
Simulated	MA	0	0	210484	6541537	470.83
Simulated	MA	0	0	210485	6541537	389.145
Simulated	MA	0	0	210486	6541537	450.508
Simulated	MA	0	0	210487	6541537	417.845
Simulated	MA	0	0	210488	6541537	433.683
Simulated	MA	0	0	210489	6541537	424.638
Simulated	MA	0	0	210490	6541537	398.576
Simulated	MA	0	0	210491	6541537	390.24
Simulated	MA	0	0	210492	6541537	410.701
Simulated	MA	0	0	210493	6541537	396.314
Simulated	MA	0	0	210494	6541537	409.24
Simulated	MA	0	0	210495	6541537	431.263
Simulated	MA	0	0	210496	6541537	422.564
Simulated	MA	0	0	210497	6541537	397.569
Simulated	MA	0	0	210498	6541537	407.559
Simulated	MA	0	0	210499	6541537	430.104
Simulated	MA	0	0	210500	6541537	425.015
Simulated	MA	0	0	210501	6541537	411.43
Simulated	MA	0	0	210502	6541537	421.099
Simulated	MA	0	0	210503	6541537	414.16
Simulated	MA	0	0	210504	6541537	421.827
Simulated	MA	0	0	210505	6541537	464.899
Simulated	MA	0	0	210506	6541537	415.444
Simulated	MA	47	17	210507	6541537	792.485
Simulated	MA	48	17	210508	6541537	799.899
Simulated	MA	49	17	210509	6541537	803.738
Simulated	MA	0	0	210510	6541537	384.936
Simulated	MA	0	0	210511	6541537	406.563
Simulated	MA	0	0	210512	6541537	425.864
Simulated	MA	0	0	210513	6541537	435.513
Simulated	MA	0	0	210514	6541537	426.815
Simulated	MA	0	0	210515	6541537	368.617
Simulated	MA	0	0	210516	6541537	403.931
Simulated	MA	0	0	210517	6541537	395.938
Simulated	MA	0	0	210518	6541537	396.542
Simulated	MA	0	0	210519	6541537	409.39
Simulated	MA	0	0	210520	6541537	416.109
Simulated	MA	0	0	210461	6541538	435.025
Simulated	MA	0	0	210462	6541538	409.779
Simulated	MA	0	0	210463	6541538	391.284
Simulated	MA	0	0	210464	6541538	431.828
Simulated	MA	0	0	210465	6541538	414.761
Simulated	MA	0	0	210466	6541538	432.622
Simulated	MA	0	0	210467	6541538	394.388
Simulated	MA	0	0	210468	6541538	439.184
Simulated	MA	0	0	210469	6541538	408.503
Simulated	MA	10	18	210470	6541538	749.435
Simulated	MA	11	18	210471	6541538	838.86
Simulated	MA	0	0	210472	6541538	434.723
Simulated	MA	0	0	210473	6541538	397.49
Simulated	MA	0	0	210474	6541538	378.558
Simulated	MA	0	0	210475	6541538	419.226
Simulated	MA	0	0	210476	6541538	395.418
Simulated	MA	0	0	210477	6541538	421.034
Simulated	MA	0	0	210478	6541538	381.773
Simulated	MA	0	0	210479	6541538	443.517
Simulated	MA	0	0	210480	6541538	437.873
Simulated	MA	0	0	210481	6541538	424.613
Simulated	MA	0	0	210482	6541538	425.081
Simulated	MA	23	18	210483	6541538	832.859
Simulated	MA	24	18	210484	6541538	850.002
Simulated	MA	0	0	210485	6541538	370.07
Simulated	MA	0	0	210486	6541538	430.603
Simulated	MA	0	0	210487	6541538	410.832
Simulated	MA	0	0	210488	6541538	401.099
Simulated	MA	0	0	210489	6541538	390.161
Simulated	MA	0	0	210490	6541538	384.752
Simulated	MA	0	0	210491	6541538	393.411
Simulated	MA	32	18	210492	6541538	860.558
Simulated	MA	33	18	210493	6541538	752.779
Simulated	MA	0	0	210494	6541538	401.535
Simulated	MA	0	0	210495	6541538	413.543
Simulated	MA	0	0	210496	6541538	434.349
Simulated	MA	0	0	210497	6541538	420.771
Simulated	MA	0	0	210498	6541538	409.002
Simulated	MA	0	0	210499	6541538	385.907
Simulated	MA	0	0	210500	6541538	417.525
Simulated	MA	0	0	210501	6541538	400.501
Simulated	MA	0	0	210502	6541538	407.985
Simulated	MA	0	0	210503	6541538	420.388
Simulated	MA	0	0	210504	6541538	426.722
Simulated	MA	0	0	210505	6541538	407.299
Simulated	MA	0	0	210506	6541538	448.659
Simulated	MA	0	0	210507	6541538	394.752
Simulated	MA	0	0	210508	6541538	417.47
Simulated	MA	0	0	210509	6541538	428.014
Simulated	MA	0	0	210510	6541538	455.101
Simulated	MA	0	0	210511	6541538	412.793
Simulated	MA	0	0	210512	6541538	410.682
Simulated	MA	0	0	210513	6541538	458.771
Simulated	MA	0	0	210514	6541538	414.326
Simulated	MA	55	18	210515	6541538	757.339
Simulated	MA	56	18	210516	6541538	834.041
Simulated	MA	0	0	210517	6541538	407.582
Simulated	MA	0	0	210518	6541538	408.856
Simulated	MA	59	18	210519	6541538	775.098
Simulated	MA	60	18	210520	6541538	770.092
Simulated	MA	0	0	210461	6541539	412.322
Simulated	MA	0	0	210462	6541539	404.529
Simulated	MA	0	0	210463	6541539	427.684
Simulated	MA	0	0	210464	6541539	452.365
Simulated	MA	0	0	210465	6541539	382.142
Simulated	MA	0	0	210466	6541539	400.62
Simulated	MA	0	0	210467	6541539	413.131
Simulated	MA	0	0	210468	6541539	389.966
Simulated	MA	0	0	210469	6541539	386.64
Simulated	MA	10	19	210470	6541539	763.789
Simulated	MA	11	19	210471	6541539	780.438
Simulated	MA	0	0	210472	6541539	374.271
Simulated	MA	0	0	210473	6541539	359.655
Simulated	MA	0	0	210474	6541539	394.9
Simulated	MA	0	0	210475	6541539	382.596
Simulated	MA	0	0	210476	6541539	422.197
Simulated	MA	0	0	210477	6541539	403.68
Simulated	MA	18	19	210478	6541539	705.477
Simulated	MA	19	19	210479	6541539	841.919
Simulated	MA	0	0	210480	6541539	421.322
Simulated	MA	0	0	210481	6541539	406.341
Simulated	MA	0	0	210482	6541539	443.684
Simulated	MA	23	19	210483	6541539	791.117
Simulated	MA	24	19	210484	6541539	822.048
Simulated	MA	0	0	210485	6541539	406.477
Simulated	MA	0	0	210486	6541539	409.897
Simulated	MA	0	0	210487	6541539	416.373
Simulated	MA	0	0	210488	6541539	430.043
Simulated	MA	0	0	210489	6541539	392.243
Simulated	MA	0	0	210490	6541539	418.89
Simulated	MA	0	0	210491	6541539	401.188
Simulated	MA	32	19	210492	6541539	757.219
Simulated	MA	33	19	210493	6541539	812.083
Simulated	MA	0	0	210494	6541539	416.806
Simulated	MA	0	0	210495	6541539	426.033
Simulated	MA	0	0	210496	6541539	434.512
Simulated	MA	0	0	210497	6541539	431.855
Simulated	MA	0	0	210498	6541539	383.589
Simulated	MA	0	0	210499	6541539	411.862
Simulated	MA	0	0	210500	6541539	420.115
Simulated	MA	41	19	210501	6541539	846.927
Simulated	MA	42	19	210502	6541539	879.025
Simulated	MA	0	0	210503	6541539	460.013
Simulated	MA	0	0	210504	6541539	430.256
Simulated	MA	0	0	210505	6541539	409.287
Simulated	MA	0	0	210506	6541539	401.936
Simulated	MA	0	0	210507	6541539	423.933
Simulated	MA	0	0	210508	6541539	441.219
Simulated	MA	0	0	210509	6541539	421.369
Simulated	MA	0	0	210510	6541539	407.123
Simulated	MA	0	0	210511	6541539	421.582
Simulated	MA	0	0	210512	6541539	413.248
Simulated	MA	0	0	210513	6541539	441.527
Simulated	MA	0	0	210514	6541539	445.22
Simulated	MA	55	19	210515	6541539	776.663
Simulated	MA	56	19	210516	6541539	856.904
Simulated	MA	0	0	210517	6541539	450.691
Simulated	MA	0	0	210518	6541539	384.482
Simulated	MA	59	19	210519	6541539	845.258
Simulated	MA	60	19	210520	6541539	824.983
Simulated	MA	0	0	210461	6541540	404.272
Simulated	MA	0	0	210462	6541540	391.36
Simulated	MA	0	0	210463	6541540	415.502
Simulated	MA	0	0	210464	6541540	407.848
Simulated	MA	0	0	210465	6541540	417.759
Simulated	MA	6	20	210466	6541540	819.063
Simulated	MA	7	20	210467	6541540	807.153
Simulated	MA	0	0	210468	6541540	363.404
Simulated	MA	0	0	210469	6541540	411.619
Simulated	MA	0	0	210470	6541540	375.386
Simulated	MA	0	0	210471	6541540	391.223
Simulated	MA	0	0	210472	6541540	413.694
Simulated	MA	0	0	210473	6541540	388.516
Simulated	MA	0	0	210474	6541540	371.343
Simulated	MA	0	0	210475	6541540	353.043
Simulated	MA	0	0	210476	6541540	403.802
Simulated	MA	0	0	210477	6541540	460.345
Simulated	MA	18	20	210478	6541540	830.702
Simulated	MA	19	20	210479	6541540	879.172
Simulated	MA	0	0	210480	6541540	417.146
Simulated	MA	0	0	210481	6541540	409.314
Simulated	MA	0	0	210482	6541540	413.866
Simulated	MA	0	0	210483	6541540	417.299
Simulated	MA	0	0	210484	6541540	422.98
Simulated	MA	0	0	210485	6541540	430.669
Simulated	MA	0	0	210486	6541540	433.827
Simulated	MA	0	0	210487	6541540	430.747
Simulated	MA	0	0	210488	6541540	428.759
Simulated	MA	0	0	210489	6541540	404.867
Simulated	MA	30	20	210490	6541540	820.926
Simulated	MA	31	20	210491	6541540	782.764
Simulated	MA	0	0	210492	6541540	390.445
Simulated	MA	0	0	210493	6541540	413.385
Simulated	MA	0	0	210494	6541540	395.071
Simulated	MA	0	0	210495	6541540	428.394
Simulated	MA	0	0	210496	6541540	449.854
Simulated	MA	0	0	210497	6541540	460.736
Simulated	MA	0	0	210498	6541540	389.982
Simulated	MA	0	0	210499	6541540	413.975
Simulated	MA	0	0	210500	6541540	426.501
Simulated	MA	41	20	210501	6541540	887.688
Simulated	MA	42	20	210502	6541540	860.2
Simulated	MA	0	0	210503	6541540	399.842
Simulated	MA	0	0	210504	6541540	424.54
Simulated	MA	0	0	210505	6541540	435.029
Simulated	MA	0	0	210506	6541540	414.04
Simulated	MA	0	0	210507	6541540	402.921
Simulated	MA	0	0	210508	6541540	435
Simulated	MA	0	0	210509	6541540	460.171
Simulated	MA	0	0	210510	6541540	425.208
Simulated	MA	0	0	210511	6541540	439.298
Simulated	MA	52	20	210512	6541540	856.647
Simulated	MA	53	20	210513	6541540	860.845
Simulated	MA	0	0	210514	6541540	427.041
Simulated	MA	0	0	210515	6541540	373.161
Simulated	MA	0	0	210516	6541540	428.558
Simulated	MA	0	0	210517	6541540	421.545
Simulated	MA	0	0	210518	6541540	403.594
Simulated	MA	0	0	210519	6541540	370.732
Simulated	MA	0	0	210520	6541540	400.348
Simulated	MA	1	21	210461	6541541	774.798
Simulated	MA	2	21	210462	6541541	845.971
Simulated	MA	0	0	210463	6541541	405.838
Simulated	MA	0	0	210464	6541541	388.148
Simulated	MA	0	0	210465	6541541	419.785
Simulated	MA	6	21	210466	6541541	767.72
Simulated	MA	7	21	210467	6541541	848.799
Simulated	MA	0	0	210468	6541541	384.868
Simulated	MA	0	0	210469	6541541	405.573
Simulated	MA	0	0	210470	6541541	444.613
Simulated	MA	0	0	210471	6541541	375.048
Simulated	MA	0	0	210472	6541541	423.275
Simulated	MA	0	0	210473	6541541	376.761
Simulated	MA	0	0	210474	6541541	388.139
Simulated	MA	0	0	210475	6541541	414.937
Simulated	MA	0	0	210476	6541541	392.969
Simulated	MA	0	0	210477	6541541	426.498
Simulated	MA	0	0	210478	6541541	408.889
Simulated	MA	0	0	210479	6541541	411.126
Simulated	MA	0	0	210480	6541541	411.332
Simulated	MA	0	0	210481	6541541	401.186
Simulated	MA	0	0	210482	6541541	372.198
Simulated	MA	0	0	210483	6541541	412.817
Simulated	MA	0	0	210484	6541541	457.52
Simulated	MA	0	0	210485	6541541	428.241
Simulated	MA	0	0	210486	6541541	423.005
Simulated	MA	0	0	210487	6541541	409.539
Simulated	MA	0	0	210488	6541541	416.967
Simulated	MA	0	0	210489	6541541	422.559
Simulated	MA	30	21	210490	6541541	873.28
Simulated	MA	31	21	210491	6541541	815.051
Simulated	MA	0	0	210492	6541541	418.998
Simulated	MA	0	0	210493	6541541	392.244
Simulated	MA	0	0	210494	6541541	425.579
Simulated	MA	0	0	210495	6541541	421.838
Simulated	MA	36	21	210496	6541541	845.108
Simulated	MA	37	21	210497	6541541	911.038
Simulated	MA	0	0	210498	6541541	387.749
Simulated	MA	0	0	210499	6541541	401.812
Simulated	MA	0	0	210500	6541541	408.412
Simulated	MA	0	0	210501	6541541	447.31
Simulated	MA	0	0	210502	6541541	466.556
Simulated	MA	0	0	210503	6541541	446.878
Simulated	MA	0	0	210504	6541541	396.758
Simulated	MA	0	0	210505	6541541	440.863
Simulated	MA	0	0	210506	6541541	413.424
Simulated	MA	0	0	210507	6541541	422.499
Simulated	MA	0	0	210508	6541541	402.554
Simulated	MA	0	0	210509	6541541	434.035
Simulated	MA	0	0	210510	6541541	367.502
Simulated	MA	0	0	210511	6541541	407.088
Simulated	MA	52	21	210512	6541541	819.505
Simulated	MA	53	21	210513	6541541	840.313
Simulated	MA	0	0	210514	6541541	409.125
Simulated	MA	0	0	210515	6541541	378.473
Simulated	MA	0	0	210516	6541541	420.344
Simulated	MA	0	0	210517	6541541	440.726
Simulated	MA	0	0	210518	6541541	416.128
Simulated	MA	0	0	210519	6541541	435.758
Simulated	MA	0	0	210520	6541541	423.323
Simulated	MA	1	22	210461	6541542	822.023
Simulated	MA	2	22	210462	6541542	786.892
Simulated	MA	0	0	210463	6541542	393.527
Simulated	MA	0	0	210464	6541542	410.449
Simulated	MA	0	0	210465	6541542	397.019
Simulated	MA	0	0	210466	6541542	431.226
Simulated	MA	0	0	210467	6541542	413.016
Simulated	MA	0	0	210468	6541542	440.065
Simulated	MA	0	0	210469	6541542	416.775
Simulated	MA	0	0	210470	6541542	437.291
Simulated	MA	0	0	210471	6541542	413.662
Simulated	MA	12	22	210472	6541542	839.2
Simulated	MA	13	22	210473	6541542	764.221
Simulated	MA	0	0	210474	6541542	401.106
Simulated	MA	0	0	210475	6541542	429.4
Simulated	MA	0	0	210476	6541542	397.052
Simulated	MA	0	0	210477	6541542	398.556
Simulated	MA	0	0	210478	6541542	406.58
Simulated	MA	0	0	210479	6541542	427.441
Simulated	MA	20	22	210480	6541542	849.062
Simulated	MA	21	22	210481	6541542	846.238
Simulated	MA	22	22	210482	6541542	874.009
Simulated	MA	23	22	210483	6541542	856.571
Simulated	MA	24	22	210484	6541542	813.029
Simulated	MA	0	0	210485	6541542	436.171
Simulated	MA	0	0	210486	6541542	458.556
Simulated	MA	0	0	210487	6541542	408.408
Simulated	MA	0	0	210488	6541542	437.107
Simulated	MA	0	0	210489	6541542	403.119
Simulated	MA	0	0	210490	6541542	397.045
Simulated	MA	0	0	210491	6541542	403.427
Simulated	MA	0	0	210492	6541542	398.925
Simulated	MA	0	0	210493	6541542	407.239
Simulated	MA	0	0	210494	6541542	394.394
Simulated	MA	0	0	210495	6541542	392.218
Simulated	MA	36	22	210496	6541542	832.843
Simulated	MA	37	22	210497	6541542	859.165
Simulated	MA	0	0	210498	6541542	396.24
Simulated	MA	0	0	210499	6541542	416.145
Simulated	MA	0	0	210500	6541542	369.907
Simulated	MA	0	0	210501	6541542	386.253
Simulated	MA	0	0	210502	6541542	379.092
Simulated	MA	0	0	210503	6541542	449.626
Simulated	MA	0	0	210504	6541542	415.699
Simulated	MA	0	0	210505	6541542	420.973
Simulated	MA	0	0	210506	6541542	405.65
Simulated	MA	0	0	210507	6541542	393.771
Simulated	MA	0	0	210508	6541542	414.934
Simulated	MA	0	0	210509	6541542	421.264
Simulated	MA	0	0	210510	6541542	411.262
Simulated	MA	0	0	210511	6541542	403.025
Simulated	MA	0	0	210512	6541542	406.359
Simulated	MA	0	0	210513	6541542	442.284
Simulated	MA	0	0	210514	6541542	433
Simulated	MA	0	0	210515	6541542	413.743
Simulated	MA	0	0	210516	6541542	417.532
Simulated	MA	0	0	210517	6541542	432.835
Simulated	MA	0	0	210518	6541542	426.05
Simulated	MA	0	0	210519	6541542	405.48
Simulated	MA	0	0	210520	6541542	426.272
Simulated	MA	0	0	210461	6541543	405.502
Simulated	MA	0	0	210462	6541543	398.213
Simulated	MA	0	0	210463	6541543	420.28
Simulated	MA	0	0	210464	6541543	382.122
Simulated	MA	0	0	210465	6541543	388.608
Simulated	MA	0	0	210466	6541543	415.824
Simulated	MA	0	0	210467	6541543	405.541
Simulated	MA	0	0	210468	6541543	396.019
Simulated	MA	0	0	210469	6541543	422.769
Simulated	MA	0	0	210470	6541543	413.269
Simulated	MA	0	0	210471	6541543	384.784
Simulated	MA	12	23	210472	6541543	849.51
Simulated	MA	13	23	210473	6541543	865.667
Simulated	MA	0	0	210474	6541543	423.983
Simulated	MA	0	0	210475	6541543	416.036
Simulated	MA	0	0	210476	6541543	412.449
Simulated	MA	0	0	210477	6541543	396.09
Simulated	MA	0	0	210478	6541543	386.879
Simulated	MA	0	0	210479	6541543	438.945
Simulated	MA	20	23	210480	6541543	860.084
Simulated	MA	21	23	210481	6541543	811.382
Simulated	MA	22	23	210482	6541543	852.032
Simulated	MA	23	23	210483	6541543	855.171
Simulated	MA	24	23	210484	6541543	862.353
Simulated	MA	0	0	210485	6541543	413.518
Simulated	MA	0	0	210486	6541543	439.62
Simulated	MA	0	0	210487	6541543	402.389
Simulated	MA	0	0	210488	6541543	403.635
Simulated	MA	0	0	210489	6541543	396.535
Simulated	MA	0	0	210490	6541543	406.847
Simulated	MA	0	0	210491	6541543	409.299
Simulated	MA	0	0	210492	6541543	418.365
Simulated	MA	0	0	210493	6541543	393.863
Simulated	MA	0	0	210494	6541543	378.165
Simulated	MA	0	0	210495	6541543	391.144
Simulated	MA	0	0	210496	6541543	437.595
Simulated	MA	0	0	210497	6541543	439.215
Simulated	MA	0	0	210498	6541543	380.683
Simulated	MA	0	0	210499	6541543	381.05
Simulated	MA	0	0	210500	6541543	436.519
Simulated	MA	0	0	210501	6541543	403.254
Simulated	MA	0	0	210502	6541543	405.405
Simulated	MA	0	0	210503	6541543	412.4
Simulated	MA	0	0	210504	6541543	421.175
Simulated	MA	0	0	210505	6541543	404.202
Simulated	MA	0	0	210506	6541543	437.312
Simulated	MA	0	0	210507	6541543	425.576
Simulated	MA	0	0	210508	6541543	427.696
Simulated	MA	0	0	210509	6541543	408.767
Simulated	MA	0	0	210510	6541543	430.688
Simulated	MA	0	0	210511	6541543	450.28
Simulated	MA	0	0	210512	6541543	422.42
Simulated	MA	0	0	210513	6541543	447.921
Simulated	MA	0	0	210514	6541543	407.817
Simulated	MA	55	23	210515	6541543	806.226
Simulated	MA	56	23	210516	6541543	831.931
Simulated	MA	57	23	210517	6541543	807.412
Simulated	MA	0	0	210518	6541543	415.263
Simulated	MA	0	0	210519	6541543	372.16
Simulated	MA	0	0	210520	6541543	402.483
Simulated	MA	0	0	210461	6541544	429.094
Simulated	MA	0	0	210462	6541544	396.816
Simulated	MA	0	0	210463	6541544	428.14
Simulated	MA	4	24	210464	6541544	850.158
Simulated	MA	5	24	210465	6541544	859.77
Simulated	MA	0	0	210466	6541544	424.098
Simulated	MA	0	0	210467	6541544	424.6
Simulated	MA	0	0	210468	6541544	418.856
Simulated	MA	0	0	210469	6541544	377.387
Simulated	MA	0	0	210470	6541544	436.486
Simulated	MA	0	0	210471	6541544	358.94
Simulated	MA	0	0	210472	6541544	413.112
Simulated	MA	0	0	210473	6541544	426.154
Simulated	MA	0	0	210474	6541544	422.385
Simulated	MA	0	0	210475	6541544	402.755
Simulated	MA	0	0	210476	6541544	409.307
Simulated	MA	0	0	210477	6541544	384.478
Simulated	MA	0	0	210478	6541544	426.759
Simulated	MA	0	0	210479	6541544	419.347
Simulated	MA	20	24	210480	6541544	845.303
Simulated	MA	21	24	210481	6541544	810.667
Simulated	MA	22	24	210482	6541544	788.621
Simulated	MA	23	24	210483	6541544	762.465
Simulated	MA	24	24	210484	6541544	794.188
Simulated	MA	0	0	210485	6541544	392.769
Simulated	MA	0	0	210486	6541544	387.675
Simulated	MA	0	0	210487	6541544	435.227
Simulated	MA	0	0	210488	6541544	410.299
Simulated	MA	0	0	210489	6541544	361.214
Simulated	MA	0	0	210490	6541544	420.262
Simulated	MA	0	0	210491	6541544	414.264
Simulated	MA	0	0	210492	6541544	425.591
Simulated	MA	0	0	210493	6541544	391.867
Simulated	MA	0	0	210494	6541544	408.93
Simulated	MA	0	0	210495	6541544	381.058
Simulated	MA	0	0	210496	6541544	403.202
Simulated	MA	0	0	210497	6541544	430.222
Simulated	MA	0	0	210498	6541544	405.672
Simulated	MA	0	0	210499	6541544	421.916
Simulated	MA	0	0	210500	6541544	437.935
Simulated	MA	0	0	210501	6541544	426.78
Simulated	MA	0	0	210502	6541544	413.347
Simulated	MA	0	0	210503	6541544	424.939
Simulated	MA	0	0	210504	6541544	431.12
Simulated	MA	0	0	210505	6541544	414.946
Simulated	MA	46	24	210506	6541544	812.793
Simulated	MA	47	24	210507	6541544	774.25
Simulated	MA	0	0	210508	6541544	374.151
Simulated	MA	0	0	210509	6541544	409.322
Simulated	MA	0	0	210510	6541544	424.517
Simulated	MA	0	0	210511	6541544	456.373
Simulated	MA	0	0	210512	6541544	396.673
Simulated	MA	0	0	210513	6541544	421.786
Simulated	MA	0	0	210514	6541544	433.401
Simulated	MA	55	24	210515	6541544	849.315
Simulated	MA	56	24	210516	6541544	853.424
Simulated	MA	57	24	210517	6541544	790.895
Simulated	MA	0	0	210518	6541544	383.838
Simulated	MA	0	0	210519	6541544	373.867
Simulated	MA	0	0	210520	6541544	387.301
Simulated	MA	0	0	210461	6541545	417.742
Simulated	MA	0	0	210462	6541545	410.325
Simulated	MA	0	0	210463	6541545	429.056
Simulated	MA	4	25	210464	6541545	812.833
Simulated	MA	5	25	210465	6541545	767.129
Simulated	MA	0	0	210466	6541545	406.664
Simulated	MA	0	0	210467	6541545	392.912
Simulated	MA	0	0	210468	6541545	405.187
Simulated	MA	0	0	210469	6541545	398.103
Simulated	MA	10	25	210470	6541545	783.05
Simulated	MA	11	25	210471	6541545	811.868
Simulated	MA	0	0	210472	6541545	412.573
Simulated	MA	0	0	210473	6541545	413.259
Simulated	MA	0	0	210474	6541545	420.277
Simulated	MA	15	25	210475	6541545	775.188
Simulated	MA	16	25	210476	6541545	811.287
Simulated	MA	0	0	210477	6541545	382.083
Simulated	MA	0	0	210478	6541545	431.115
Simulated	MA	0	0	210479	6541545	411.129
Simulated	MA	20	25	210480	6541545	835.644
Simulated	MA	21	25	210481	6541545	752.728
Simulated	MA	22	25	210482	6541545	779.504
Simulated	MA	23	25	210483	6541545	802.79
Simulated	MA	24	25	210484	6541545	787.156
Simulated	MA	0	0	210485	6541545	415.022
Simulated	MA	0	0	210486	6541545	401.805
Simulated	MA	0	0	210487	6541545	384.306
Simulated	MA	0	0	210488	6541545	427.453
Simulated	MA	0	0	210489	6541545	420.959
Simulated	MA	30	25	210490	6541545	837.029
Simulated	MA	31	25	210491	6541545	894.127
Simulated	MA	32	25	210492	6541545	814.01
Simulated	MA	0	0	210493	6541545	405.628
Simulated	MA	0	0	210494	6541545	405.134
Simulated	MA	0	0	210495	6541545	423.013
Simulated	MA	36	25	210496	6541545	811.329
Simulated	MA	37	25	210497	6541545	782.416
Simulated	MA	0	0	210498	6541545	413.626
Simulated	MA	0	0	210499	6541545	423.611
Simulated	MA	40	25	210500	6541545	773.952
Simulated	MA	41	25	210501	6541545	829.141
Simulated	MA	0	0	210502	6541545	414.2
Simulated	MA	0	0	210503	6541545	427.676
Simulated	MA	0	0	210504	6541545	384.546
Simulated	MA	0	0	210505	6541545	358.242
Simulated	MA	46	25	210506	6541545	786.534
Simulated	MA	47	25	210507	6541545	806.295
Simulated	MA	0	0	210508	6541545	419.298
Simulated	MA	0	0	210509	6541545	383.963
Simulated	MA	0	0	210510	6541545	416.713
Simulated	MA	0	0	210511	6541545	407.15
Simulated	MA	0	0	210512	6541545	385.826
Simulated	MA	0	0	210513	6541545	403.46
Simulated	MA	0	0	210514	6541545	424.168
Simulated	MA	55	25	210515	6541545	855.778
Simulated	MA	56	25	210516	6541545	845.685
Simulated	MA	57	25	210517	6541545	746.895
Simulated	MA	0	0	210518	6541545	386.692
Simulated	MA	0	0	210519	6541545	395.86
Simulated	MA	0	0	210520	6541545	400.332
Simulated	MA	0	0	210461	6541546	417.347
Simulated	MA	0	0	210462	6541546	408.919
Simulated	MA	0	0	210463	6541546	399.068
Simulated	MA	0	0	210464	6541546	421.642
Simulated	MA	0	0	210465	6541546	364.362
Simulated	MA	0	0	210466	6541546	397.835
Simulated	MA	0	0	210467	6541546	401.451
Simulated	MA	0	0	210468	6541546	407.9
Simulated	MA	0	0	210469	6541546	396.552
Simulated	MA	10	26	210470	6541546	782.693
Simulated	MA	11	26	210471	6541546	773.333
Simulated	MA	0	0	210472	6541546	421.843
Simulated	MA	0	0	210473	6541546	407.542
Simulated	MA	0	0	210474	6541546	390.373
Simulated	MA	15	26	210475	6541546	840.104
Simulated	MA	16	26	210476	6541546	792.942
Simulated	MA	0	0	210477	6541546	403.918
Simulated	MA	0	0	210478	6541546	400.549
Simulated	MA	0	0	210479	6541546	426.963
Simulated	MA	20	26	210480	6541546	875.686
Simulated	MA	21	26	210481	6541546	829.205
Simulated	MA	22	26	210482	6541546	855.97
Simulated	MA	23	26	210483	6541546	834.316
Simulated	MA	24	26	210484	6541546	804.147
Simulated	MA	0	0	210485	6541546	399.896
Simulated	MA	0	0	210486	6541546	426.068
Simulated	MA	27	26	210487	6541546	897.765
Simulated	MA	28	26	210488	6541546	802.003
Simulated	MA	0	0	210489	6541546	394.728
Simulated	MA	30	26	210490	6541546	732.223
Simulated	MA	31	26	210491	6541546	906.836
Simulated	MA	32	26	210492	6541546	776.499
Simulated	MA	0	0	210493	6541546	416.559
Simulated	MA	0	0	210494	6541546	399.159
Simulated	MA	0	0	210495	6541546	398.906
Simulated	MA	36	26	210496	6541546	894.516
Simulated	MA	37	26	210497	6541546	755.601
Simulated	MA	0	0	210498	6541546	397.853
Simulated	MA	0	0	210499	6541546	407.278
Simulated	MA	40	26	210500	6541546	867.014
Simulated	MA	41	26	210501	6541546	813.07
Simulated	MA	0	0	210502	6541546	411.092
Simulated	MA	0	0	210503	6541546	440.658
Simulated	MA	0	0	210504	6541546	417.241
Simulated	MA	0	0	210505	6541546	418.518
Simulated	MA	0	0	210506	6541546	388.394
Simulated	MA	0	0	210507	6541546	435.085
Simulated	MA	0	0	210508	6541546	355.984
Simulated	MA	0	0	210509	6541546	385.099
Simulated	MA	0	0	210510	6541546	404.678
Simulated	MA	0	0	210511	6541546	427.802
Simulated	MA	0	0	210512	6541546	378.702
Simulated	MA	0	0	210513	6541546	409.649
Simulated	MA	0	0	210514	6541546	423.425
Simulated	MA	0	0	210515	6541546	406.012
Simulated	MA	0	0	210516	6541546	382.031
Simulated	MA	0	0	210517	6541546	377.951
Simulated	MA	0	0	210518	6541546	373.897
Simulated	MA	0	0	210519	6541546	426.392
Simulated	MA	0	0	210520	6541546	418.339
Simulated	MA	0	0	210461	6541547	403.543
Simulated	MA	0	0	210462	6541547	406.944
Simulated	MA	0	0	210463	6541547	436.501
Simulated	MA	0	0	210464	6541547	398.862
Simulated	MA	0	0	210465	6541547	415.987
Simulated	MA	0	0	210466	6541547	395.516
Simulated	MA	0	0	210467	6541547	430.985
Simulated	MA	0	0	210468	6541547	409.174
Simulated	MA	0	0	210469	6541547	406.852
Simulated	MA	0	0	210470	6541547	389.211
Simulated	MA	0	0	210471	6541547	352.227
Simulated	MA	0	0	210472	6541547	362.061
Simulated	MA	0	0	210473	6541547	390.871
Simulated	MA	14	27	210474	6541547	802.941
Simulated	MA	15	27	210475	6541547	815.547
Simulated	MA	0	0	210476	6541547	416.218
Simulated	MA	0	0	210477	6541547	436.335
Simulated	MA	0	0	210478	6541547	375.666
Simulated	MA	0	0	210479	6541547	428.256
Simulated	MA	0	0	210480	6541547	390.966
Simulated	MA	0	0	210481	6541547	410.808
Simulated	MA	0	0	210482	6541547	403.408
Simulated	MA	0	0	210483	6541547	409.988
Simulated	MA	0	0	210484	6541547	429.051
Simulated	MA	0	0	210485	6541547	416.533
Simulated	MA	0	0	210486	6541547	389.586
Simulated	MA	27	27	210487	6541547	846.344
Simulated	MA	28	27	210488	6541547	892.552
Simulated	MA	0	0	210489	6541547	402.618
Simulated	MA	30	27	210490	6541547	805.866
Simulated	MA	31	27	210491	6541547	889.465
Simulated	MA	32	27	210492	6541547	912.777
Simulated	MA	0	0	210493	6541547	398.277
Simulated	MA	0	0	210494	6541547	414.237
Simulated	MA	0	0	210495	6541547	403.012
Simulated	MA	0	0	210496	6541547	410.28
Simulated	MA	0	0	210497	6541547	427.735
Simulated	MA	0	0	210498	6541547	435.244
Simulated	MA	0	0	210499	6541547	435.866
Simulated	MA	0	0	210500	6541547	427.139
Simulated	MA	0	0	210501	6541547	396.307
Simulated	MA	0	0	210502	6541547	397.297
Simulated	MA	0	0	210503	6541547	432.606
Simulated	MA	0	0	210504	6541547	445.951
Simulated	MA	0	0	210505	6541547	375.676
Simulated	MA	0	0	210506	6541547	418.095
Simulated	MA	47	27	210507	6541547	903.529
Simulated	MA	48	27	210508	6541547	811.23
Simulated	MA	0	0	210509	6541547	439.469
Simulated	MA	0	0	210510	6541547	432.19
Simulated	MA	0	0	210511	6541547	447.72
Simulated	MA	0	0	210512	6541547	414.018
Simulated	MA	0	0	210513	6541547	415.206
Simulated	MA	0	0	210514	6541547	412.026
Simulated	MA	55	27	210515	6541547	829.238
Simulated	MA	56	27	210516	6541547	788.332
Simulated	MA	0	0	210517	6541547	409.489
Simulated	MA	0	0	210518	6541547	403.303
Simulated	MA	0	0	210519	6541547	396.274
Simulated	MA	0	0	210520	6541547	408.241
Simulated	MA	0	0	210461	6541548	421.908
Simulated	MA	0	0	210462	6541548	387.94
Simulated	MA	0	0	210463	6541548	404.53
Simulated	MA	0	0	210464	6541548	394.29
Simulated	MA	0	0	210465	6541548	372.833
Simulated	MA	0	0	210466	6541548	403.492
Simulated	MA	0	0	210467	6541548	422.762
Simulated	MA	0	0	210468	6541548	392.749
Simulated	MA	0	0	210469	6541548	420.346
Simulated	MA	0	0	210470	6541548	421.964
Simulated	MA	0	0	210471	6541548	422.362
Simulated	MA	0	0	210472	6541548	422.487
Simulated	MA	0	0	210473	6541548	392.208
Simulated	MA	14	28	210474	6541548	799.569
Simulated	MA	15	28	210475	6541548	932.172
Simulated	MA	0	0	210476	6541548	405.049
Simulated	MA	0	0	210477	6541548	382.897
Simulated	MA	0	0	210478	6541548	364.971
Simulated	MA	0	0	210479	6541548	376.956
Simulated	MA	20	28	210480	6541548	820.003
Simulated	MA	21	28	210481	6541548	787.259
Simulated	MA	0	0	210482	6541548	395.482
Simulated	MA	0	0	210483	6541548	413.753
Simulated	MA	0	0	210484	6541548	394.724
Simulated	MA	0	0	210485	6541548	424.612
Simulated	MA	0	0	210486	6541548	383.862
Simulated	MA	0	0	210487	6541548	412.123
Simulated	MA	0	0	210488	6541548	454.493
Simulated	MA	0	0	210489	6541548	436.243
Simulated	MA	0	0	210490	6541548	439.662
Simulated	MA	0	0	210491	6541548	438.415
Simulated	MA	0	0	210492	6541548	415.951
Simulated	MA	0	0	210493	6541548	398.156
Simulated	MA	0	0	210494	6541548	397.022
Simulated	MA	0	0	210495	6541548	436.789
Simulated	MA	0	0	210496	6541548	403.463
Simulated	MA	0	0	210497	6541548	408.923
Simulated	MA	0	0	210498	6541548	421.232
Simulated	MA	0	0	210499	6541548	394.95
Simulated	MA	0	0	210500	6541548	411.918
Simulated	MA	0	0	210501	6541548	406.026
Simulated	MA	0	0	210502	6541548	388.299
Simulated	MA	0	0	210503	6541548	431.196
Simulated	MA	0	0	210504	6541548	424.092
Simulated	MA	0	0	210505	6541548	442.401
Simulated	MA	0	0	210506	6541548	400.82
Simulated	MA	47	28	210507	6541548	849.629
Simulated	MA	48	28	210508	6541548	823.909
Simulated	MA	0	0	210509	6541548	435.374
Simulated	MA	0	0	210510	6541548	390.256
Simulated	MA	0	0	210511	6541548	407.286
Simulated	MA	0	0	210512	6541548	361.047
Simulated	MA	0	0	210513	6541548	382.723
Simulated	MA	0	0	210514	6541548	410.43
Simulated	MA	55	28	210515	6541548	797.076
Simulated	MA	56	28	210516	6541548	807.281
Simulated	MA	0	0	210517	6541548	429.425
Simulated	MA	0	0	210518	6541548	450.277
Simulated	MA	0	0	210519	6541548	411.336
Simulated	MA	0	0	210520	6541548	399.727
Simulated	MA	0	0	210461	6541549	405.339
Simulated	MA	0	0	210462	6541549	413.933
Simulated	MA	3	29	210463	6541549	814.378
Simulated	MA	4	29	210464	6541549	756.514
Simulated	MA	0	0	210465	6541549	386.6
Simulated	MA	0	0	210466	6541549	397.015
Simulated	MA	0	0	210467	6541549	419.182
Simulated	MA	0	0	210468	6541549	419.51
Simulated	MA	0	0	210469	6541549	417.176
Simulated	MA	0	0	210470	6541549	422.933
Simulated	MA	0	0	210471	6541549	418.28
Simulated	MA	0	0	210472	6541549	385.709
Simulated	MA	0	0	210473	6541549	384.904
Simulated	MA	0	0	210474	6541549	434
Simulated	MA	0	0	210475	6541549	396.866
Simulated	MA	0	0	210476	6541549	384.08
Simulated	MA	0	0	210477	6541549	358.657
Simulated	MA	0	0	210478	6541549	383.632
Simulated	MA	0	0	210479	6541549	378.924
Simulated	MA	20	29	210480	6541549	850.079
Simulated	MA	21	29	210481	6541549	856.332
Simulated	MA	0	0	210482	6541549	420.433
Simulated	MA	0	0	210483	6541549	419.934
Simulated	MA	0	0	210484	6541549	411.106
Simulated	MA	0	0	210485	6541549	399.866
Simulated	MA	0	0	210486	6541549	400.132
Simulated	MA	0	0	210487	6541549	424.468
Simulated	MA	0	0	210488	6541549	423.913
Simulated	MA	0	0	210489	6541549	432.684
Simulated	MA	0	0	210490	6541549	403.387
Simulated	MA	0	0	210491	6541549	410.647
Simulated	MA	0	0	210492	6541549	417.625
Simulated	MA	0	0	210493	6541549	407.617
Simulated	MA	0	0	210494	6541549	436.752
Simulated	MA	0	0	210495	6541549	383.688
Simulated	MA	0	0	210496	6541549	405.464
Simulated	MA	0	0	210497	6541549	407.422
Simulated	MA	0	0	210498	6541549	429.678
Simulated	MA	39	29	210499	6541549	844.613
Simulated	MA	40	29	210500	6541549	791.02
Simulated	MA	41	29	210501	6541549	833.88
Simulated	MA	0	0	210502	6541549	393.24
Simulated	MA	0	0	210503	6541549	389.988
Simulated	MA	0	0	210504	6541549	416.088
Simulated	MA	0	0	210505	6541549	410.334
Simulated	MA	0	0	210506	6541549	388.134
Simulated	MA	0	0	210507	6541549	394.875
Simulated	MA	0	0	210508	6541549	413.358
Simulated	MA	0	0	210509	6541549	401.876
Simulated	MA	0	0	210510	6541549	402.988
Simulated	MA	0	0	210511	6541549	400.704
Simulated	MA	0	0	210512	6541549	398.962
Simulated	MA	0	0	210513	6541549	394.71
Simulated	MA	0	0	210514	6541549	395.662
Simulated	MA	0	0	210515	6541549	424.686
Simulated	MA	0	0	210516	6541549	433.048
Simulated	MA	0	0	210517	6541549	435.491
Simulated	MA	0	0	210518	6541549	434.487
Simulated	MA	0	0	210519	6541549	411.029
Simulated	MA	0	0	210520	6541549	444.776
Simulated	MA	0	0	210461	6541550	399.507
Simulated	MA	0	0	210462	6541550	405.55
Simulated	MA	3	30	210463	6541550	836.168
Simulated	MA	4	30	210464	6541550	792.789
Simulated	MA	0	0	210465	6541550	403.47
Simulated	MA	0	0	210466	6541550	419.691
Simulated	MA	0	0	210467	6541550	369.77
Simulated	MA	0	0	210468	6541550	446.397
Simulated	MA	0	0	210469	6541550	439.205
Simulated	MA	0	0	210470	6541550	435.645
Simulated	MA	0	0	210471	6541550	408.21
Simulated	MA	12	30	210472	6541550	785.797
Simulated	MA	13	30	210473	6541550	773.25
Simulated	MA	14	30	210474	6541550	781.136
Simulated	MA	0	0	210475	6541550	409.087
Simulated	MA	0	0	210476	6541550	430.586
Simulated	MA	0	0	210477	6541550	401.242
Simulated	MA	0	0	210478	6541550	399.928
Simulated	MA	0	0	210479	6541550	435.622
Simulated	MA	0	0	210480	6541550	426.67
Simulated	MA	0	0	210481	6541550	376.509
Simulated	MA	0	0	210482	6541550	420.844
Simulated	MA	0	0	210483	6541550	407.555
Simulated	MA	0	0	210484	6541550	386.202
Simulated	MA	25	30	210485	6541550	850.742
Simulated	MA	26	30	210486	6541550	820.442
Simulated	MA	0	0	210487	6541550	448.576
Simulated	MA	0	0	210488	6541550	415.398
Simulated	MA	0	0	210489	6541550	419.168
Simulated	MA	30	30	210490	6541550	848.862
Simulated	MA	31	30	210491	6541550	803.4
Simulated	MA	0	0	210492	6541550	428.673
Simulated	MA	0	0	210493	6541550	388.028
Simulated	MA	0	0	210494	6541550	383.816
Simulated	MA	0	0	210495	6541550	418.455
Simulated	MA	0	0	210496	6541550	393.13
Simulated	MA	0	0	210497	6541550	432.683
Simulated	MA	0	0	210498	6541550	418.803
Simulated	MA	39	30	210499	6541550	882.494
Simulated	MA	40	30	210500	6541550	905.233
Simulated	MA	41	30	210501	6541550	796.006
Simulated	MA	0	0	210502	6541550	428.375
Simulated	MA	0	0	210503	6541550	365.813
Simulated	MA	0	0	210504	6541550	390.826
Simulated	MA	45	30	210505	6541550	776.807
Simulated	MA	46	30	210506	6541550	720.72
Simulated	MA	0	0	210507	6541550	435.157
Simulated	MA	0	0	210508	6541550	457.819
Simulated	MA	0	0	210509	6541550	416.142
Simulated	MA	0	0	210510	6541550	380.963
Simulated	MA	0	0	210511	6541550	399.461
Simulated	MA	0	0	210512	6541550	416.114
Simulated	MA	53	30	210513	6541550	835.222
Simulated	MA	54	30	210514	6541550	767.867
Simulated	MA	0	0	210515	6541550	406.891
Simulated	MA	0	0	210516	6541550	436.099
Simulated	MA	0	0	210517	6541550	414.044
Simulated	MA	0	0	210518	6541550	402.018
Simulated	MA	0	0	210519	6541550	404.524
Simulated	MA	0	0	210520	6541550	449.504
Simulated	MA	0	0	210461	6541551	425.161
Simulated	MA	0	0	210462	6541551	425.351
Simulated	MA	0	0	210463	6541551	427.825
Simulated	MA	0	0	210464	6541551	424.655
Simulated	MA	0	0	210465	6541551	402.024
Simulated	MA	0	0	210466	6541551	412.909
Simulated	MA	0	0	210467	6541551	433.855
Simulated	MA	0	0	210468	6541551	442.67
Simulated	MA	0	0	210469	6541551	447.678
Simulated	MA	0	0	210470	6541551	416.761
Simulated	MA	0	0	210471	6541551	415.457
Simulated	MA	12	31	210472	6541551	750.692
Simulated	MA	13	31	210473	6541551	759.448
Simulated	MA	14	31	210474	6541551	838.363
Simulated	MA	0	0	210475	6541551	410.135
Simulated	MA	0	0	210476	6541551	381.307
Simulated	MA	0	0	210477	6541551	379.117
Simulated	MA	0	0	210478	6541551	410.458
Simulated	MA	0	0	210479	6541551	415.044
Simulated	MA	0	0	210480	6541551	434.245
Simulated	MA	0	0	210481	6541551	386.71
Simulated	MA	0	0	210482	6541551	413.46
Simulated	MA	0	0	210483	6541551	398.125
Simulated	MA	0	0	210484	6541551	407.066
Simulated	MA	25	31	210485	6541551	788.65
Simulated	MA	26	31	210486	6541551	837.835
Simulated	MA	0	0	210487	6541551	397.731
Simulated	MA	0	0	210488	6541551	429.733
Simulated	MA	0	0	210489	6541551	407.049
Simulated	MA	30	31	210490	6541551	863.285
Simulated	MA	31	31	210491	6541551	883.673
Simulated	MA	0	0	210492	6541551	390.069
Simulated	MA	0	0	210493	6541551	370.439
Simulated	MA	0	0	210494	6541551	414.532
Simulated	MA	0	0	210495	6541551	411.826
Simulated	MA	0	0	210496	6541551	418.18
Simulated	MA	0	0	210497	6541551	442.644
Simulated	MA	0	0	210498	6541551	430.929
Simulated	MA	39	31	210499	6541551	863.022
Simulated	MA	40	31	210500	6541551	868.705
Simulated	MA	41	31	210501	6541551	858.355
Simulated	MA	0	0	210502	6541551	405.214
Simulated	MA	0	0	210503	6541551	435.13
Simulated	MA	0	0	210504	6541551	431.402
Simulated	MA	45	31	210505	6541551	813.294
Simulated	MA	46	31	210506	6541551	781.534
Simulated	MA	0	0	210507	6541551	404.995
Simulated	MA	0	0	210508	6541551	421.416
Simulated	MA	0	0	210509	6541551	438.241
Simulated	MA	0	0	210510	6541551	404.387
Simulated	MA	0	0	210511	6541551	403.808
Simulated	MA	0	0	210512	6541551	438.921
Simulated	MA	53	31	210513	6541551	846.43
Simulated	MA	54	31	210514	6541551	824.979
Simulated	MA	0	0	210515	6541551	408.214
Simulated	MA	0	0	210516	6541551	436.961
Simulated	MA	0	0	210517	6541551	434.917
Simulated	MA	58	31	210518	6541551	911.426
Simulated	MA	59	31	210519	6541551	862.878
Simulated	MA	0	0	210520	6541551	464.012
Simulated	MA	0	0	210461	6541552	400.34
Simulated	MA	0	0	210462	6541552	429.743
Simulated	MA	0	0	210463	6541552	401.27
Simulated	MA	0	0	210464	6541552	463.298
Simulated	MA	0	0	210465	6541552	403.026
Simulated	MA	0	0	210466	6541552	410.578
Simulated	MA	0	0	210467	6541552	431.637
Simulated	MA	0	0	210468	6541552	424.829
Simulated	MA	0	0	210469	6541552	403.213
Simulated	MA	0	0	210470	6541552	401.862
Simulated	MA	0	0	210471	6541552	398.965
Simulated	MA	12	32	210472	6541552	731.928
Simulated	MA	13	32	210473	6541552	902.149
Simulated	MA	14	32	210474	6541552	780.817
Simulated	MA	0	0	210475	6541552	404.993
Simulated	MA	0	0	210476	6541552	387.932
Simulated	MA	0	0	210477	6541552	350.309
Simulated	MA	0	0	210478	6541552	388.642
Simulated	MA	0	0	210479	6541552	392.214
Simulated	MA	0	0	210480	6541552	426.839
Simulated	MA	0	0	210481	6541552	411.358
Simulated	MA	0	0	210482	6541552	416.415
Simulated	MA	0	0	210483	6541552	452.384
Simulated	MA	0	0	210484	6541552	416.32
Simulated	MA	0	0	210485	6541552	421.391
Simulated	MA	0	0	210486	6541552	447.311
Simulated	MA	0	0	210487	6541552	413.641
Simulated	MA	0	0	210488	6541552	406.954
Simulated	MA	0	0	210489	6541552	446.311
Simulated	MA	0	0	210490	6541552	406.549
Simulated	MA	0	0	210491	6541552	414.937
Simulated	MA	0	0	210492	6541552	425.84
Simulated	MA	33	32	210493	6541552	805.747
Simulated	MA	34	32	210494	6541552	819.088
Simulated	MA	0	0	210495	6541552	429.432
Simulated	MA	0	0	210496	6541552	396.179
Simulated	MA	0	0	210497	6541552	399.161
Simulated	MA	0	0	210498	6541552	430.421
Simulated	MA	0	0	210499	6541552	382.614
Simulated	MA	0	0	210500	6541552	382.855
Simulated	MA	0	0	210501	6541552	411.889
Simulated	MA	0	0	210502	6541552	446.11
Simulated	MA	0	0	210503	6541552	432.186
Simulated	MA	0	0	210504	6541552	432.743
Simulated	MA	0	0	210505	6541552	383.308
Simulated	MA	0	0	210506	6541552	412.388
Simulated	MA	0	0	210507	6541552	415.588
Simulated	MA	0	0	210508	6541552	436.842
Simulated	MA	0	0	210509	6541552	424.981
Simulated	MA	0	0	210510	6541552	419.148
Simulated	MA	0	0	210511	6541552	421.954
Simulated	MA	0	0	210512	6541552	422.893
Simulated	MA	0	0	210513	6541552	393.794
Simulated	MA	0	0	210514	6541552	445.455
Simulated	MA	0	0	210515	6541552	434.61
Simulated	MA	0	0	210516	6541552	438.653
Simulated	MA	0	0	210517	6541552	411.483
Simulated	MA	58	32	210518	6541552	885.824
Simulated	MA	59	32	210519	6541552	872.168
Simulated	MA	0	0	210520	6541552	396.936
Simulated	MA	0	0	210461	6541553	410.667
Simulated	MA	0	0	210462	6541553	390.073
Simulated	MA	0	0	210463	6541553	410.986
Simulated	MA	0	0	210464	6541553	432.28
Simulated	MA	5	33	210465	6541553	893.239
Simulated	MA	6	33	210466	6541553	858.191
Simulated	MA	7	33	210467	6541553	814.882
Simulated	MA	0	0	210468	6541553	413.774
Simulated	MA	0	0	210469	6541553	402.16
Simulated	MA	0	0	210470	6541553	386.992
Simulated	MA	0	0	210471	6541553	422.277
Simulated	MA	0	0	210472	6541553	392.17
Simulated	MA	0	0	210473	6541553	408.975
Simulated	MA	0	0	210474	6541553	398.713
Simulated	MA	0	0	210475	6541553	401.464
Simulated	MA	0	0	210476	6541553	386.405
Simulated	MA	0	0	210477	6541553	377.196
Simulated	MA	0	0	210478	6541553	400.308
Simulated	MA	0	0	210479	6541553	421.114
Simulated	MA	0	0	210480	6541553	443.599
Simulated	MA	0	0	210481	6541553	431.881
Simulated	MA	0	0	210482	6541553	425.884
Simulated	MA	0	0	210483	6541553	449.352
Simulated	MA	0	0	210484	6541553	420.436
Simulated	MA	0	0	210485	6541553	428.584
Simulated	MA	0	0	210486	6541553	417.711
Simulated	MA	0	0	210487	6541553	402.066
Simulated	MA	0	0	210488	6541553	435.6
Simulated	MA	0	0	210489	6541553	410.767
Simulated	MA	0	0	210490	6541553	406.282
Simulated	MA	31	33	210491	6541553	783.147
Simulated	MA	32	33	210492	6541553	865.395
Simulated	MA	33	33	210493	6541553	817.524
Simulated	MA	34	33	210494	6541553	843.014
Simulated	MA	0	0	210495	6541553	399.07
Simulated	MA	0	0	210496	6541553	405.413
Simulated	MA	0	0	210497	6541553	434.262
Simulated	MA	0	0	210498	6541553	409.845
Simulated	MA	0	0	210499	6541553	421.542
Simulated	MA	40	33	210500	6541553	849.41
Simulated	MA	41	33	210501	6541553	844.889
Simulated	MA	0	0	210502	6541553	396.3
Simulated	MA	0	0	210503	6541553	423.213
Simulated	MA	0	0	210504	6541553	397.822
Simulated	MA	0	0	210505	6541553	397.035
Simulated	MA	0	0	210506	6541553	383.365
Simulated	MA	0	0	210507	6541553	443.616
Simulated	MA	0	0	210508	6541553	450.634
Simulated	MA	0	0	210509	6541553	427.449
Simulated	MA	0	0	210510	6541553	405.949
Simulated	MA	51	33	210511	6541553	815.174
Simulated	MA	52	33	210512	6541553	792.852
Simulated	MA	53	33	210513	6541553	884.51
Simulated	MA	0	0	210514	6541553	441.823
Simulated	MA	0	0	210515	6541553	419.384
Simulated	MA	0	0	210516	6541553	392.486
Simulated	MA	0	0	210517	6541553	425.121
Simulated	MA	0	0	210518	6541553	417.889
Simulated	MA	0	0	210519	6541553	406.228
Simulated	MA	0	0	210520	6541553	409.547
Simulated	MA	1	34	210461	6541554	802.313
Simulated	MA	2	34	210462	6541554	807.769
Simulated	MA	0	0	210463	6541554	412.724
Simulated	MA	0	0	210464	6541554	397.387
Simulated	MA	5	34	210465	6541554	816.798
Simulated	MA	6	34	210466	6541554	811.06
Simulated	MA	7	34	210467	6541554	820.437
Simulated	MA	0	0	210468	6541554	413.561
Simulated	MA	0	0	210469	6541554	428.793
Simulated	MA	0	0	210470	6541554	374.563
Simulated	MA	0	0	210471	6541554	413.098
Simulated	MA	0	0	210472	6541554	404.561
Simulated	MA	0	0	210473	6541554	414.429
Simulated	MA	0	0	210474	6541554	433.736
Simulated	MA	0	0	210475	6541554	399.227
Simulated	MA	0	0	210476	6541554	395.094
Simulated	MA	0	0	210477	6541554	396.453
Simulated	MA	0	0	210478	6541554	399.461
Simulated	MA	0	0	210479	6541554	429.305
[truncated: 19,601 more rows]
